# Supplementary material for: New Eremophilane-Type Sesquiterpenes from the Marine Sediment-Derived Fungus Emericellopsis maritima BC17 and Their Cytotoxic and Antimicrobial Activities
Source: MDPI journal article supplement (doi:10.3390/md21120634), 2023-12-11
Supplement: s1 [file s1]

# **New eremophilane-type sesquiterpenes from the marine sediment-derived fungus *Emericellopsis maritima* BC17 and their cytotoxic and antimicrobial activities**

Jorge R. Virués-Segovia,<sup>1</sup> Carlos Millán,<sup>1</sup> Cristina Pinedo,<sup>1</sup> Victoria E. González-Rodríguez,<sup>2</sup> Sokratis Papaspyrou,<sup>3</sup> David Zorrilla,<sup>4</sup> Thomas A. Mackenzie,<sup>5</sup> María C. Ramos,<sup>5</sup> Mercedes de la Cruz,<sup>5</sup> Josefina Aleu,<sup>1,\*</sup> Rosa Durán-Patrón<sup>1,\*</sup>

<sup>1</sup>Departamento de Química Orgánica, Facultad de Ciencias, Instituto de Biomoléculas, Campus Universitario Puerto Real s/n, Torre sur, 4ª planta, Universidad de Cádiz, 11510 Puerto Real, Cádiz, Spain.

<sup>2</sup>Departamento de Biomedicina, Biotecnología y Salud Pública, Laboratorio de Microbiología, Facultad de Ciencias del Mar y Ambientales, Universidad de Cádiz, 11510 Puerto Real, Cádiz, Spain.

<sup>3</sup>Departamento de Biología, Facultad de Ciencias del Mar y Ambientales, Universidad de Cádiz, 11510 Puerto Real, Cádiz, Spain.

<sup>4</sup>Departamento de Química Física, Facultad de Ciencias, Universidad de Cádiz, Campus Universitario Puerto Real s/n, 11510, Puerto Real, Cádiz, Spain.

<sup>5</sup>Centro de Excelencia en Investigación de Medicamentos Innovadores en Andalucía, Fundación MEDINA, Granada, Spain.

\*rosa.duran@uca.es, josefina.aleu@uca.es

## Table of contents

|                                                                                                                                            |    |
|--------------------------------------------------------------------------------------------------------------------------------------------|----|
| <b>Table S1.</b> $^1\text{H}$ NMR spectroscopic data for compounds <b>5-11</b> in $\text{CDCl}_3$ .                                        | 4  |
| <b>Table S2.</b> $^1\text{H}$ NMR spectroscopic data for compounds <b>12-17</b> in $\text{CDCl}_3$ .                                       | 5  |
| <b>Table S3.</b> $^{13}\text{C}$ NMR spectroscopic data for compounds <b>5-11</b> in $\text{CDCl}_3$ .                                     | 6  |
| <b>Table S4.</b> $^{13}\text{C}$ NMR spectroscopic data for compounds <b>12-17</b> in $\text{CDCl}_3$ .                                    | 7  |
| <b>Table S5.</b> $^1\text{H}$ and $^{13}\text{C}$ NMR (500 and 125 MHz) spectroscopic data for compounds <b>18-19</b> in $\text{CDCl}_3$ . | 8  |
| <b>Table S6.</b> Optical activities for compounds <b>5-8</b> and <b>10-19</b> .                                                            | 9  |
| <b>Figure S1.</b> $^1\text{H}$ NMR spectrum (500 MHz, $\text{CDCl}_3$ ) of compound <b>1</b> .                                             | 10 |
| <b>Figure S2.</b> $^{13}\text{C}$ NMR spectrum (125 MHz, $\text{CDCl}_3$ ) of compound <b>1</b> .                                          | 11 |
| <b>Figure S3.</b> gCOSY spectrum of compound <b>1</b> .                                                                                    | 12 |
| <b>Figure S4.</b> gHSQC spectrum of compound <b>1</b> .                                                                                    | 13 |
| <b>Figure S5.</b> gHMBC spectrum of compound <b>1</b> .                                                                                    | 14 |
| <b>Figure S6a-g.</b> 1D NOESY spectrum of compound <b>1</b> .                                                                              | 15 |
| <b>Figure S7.</b> HRESIMS spectrum of compound <b>1</b> .                                                                                  | 22 |
| <b>Figure S8.</b> $^1\text{H}$ NMR spectrum (500 MHz, $\text{CDCl}_3$ ) of compound <b>2</b> .                                             | 23 |
| <b>Figure S9.</b> $^{13}\text{C}$ NMR spectrum (125 MHz, $\text{CDCl}_3$ ) of compound <b>2</b> .                                          | 24 |
| <b>Figure S10.</b> gCOSY spectrum of compound <b>2</b> .                                                                                   | 25 |
| <b>Figure S11.</b> gHSQC spectrum of compound <b>2</b> .                                                                                   | 26 |
| <b>Figure S12.</b> gHMBC spectrum of compound <b>2</b> .                                                                                   | 27 |
| <b>Figure S13.</b> 2D NOESY spectrum of compound <b>2</b> .                                                                                | 28 |
| <b>Figure S14a-f.</b> 1D NOESY spectrum of compound <b>2</b> .                                                                             | 29 |
| <b>Figure S15.</b> HRESIMS spectrum of compound <b>2</b> .                                                                                 | 35 |
| <b>Figure S16.</b> $^1\text{H}$ NMR (400 MHz, $\text{CDCl}_3$ ) spectrum of compound <b>3</b> .                                            | 36 |
| <b>Figure S17.</b> $^{13}\text{C}$ NMR (100 MHz, $\text{CDCl}_3$ ) spectrum of compound <b>3</b> .                                         | 37 |
| <b>Figure S18.</b> gCOSY spectrum of compound <b>3</b> .                                                                                   | 38 |
| <b>Figure S19.</b> gHSQC spectrum of compound <b>3</b> .                                                                                   | 39 |
| <b>Figure S20.</b> gHMBC spectrum of compound <b>3</b> .                                                                                   | 40 |
| <b>Figure S21.</b> 2D NOESY spectrum of compound <b>3</b> .                                                                                | 41 |
| <b>Figure S22a-f.</b> 1D NOESY spectrum of compound <b>3</b> .                                                                             | 42 |
| <b>Figure S23.</b> HRESIMS spectrum of compound <b>3</b> .                                                                                 | 48 |
| <b>Figure S24a.</b> $^1\text{H}$ NMR spectrum (700 MHz, $\text{CD}_3\text{OD}$ ) of compound <b>4</b> .                                    | 49 |
| <b>Figure S24b.</b> Expansion of $^1\text{H}$ NMR spectrum (700 MHz, $\text{CD}_3\text{OD}$ ) of compound <b>4</b> .                       | 50 |
| <b>Figure S25.</b> $^{13}\text{C}$ NMR spectrum (175 MHz, $\text{CD}_3\text{OD}$ ) of compound <b>4</b> .                                  | 51 |

|                                                                    |    |
|--------------------------------------------------------------------|----|
| <b>Figure S26.</b> gCOSY spectrum of compound <b>4</b> .....       | 52 |
| <b>Figure S27.</b> gHSQC spectrum of compound <b>4</b> .....       | 53 |
| <b>Figure S28.</b> gHMBC spectrum of compound <b>4</b> .....       | 54 |
| <b>Figure S29a-e.</b> 1D NOESY spectra of compound <b>4</b> .....  | 55 |
| <b>Figure S30a-d.</b> 1D TOCSY spectra of compound <b>4</b> . .... | 60 |
| <b>Figure S31.</b> HRESIMS spectrum of compound <b>4</b> . ....    | 64 |

**Table S1.** <sup>1</sup>H NMR spectroscopic data for compounds **5-11** in CDCl<sub>3</sub>.

|            | <b>5</b>                                                  | <b>6</b>                                                  | <b>7</b>                                                  | <b>8</b>                                                  | <b>9</b>                                                  | <b>10</b>                                                 | <b>11</b>                                                 |
|------------|-----------------------------------------------------------|-----------------------------------------------------------|-----------------------------------------------------------|-----------------------------------------------------------|-----------------------------------------------------------|-----------------------------------------------------------|-----------------------------------------------------------|
| Position   | $\delta_{\text{H}}$ , Mult ( <i>J</i> in Hz) <sup>a</sup> | $\delta_{\text{H}}$ , Mult ( <i>J</i> in Hz) <sup>a</sup> | $\delta_{\text{H}}$ , Mult ( <i>J</i> in Hz) <sup>b</sup> | $\delta_{\text{H}}$ , Mult ( <i>J</i> in Hz) <sup>a</sup> | $\delta_{\text{H}}$ , Mult ( <i>J</i> in Hz) <sup>a</sup> | $\delta_{\text{H}}$ , Mult ( <i>J</i> in Hz) <sup>a</sup> | $\delta_{\text{H}}$ , Mult ( <i>J</i> in Hz) <sup>a</sup> |
| 1 $\alpha$ | 2.79-2.68, m                                              | 2.12, ddd (14.4, 4.4, 2.6)                                | 2.16, ddd (14.4, 4.5, 2.4)                                | -                                                         |                                                           | 1.42, m <sup>h</sup>                                      | 2.37, m                                                   |
| 1 $\beta$  | 2.79-2.68, m                                              | 2.76, tdd (14.4, 5.1, 1.9)                                | 2.57, tdd (14.4, 5.1, 1.9)                                | 4.33, t (3.0)                                             | 6.99, dt (9.8, 0.7)                                       | 1.35, td (12.2, 11.7, 2.8) <sup>h</sup>                   | 2.59, ddd (15.2, 3.4, 2.1)                                |
| 2 $\alpha$ | 2.60-2.48, m                                              | 1.69, tdd (14.0, 4.4, 2.8)                                | 1.72-1.64, m                                              | 1.99, dq (13.9, 3.0)                                      |                                                           | 2.13, m <sup>i</sup>                                      | -                                                         |
| 2 $\beta$  | 2.60-2.48, m                                              | 2.00, ddt (14.0, 5.1, 2.6)                                | 2.06, ddt (14.2, 5.1, 2.4)                                | 1.67, tt (13.9, 3.5)                                      | 6.21, dd (9.8, 0.7)                                       | 2.05-1.97, m <sup>i</sup>                                 | 4.2, br s                                                 |
| 3 $\alpha$ | -                                                         | 3.93, q (2.8)                                             | 5.06, q (2.8)                                             | 1.83, qd (13.4, 3.3)                                      | -                                                         | 1.31-1.22, m <sup>j</sup>                                 | 1.69, ddd (7.9, 3.0, 1.7, 2H)                             |
| 3 $\beta$  | -                                                         | -                                                         | -                                                         | 1.39, dq (13.4, 3.5)                                      | -                                                         | 1.73, m <sup>j</sup>                                      |                                                           |
| 4 $\alpha$ | 2.57, q (6.6)                                             | 1.55, qd (7.3, 2.8)                                       | 1.72-1.64, m                                              | 1.48, dqd (13.4, 6.9, 3.3)                                | 2.61, q (6.8)                                             | 1.31-1.22, m                                              | 2.05-1.89, m                                              |
| 6 $\alpha$ | 2.45, br d (13.9)                                         | 2.08, br d (13.0)                                         | 2.09, br d (13.1)                                         | 2.12, br d (14.2)                                         | 2.38, br d (13.9)                                         | 1.77, dt (12.7, 2.3) <sup>k</sup>                         | 2.05-1.89, m                                              |
| 6 $\beta$  | 2.82, d (13.9)                                            | 2.87, d (13.0)                                            | 2.89, d (13.1)                                            | 2.90, d (14.2)                                            | 2.99, d (13.9)                                            | 1.16, td (12.7, 0.9) <sup>k</sup>                         | 2.05-1.89, m                                              |
| 7 $\beta$  | -                                                         | -                                                         | -                                                         | -                                                         | -                                                         | 2.21, m                                                   | 3.13, dd (13.8, 5.1)                                      |
| 8 $\alpha$ | -                                                         | -                                                         | -                                                         | -                                                         | -                                                         | 2.05-1.97, m <sup>l</sup>                                 | -                                                         |
| 8 $\beta$  | -                                                         | -                                                         | -                                                         | -                                                         | -                                                         | 1.87, dddd (16.9, 11.6, 3.4, 2.0) <sup>l</sup>            | -                                                         |
| 9          | 5.92, dd (1.8, 0.9)                                       | 5.77, d (1.9)                                             | 5.78, d (1.9)                                             | 5.84, s                                                   | 6.07, t (0.7)                                             | 5.31, dt (5.6, 2.0)                                       | 5.81, d (2.0)                                             |
| 12         | 2.11, d (1.9) <sup>c</sup>                                | 2.09, s <sup>d</sup>                                      | 2.10, s <sup>e</sup>                                      | 2.11, s <sup>f</sup>                                      | 2.18, d (2.2) <sup>g</sup>                                | 1.74, t (1.1)                                             | 1.73, dd (1.5, 0.8)                                       |
| 13         | 1.86, d (1.2) <sup>c</sup>                                | 1.83, d (1.0) <sup>d</sup>                                | 1.83, d (1.0) <sup>e</sup>                                | 1.85, s <sup>f</sup>                                      | 1.92, d (1.5) <sup>g</sup>                                | 4.71, m                                                   | a: 4.97, p (1.5)<br>b: 4.81, dq (1.8, 0.8)                |
| 14 $\beta$ | 0.95, s                                                   | 1.15, s                                                   | 1.12, s                                                   | 1.14, s                                                   | 0.98, s                                                   | 0.97, s                                                   | 1.16, s                                                   |
| 15 $\beta$ | 1.08, d (6.7)                                             | 1.12, d (7.3)                                             | 1.02, d (7.1)                                             | 0.98, d (6.9)                                             | 1.17, d (6.8)                                             | 0.84, d (6.6)                                             | 0.92, d (6.9)                                             |
| OCOMe      | -                                                         | -                                                         | 2.10, s                                                   | -                                                         | -                                                         | -                                                         | -                                                         |

<sup>a</sup> 500 MHz; <sup>b</sup> 700 MHz; <sup>c-l</sup> Interchangeable assignments.

**Table S2.** <sup>1</sup>H NMR spectroscopic data for compounds **12-17** in CDCl<sub>3</sub>.

|             | <b>12</b>                                                 | <b>13</b>                                                 | <b>14</b>                                                 | <b>15</b>                                                 | <b>16</b>                                                 | <b>17</b>                                                 |
|-------------|-----------------------------------------------------------|-----------------------------------------------------------|-----------------------------------------------------------|-----------------------------------------------------------|-----------------------------------------------------------|-----------------------------------------------------------|
| Position    | $\delta_{\text{H}}$ , Mult ( <i>J</i> in Hz) <sup>b</sup> | $\delta_{\text{H}}$ , Mult ( <i>J</i> in Hz) <sup>a</sup> | $\delta_{\text{H}}$ , Mult ( <i>J</i> in Hz) <sup>c</sup> | $\delta_{\text{H}}$ , Mult ( <i>J</i> in Hz) <sup>b</sup> | $\delta_{\text{H}}$ , Mult ( <i>J</i> in Hz) <sup>b</sup> | $\delta_{\text{H}}$ , Mult ( <i>J</i> in Hz) <sup>b</sup> |
| 1 $\alpha$  | 4.56, dd (10.1, 2.0)                                      | 6.31-6.23, m                                              | 3.76, d (3.6)                                             | 3.63, d (3.5)                                             | 3.63, d (3.5)                                             | 3.15, dd (4.0, 1.2)                                       |
| 1 $\beta$   | -                                                         |                                                           | -                                                         | -                                                         | -                                                         | -                                                         |
| 2 $\alpha$  | -                                                         | 6.31-6.23, m                                              | 3.87, dd (5.1, 3.6)                                       | 3.89, dd (5.0, 3.5)                                       | 3.95, dd (5.1, 3.5)                                       | 3.45, dd (5.0, 4.0)                                       |
| 2 $\beta$   | 3.50, dd (10.1, 3.3)                                      |                                                           | -                                                         | -                                                         | -                                                         | -                                                         |
| 3 $\alpha$  | -                                                         | 4.18, q (4.6)                                             | 4.11, dt (9.9, 5.1)                                       | 5.13, t (5.0)                                             | 5.13, t (5.1)                                             | 5.23, dd (5.9, 5.0)                                       |
| 3 $\beta$   | 3.99, t (3.0)                                             | -                                                         | -                                                         | -                                                         | -                                                         | -                                                         |
| 4 $\alpha$  | 1.63-1.46, m                                              | 1.76, td (7.2, 4.6)                                       | 1.54, m                                                   | 1.77, m                                                   | 1.77, qd (7.1, 5.1)                                       | 1.64, p (7.1)                                             |
| 6 $\alpha$  | 2.00, dd (13.0, 4.6) <sup>d</sup>                         | 2.01, dd (12.9, 4.9) <sup>e</sup>                         | 2.09, dd (14.7, 1.0)                                      | 2.12, d (14.7)                                            | 2.14, d (14.2)                                            | 1.78, dd (13.2, 1.0)                                      |
| 6 $\beta$   | 1.86, q (13.7, 12.3) <sup>d</sup>                         | 1.85, dd (13.9, 12.9) <sup>e</sup>                        | 1.92, d (14.7)                                            | 1.92, d (14.7)                                            | 1.82, d (14.2)                                            | 1.38, d (13.2)                                            |
| 7 $\beta$   | 3.15, dd (14.4, 4.5)                                      | 3.24, dd (13.9, 4.9)                                      | -                                                         | -                                                         | -                                                         | -                                                         |
| 9 $\alpha$  | 6.22, d (2.0)                                             | 5.79, s                                                   | 6.39, s                                                   | 6.38, s                                                   | 6.41, s                                                   | 1.90, dd (12.6, 2.1)                                      |
| 9 $\beta$   |                                                           |                                                           |                                                           |                                                           |                                                           | 2.29, q (12.6)                                            |
| 10 $\alpha$ | -                                                         | -                                                         | -                                                         | -                                                         | -                                                         | 2.23, ddd (12.6, 2.1, 1.2)                                |
| 12          | 1.73, s                                                   | 1.72, dd (1.5, 0.8)                                       | 1.38, s                                                   | 1.39, s                                                   | 9.70, s                                                   | 3.82, m                                                   |
| 13          | a: 4.98, m<br>b: 4.82, s                                  | a: 4.98, p (1.5)<br>b: 4.86, dt (1.8, 0.8)                | 1.52, s                                                   | 1.52, s                                                   | 1.47, s                                                   | 1.44, s                                                   |
| 14 $\beta$  | 1.40, s                                                   | 1.32, s                                                   | 1.28, s                                                   | 1.30, s                                                   | 1.43, s                                                   | 1.15, s                                                   |
| 15 $\beta$  | 1.17, d (7.1)                                             | 1.15, d (7.2)                                             | 1.11, d (7.1)                                             | 1.00, d (7.1)                                             | 1.01, d (7.1)                                             | 0.90, d (7.1)                                             |
| OCOMe       | -                                                         | -                                                         | -                                                         | 2.14, s                                                   | 2.15, s                                                   | 2.11, s                                                   |

<sup>a</sup> 400 MHz; <sup>b</sup> 500 MHz; <sup>c</sup> 600 MHz; <sup>d-e</sup> Interchangeable assignments.

**Table S3.**  $^{13}\text{C}$  NMR spectroscopic data for compounds **5-11** in  $\text{CDCl}_3$ .

|          | <b>5</b>                                | <b>6</b>                                | <b>7</b>                                | <b>8</b>                                | <b>9</b>                                | <b>10</b>                               | <b>11</b>                               |
|----------|-----------------------------------------|-----------------------------------------|-----------------------------------------|-----------------------------------------|-----------------------------------------|-----------------------------------------|-----------------------------------------|
| Position | $\delta_{\text{C}}$ , Type <sup>a</sup> | $\delta_{\text{C}}$ , Type <sup>a</sup> | $\delta_{\text{C}}$ , Type <sup>b</sup> | $\delta_{\text{C}}$ , Type <sup>a</sup> |
| 1        | 31.1, CH <sub>2</sub>                   | 26.7, CH <sub>2</sub>                   | 27.1, CH <sub>2</sub>                   | 72.7, CH                                | 142.0, CH                               | 31.1, CH <sub>2</sub>                   | 40.0, CH <sub>2</sub>                   |
| 2        | 39.8, CH <sub>2</sub>                   | 33.7, CH <sub>2</sub>                   | 30.5, CH <sub>2</sub>                   | 32.8, CH <sub>2</sub>                   | 131.8, CH                               | 32.6, CH <sub>2</sub>                   | 66.8, CH                                |
| 3        | 210.2, C                                | 71.3, CH                                | 73.3, CH                                | 24.8, CH <sub>2</sub>                   | 200.0, C                                | 27.8, CH <sub>2</sub>                   | 37.1, CH <sub>2</sub>                   |
| 4        | 52.6, CH                                | 45.4, CH                                | 44.2, CH                                | 42.3, CH                                | 51.4, CH                                | 44.2, CH                                | 36.3, CH                                |
| 5        | 44.6, C                                 | 41.4, C                                 | 41.3, C                                 | 41.0, C                                 | 41.4, C                                 | 38.7, C                                 | 39.3, C                                 |
| 6        | 40.7, CH <sub>2</sub>                   | 41.9, CH <sub>2</sub>                   | 41.7, CH <sub>2</sub>                   | 42.3, CH <sub>2</sub>                   | 40.0, CH <sub>2</sub>                   | 43.3, CH <sub>2</sub>                   | 41.2, CH <sub>2</sub>                   |
| 7        | 126.7, C                                | 127.9, C                                | 127.6, C                                | 128.1, C                                | 126.3, C                                | 37.8, CH                                | 51.0, CH                                |
| 8        | 191.0, C                                | 192.2, C                                | 191.8, C                                | 192.4, C                                | 190.6, C                                | 31.3, CH <sub>2</sub>                   | 198.2, C                                |
| 9        | 127.7, CH                               | 126.1, CH                               | 126.6, CH                               | 129.1, CH                               | 131.6, CH                               | 118.8 CH                                | 127.0, CH                               |
| 10       | 162.8, C                                | 168.3, C                                | 166.7, C                                | 165.6, C                                | 156.6, C                                | 144.4, C                                | 166.2, C                                |
| 11       | 144.6, C                                | 143.1, C                                | 143.6, C                                | 144.3, C                                | 148.4, C                                | 150.6, C                                | 143.6, C                                |
| 12       | 22.3, <sup>c</sup> CH <sub>3</sub>      | 22.6, <sup>d</sup> CH <sub>3</sub>      | 22.7, <sup>e</sup> CH <sub>3</sub>      | 22.8, <sup>f</sup> CH <sub>3</sub>      | 23.4, <sup>g</sup> CH <sub>3</sub>      | 20.8, CH <sub>3</sub>                   | 20.0, CH <sub>3</sub>                   |
| 13       | 22.7, <sup>c</sup> CH <sub>3</sub>      | 22.1, <sup>d</sup> CH <sub>3</sub>      | 22.2, <sup>e</sup> CH <sub>3</sub>      | 22.4, <sup>f</sup> CH <sub>3</sub>      | 23.0, <sup>g</sup> CH <sub>3</sub>      | 108.3, CH <sub>2</sub>                  | 114.2, CH <sub>2</sub>                  |
| 14       | 18.5, CH <sub>3</sub>                   | 18.9, CH <sub>3</sub>                   | 18.4, CH <sub>3</sub>                   | 18.1, CH <sub>3</sub>                   | 18.1, CH <sub>3</sub>                   | 18.1, CH <sub>3</sub>                   | 15.4, CH <sub>3</sub>                   |
| 15       | 7.5, CH <sub>3</sub>                    | 12.1, CH <sub>3</sub>                   | 11.8, CH <sub>3</sub>                   | 15.5, CH <sub>3</sub>                   | 7.1, CH <sub>3</sub>                    | 15.7, CH <sub>3</sub>                   | 14.7, CH <sub>3</sub>                   |
| OCOMe    | -                                       | -                                       | 170.6, C                                | -                                       | -                                       | -                                       | -                                       |
| OCOMe    | -                                       | -                                       | 21.2, CH <sub>3</sub>                   | -                                       | -                                       | -                                       | -                                       |

<sup>a</sup> 125 MHz; <sup>b</sup> 175 MHz; <sup>c-g</sup> Interchangeable assignments.

**Table S4.**  $^{13}\text{C}$  NMR spectroscopic data for compounds **12-17** in  $\text{CDCl}_3$ .

|          | <b>12</b>                               | <b>13</b>                               | <b>14</b>                               | <b>15</b>                               | <b>16</b>                               | <b>17</b>                               |
|----------|-----------------------------------------|-----------------------------------------|-----------------------------------------|-----------------------------------------|-----------------------------------------|-----------------------------------------|
| Position | $\delta_{\text{C}}$ , Type <sup>b</sup> | $\delta_{\text{C}}$ , Type <sup>a</sup> | $\delta_{\text{C}}$ , Type <sup>c</sup> | $\delta_{\text{C}}$ , Type <sup>b</sup> | $\delta_{\text{C}}$ , Type <sup>b</sup> | $\delta_{\text{C}}$ , Type <sup>b</sup> |
| 1        | 69.5, CH                                | 129.3, CH                               | 58.0, CH                                | 55.9, CH                                | 55.9, CH                                | 57.5, CH                                |
| 2        | 76.2, CH                                | 136.1, CH                               | 58.0, CH                                | 55.1, CH                                | 55.5, CH                                | 50.2, CH                                |
| 3        | 73.9, CH                                | 68.2, CH                                | 67.7, CH                                | 69.9, CH                                | 69.8, CH                                | 71.3, CH                                |
| 4        | 44.4, CH                                | 42.0, CH                                | 44.0, CH                                | 42.0, CH                                | 42.8, CH                                | 44.0, CH                                |
| 5        | 39.5, C                                 | 36.2, C                                 | 37.1, C                                 | 37.2, C                                 | 38.1, C                                 | 38.4, C                                 |
| 6        | 42.9, CH <sub>2</sub>                   | 40.4, CH <sub>2</sub>                   | 42.1, CH <sub>2</sub>                   | 41.8, CH <sub>2</sub>                   | 41.6, CH <sub>2</sub>                   | 35.6, CH <sub>2</sub>                   |
| 7        | 50.1, CH                                | 51.4, CH                                | 62.3, C                                 | 62.4, C                                 | 67.3, C                                 | 68.3, C                                 |
| 8        | 198.5, C                                | 199.0, C                                | 194.0, C                                | 193.9, C                                | 191.6, C                                | 102.0, C                                |
| 9        | 121.5, CH                               | 125.5, CH                               | 131.9, CH                               | 131.4, CH                               | 129.9, CH                               | 34.4, CH <sub>2</sub>                   |
| 10       | 166.5, C                                | 161.6, C                                | 160.5, C                                | 160.7, C                                | 164.5, C                                | 41.7, CH                                |
| 11       | 143.3, C                                | 143.7, C                                | 64.6, C                                 | 64.6, C                                 | 67.4, C                                 | 61.1, C                                 |
| 12       | 20.1, CH <sub>3</sub>                   | 19.8, CH <sub>3</sub>                   | 21.5, CH <sub>3</sub>                   | 21.6, CH <sub>3</sub>                   | 198.6, C                                | 69.9, CH <sub>2</sub>                   |
| 13       | 114.4, CH <sub>2</sub>                  | 114.7, CH <sub>2</sub>                  | 19.4, CH <sub>3</sub>                   | 19.5, CH <sub>3</sub>                   | 13.7, CH <sub>3</sub>                   | 11.3, CH <sub>3</sub>                   |
| 14       | 19.5, CH <sub>3</sub>                   | 18.9, CH <sub>3</sub>                   | 23.4, CH <sub>3</sub>                   | 22.9, CH <sub>3</sub>                   | 21.9, CH <sub>3</sub>                   | 15.5, CH <sub>3</sub>                   |
| 15       | 11.3, CH <sub>3</sub>                   | 10.4, CH <sub>3</sub>                   | 10.6, CH <sub>3</sub>                   | 10.4, CH <sub>3</sub>                   | 10.1, CH <sub>3</sub>                   | 9.7, CH <sub>3</sub>                    |
| OCOMe    | -                                       | -                                       | -                                       | 170.7, C                                | 170.6, C                                | 171.0, C                                |
| OCOMe    | -                                       | -                                       | -                                       | 20.7, CH <sub>3</sub>                   | 20.7, CH <sub>3</sub>                   | 20.9, CH <sub>3</sub>                   |

<sup>a</sup> 100 MHz; <sup>b</sup> 125 MHz; <sup>c</sup> 150 MHz.

**Table S5.**  $^1\text{H}$  and  $^{13}\text{C}$  NMR (500 and 125 MHz) spectroscopic data for compounds **18-19** in  $\text{CDCl}_3$ .

| 18         |                                         |                                  | 19                                      |                            |
|------------|-----------------------------------------|----------------------------------|-----------------------------------------|----------------------------|
| Position   | $\delta_{\text{H}}$ , Mult ( $J$ in Hz) | $\delta_{\text{C}}$ , Type       | $\delta_{\text{H}}$ , Mult ( $J$ in Hz) | $\delta_{\text{C}}$ , Type |
| 1          | -                                       | 170.0, <sup>b</sup> C            | -                                       | 169.7, <sup>d</sup> C      |
| 3a         | 3.57, m, 2H                             | 45.5, $\text{CH}_2$              | 3.62, m                                 | 45.1, $\text{CH}_2$        |
| 3b         |                                         |                                  | 3.53, ddd (12.0, 9.1, 3.0)              |                            |
| 4a         | 2.18-1.97, m                            | 22.7, $\text{CH}_2$              | 2.09-1.99, m                            | 22.4, $\text{CH}_2$        |
| 4b         | 1.90, m                                 |                                  | 1.90, m                                 |                            |
| 5a         | 2.35, dtd (13.3, 6.9, 3.0)              | 28.1, $\text{CH}_2$              | 2.37, m                                 | 28.5, $\text{CH}_2$        |
| 5b         | 2.18-1.97, m                            |                                  | 2.09-1.99, m                            |                            |
| 6 $\alpha$ | 4.11, t (8.2)                           | 59.0, CH                         | 4.06, m                                 | 58.8, CH                   |
| 7          | -                                       | 166.1, <sup>b</sup> C            | -                                       | 164.9, <sup>d</sup> C      |
| 8          | 5.65, br s                              | -                                | 5.63, br s                              | -                          |
| 9 $\alpha$ | 4.01, dd (9.7, 3.9)                     | 53.4, CH                         | 3.96, br t (2.5)                        | 60.5, CH                   |
| 10a        | 2.18-1.97, m                            | 38.6, $\text{CH}_2$              | 2.31, m                                 | 35.2, CH                   |
| 10b        | 1.51, m                                 |                                  | -                                       |                            |
| 11a        | 1.72, m                                 | 24.8, CH                         | 1.42, dqd (13.3, 7.5, 3.8)              | 24.0, $\text{CH}_2$        |
| 11b        | -                                       |                                  | 1.16, m                                 |                            |
| 12         | 1.00, d (6.6) <sup>a</sup>              | 23.3, <sup>c</sup> $\text{CH}_3$ | 0.92, t (7.5)                           | 12.0, $\text{CH}_3$        |
| Me-10      | -                                       | -                                | 1.04, d (7.3)                           | 16.0, $\text{CH}_3$        |
| Me-11      | 0.95, d (6.6) <sup>a</sup>              | 21.2, <sup>c</sup> $\text{CH}_3$ | -                                       | -                          |

<sup>a-d</sup> Interchangeable assignments.



**Table S6.** Optical activities for compounds **5-8** and **10-19**.

| Compound  | $[\alpha]_D^T$                                                       |
|-----------|----------------------------------------------------------------------|
| <b>5</b>  | +31 (c 0.06, CHCl <sub>3</sub> , 26°C)                               |
| <b>6</b>  | +110 (c 0.11, CHCl <sub>3</sub> , 21°C)                              |
| <b>7</b>  | +34 (c 0.21, CHCl <sub>3</sub> , 26°C)                               |
| <b>8</b>  | +47 (c 0.05, CHCl <sub>3</sub> , 22°C)                               |
| <b>10</b> | +89 (c 0.04, Hexane, 24°C)<br>+15 (c 0.23, CHCl <sub>3</sub> , 24°C) |
| <b>11</b> | +90 (c 0.12, CHCl <sub>3</sub> , 24°C)                               |
| <b>12</b> | +25 (c 0.05, MeOH, 22°C)                                             |
| <b>13</b> | +377 (c 0.25, CHCl <sub>3</sub> , 22°C)                              |
| <b>14</b> | +71 (c 0.06, CHCl <sub>3</sub> , 23°C)                               |
| <b>15</b> | +137 (c 0.07, CHCl <sub>3</sub> , 23°C)                              |
| <b>16</b> | +239 (c 0.10, CHCl <sub>3</sub> , 24°C)                              |
| <b>17</b> | +78 (c 0.11, CHCl <sub>3</sub> , 25°C)                               |
| <b>18</b> | -89 (c 0.3, CHCl <sub>3</sub> , 27°C)                                |
| <b>19</b> | -92 (c 0.4, CHCl <sub>3</sub> , 27°C)<br>-66 (c 0.4, EtOH, 26°C)     |

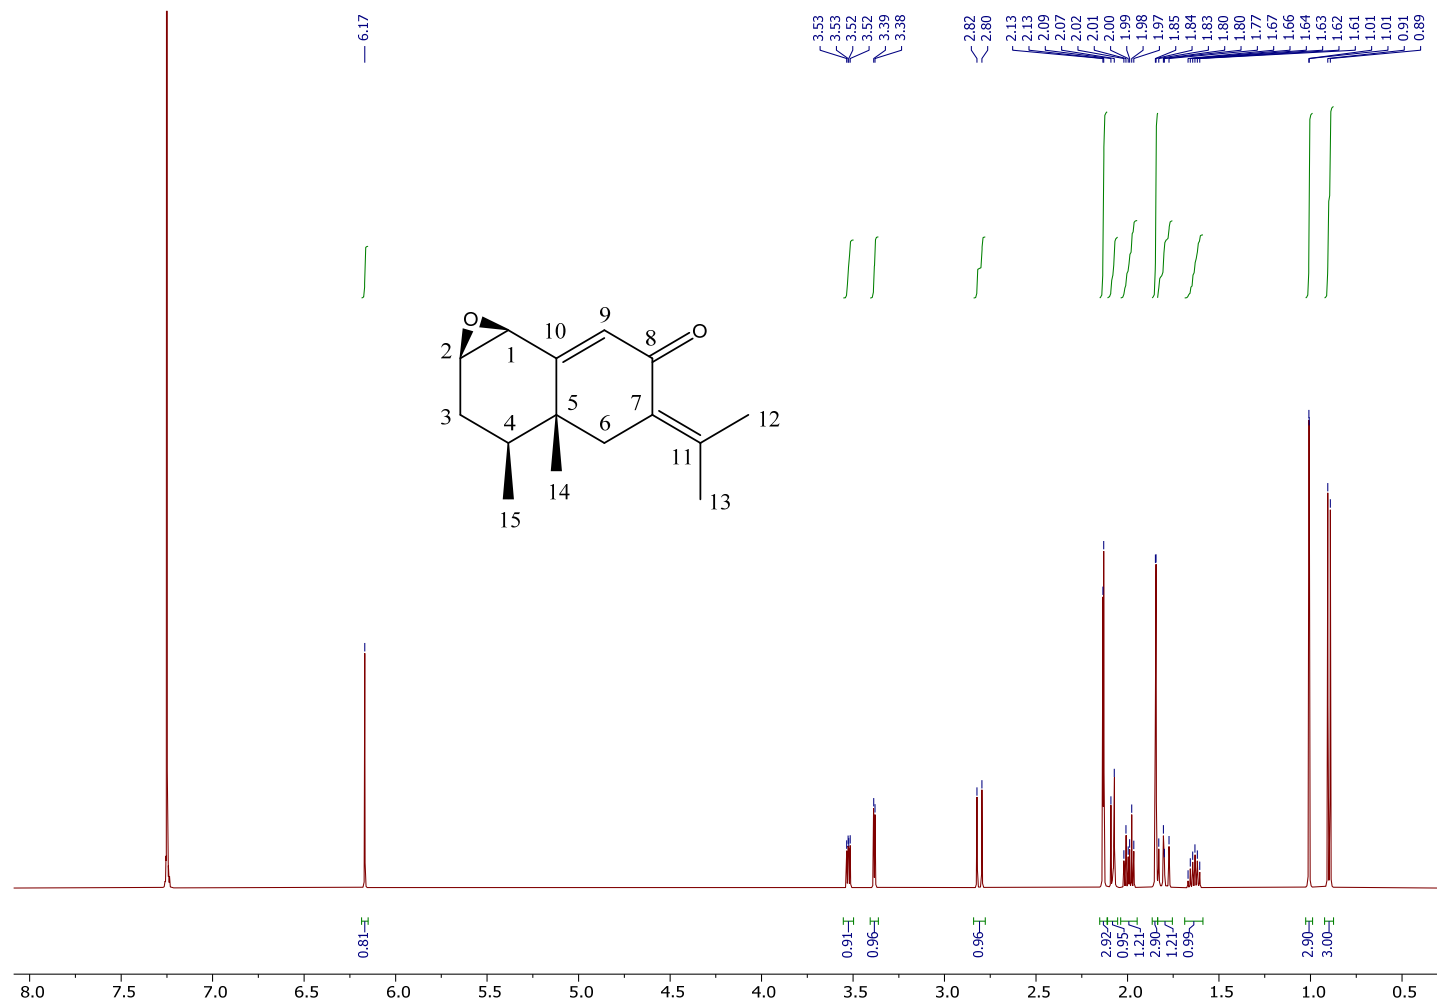

**Figure S1.**  $^1\text{H}$  NMR spectrum (500 MHz,  $\text{CDCl}_3$ ) of compound **1**.

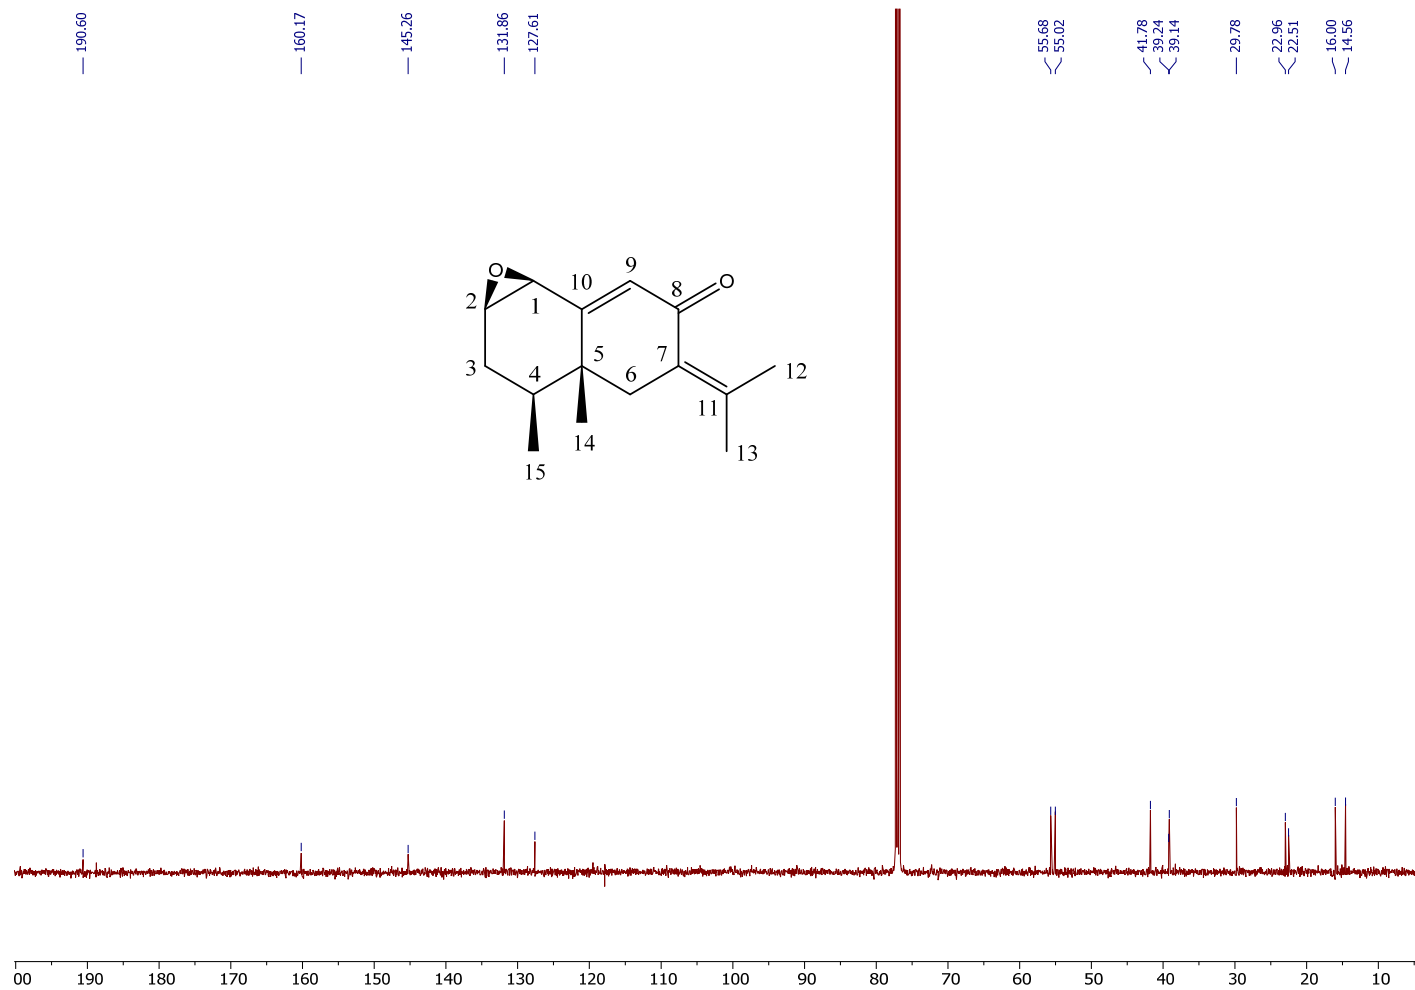

**Figure S2.** <sup>13</sup>C NMR spectrum (125 MHz, CDCl<sub>3</sub>) of compound 1.

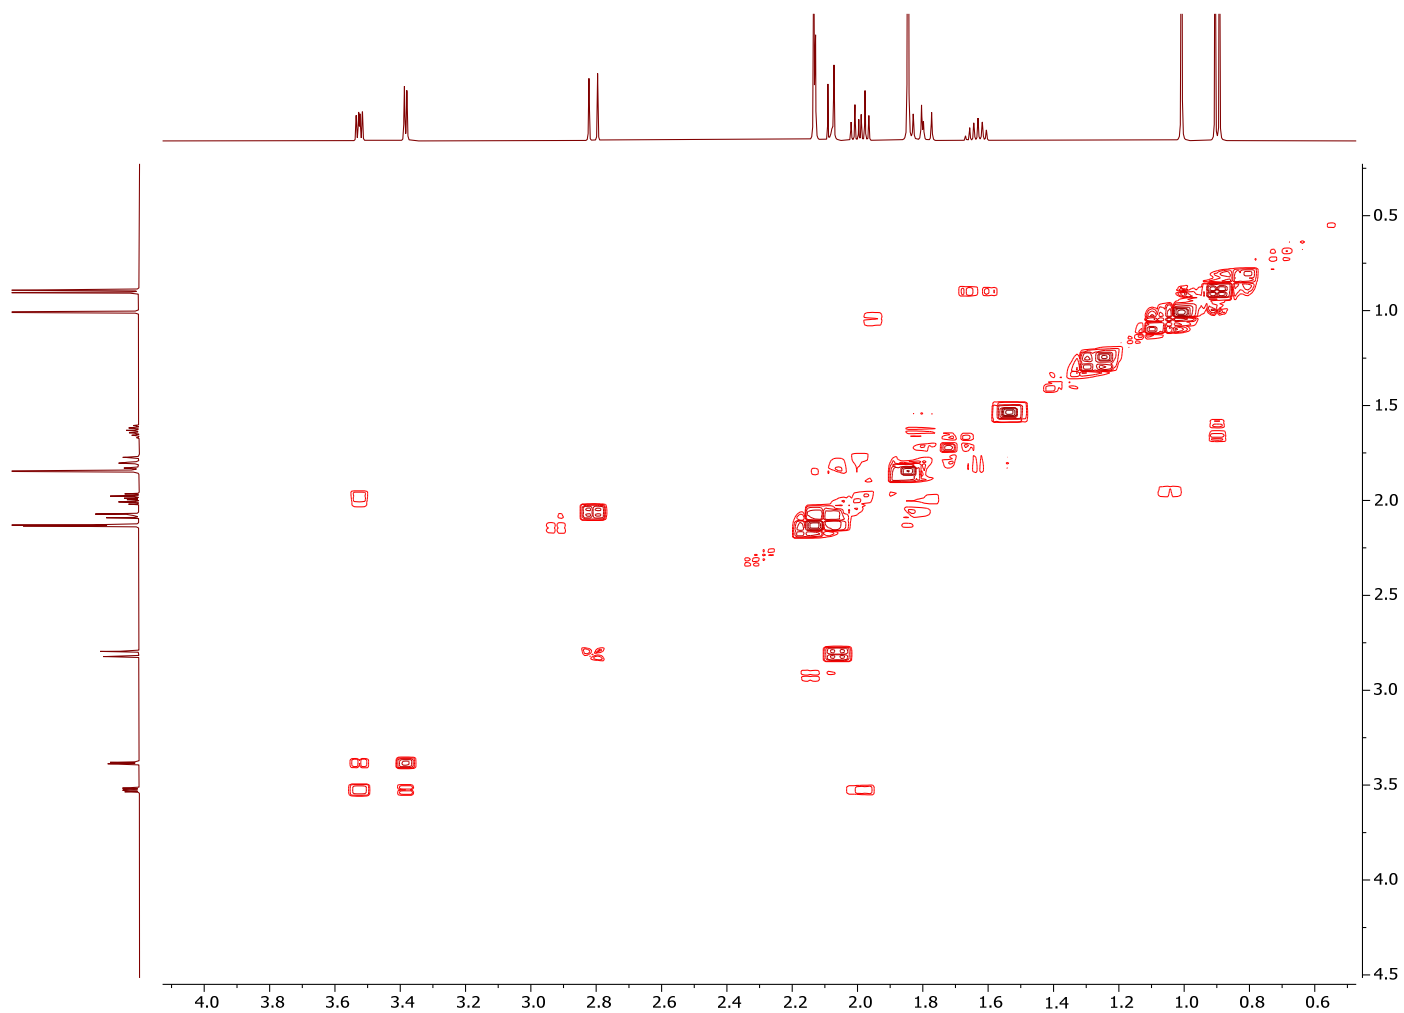

**Figure S3.** gCOSY spectrum of compound **1**.

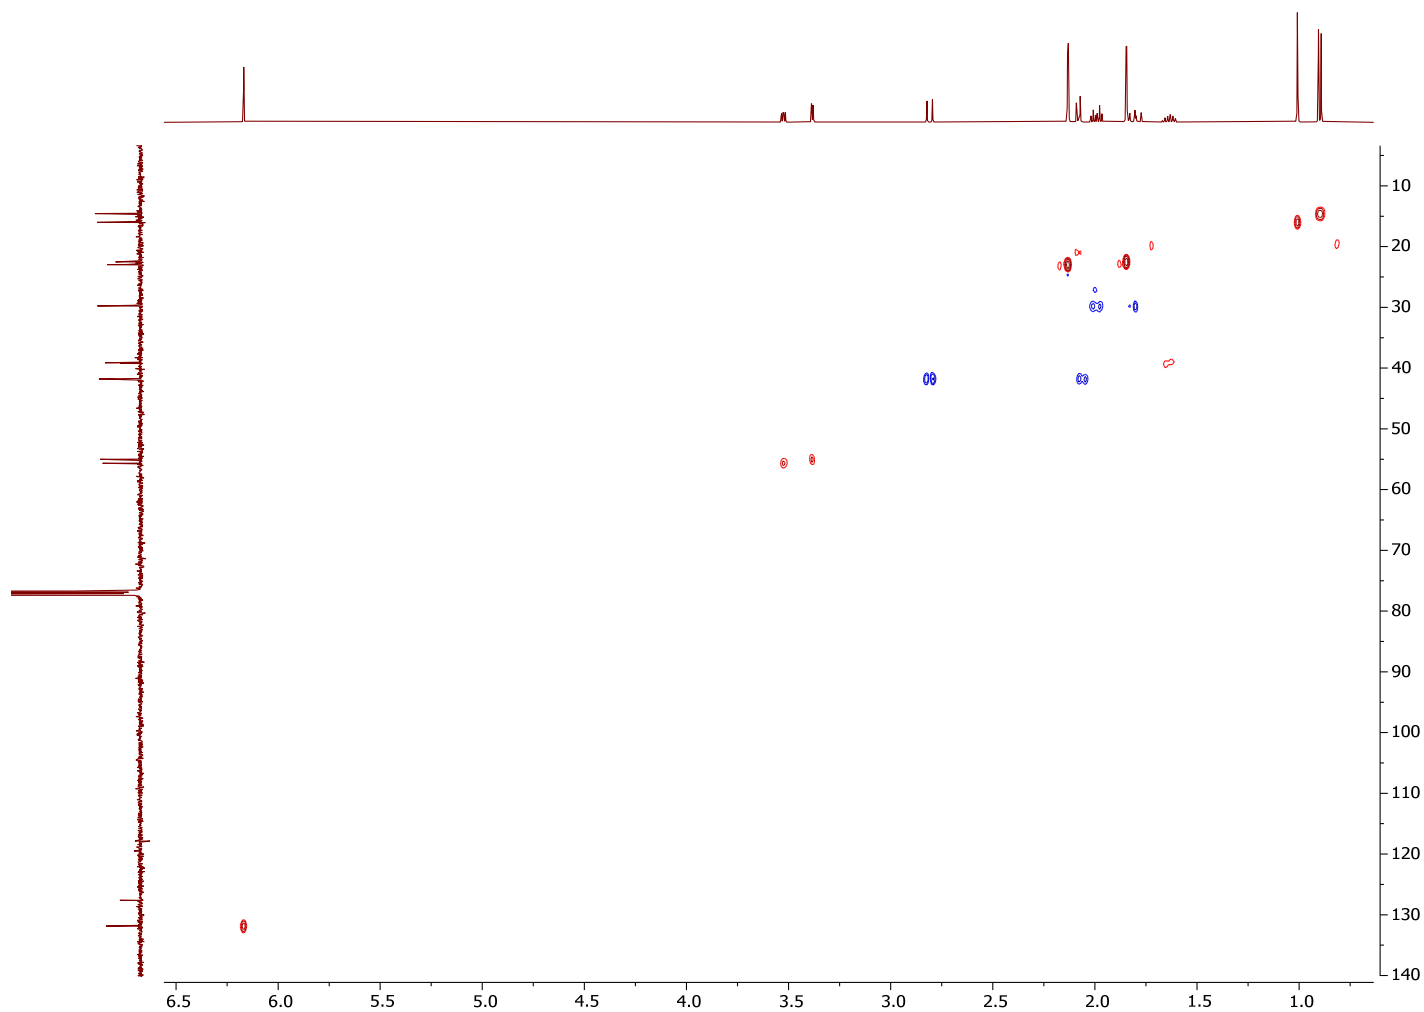

**Figure S4.** gHSQC spectrum of compound **1**.

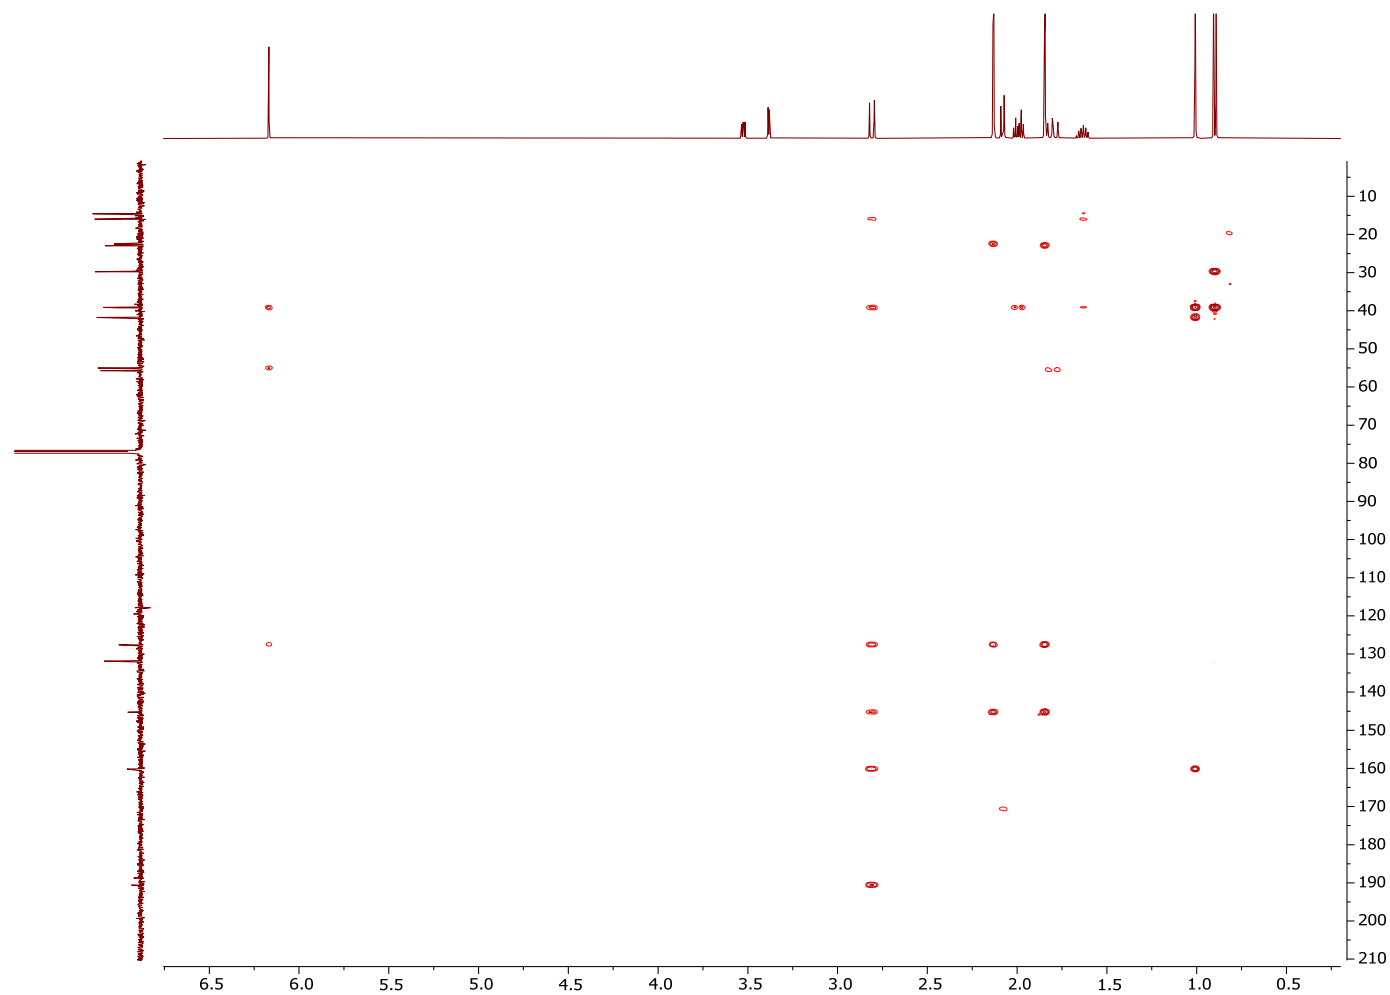

**Figure S5.** gHMBC spectrum of compound **1**.

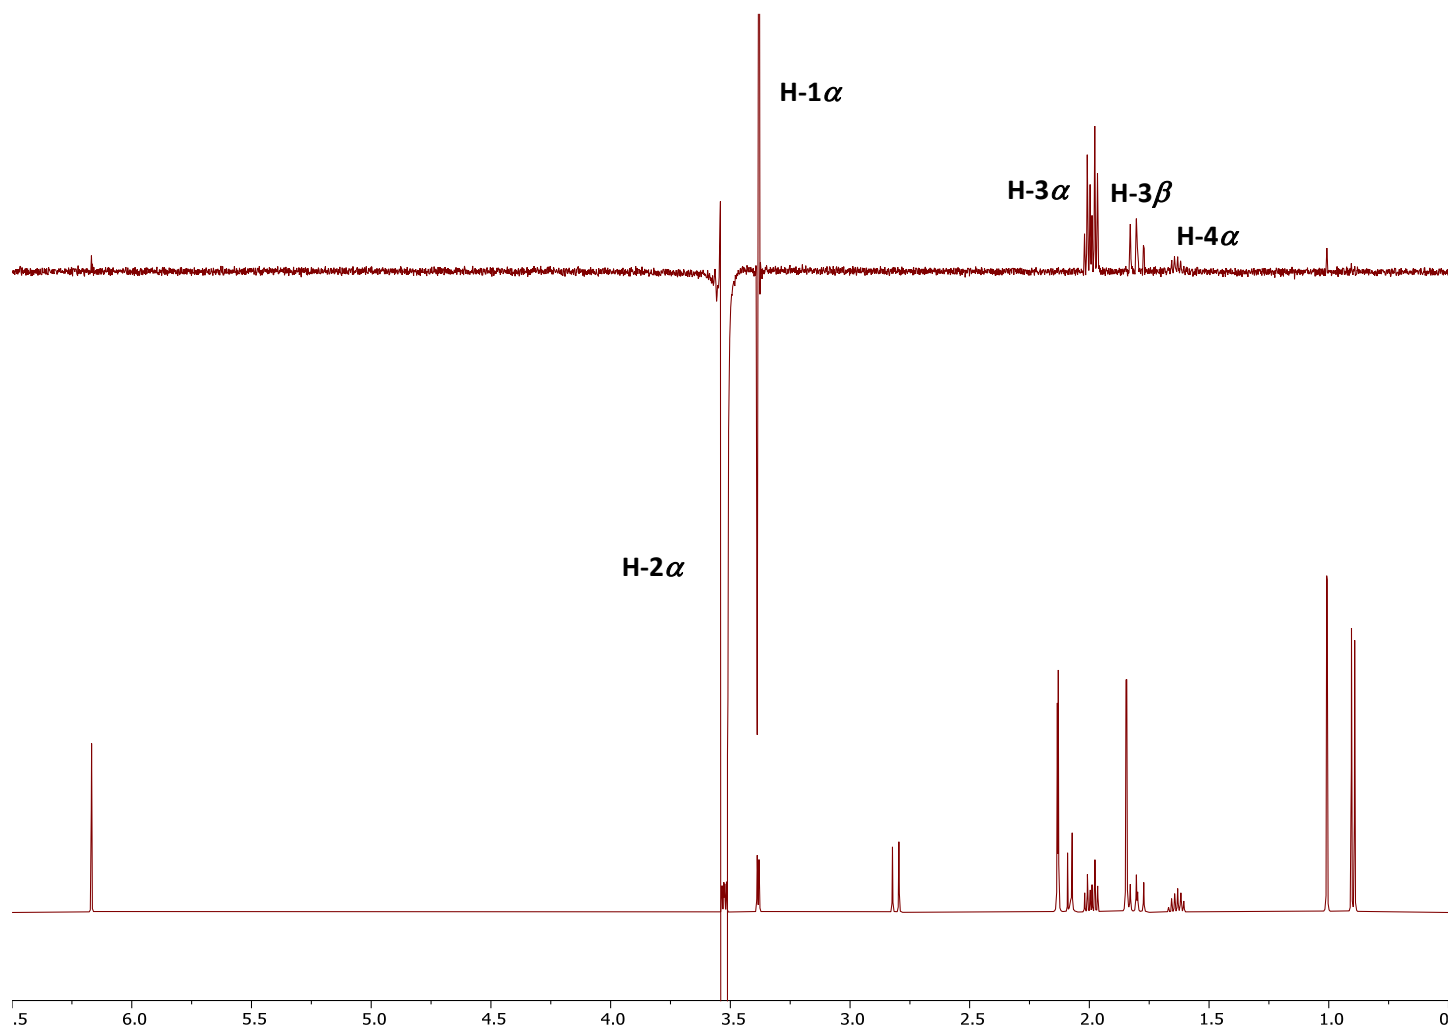

**Figure S6a.** 1D NOESY spectrum of compound **1**.

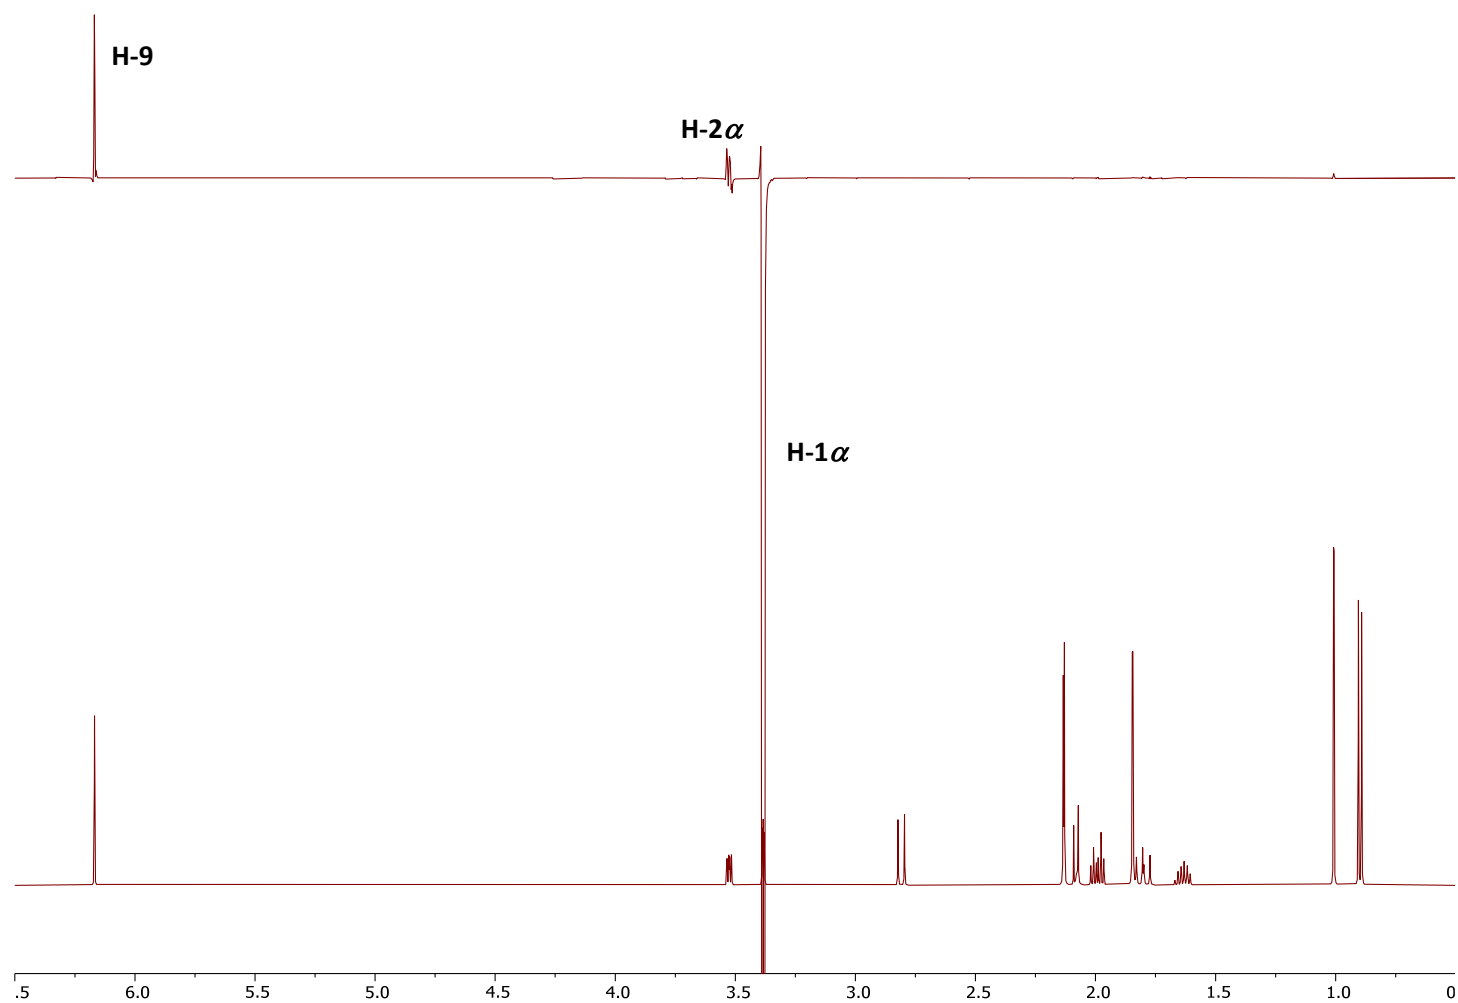

**Figure S6b.** 1D NOESY spectrum of compound **1**.



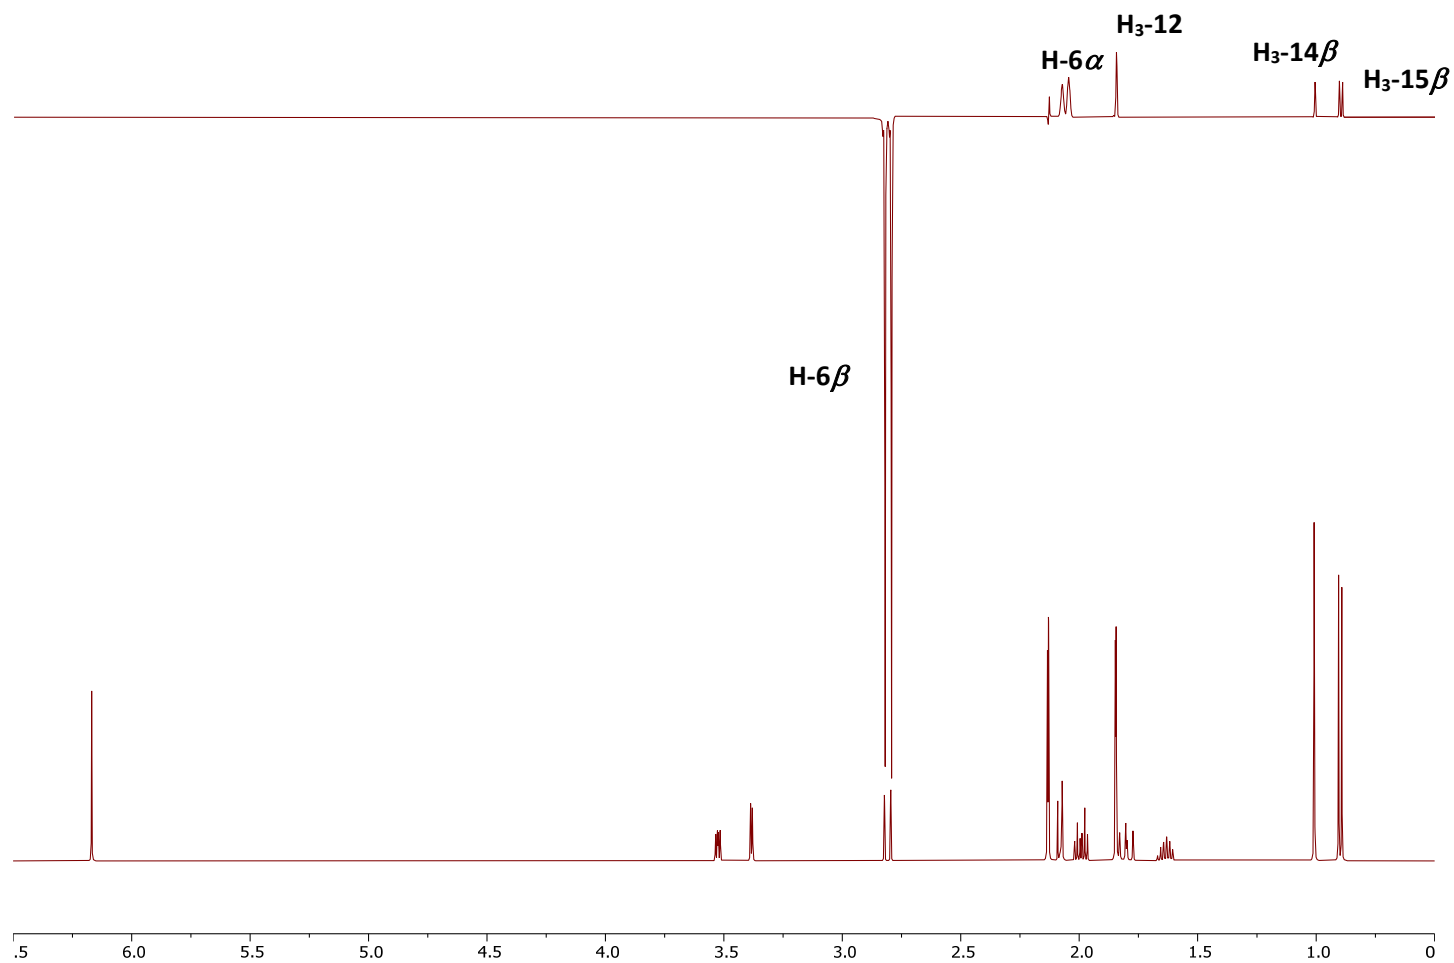

**Figure S6c.** 1D NOESY spectrum of compound **1**.

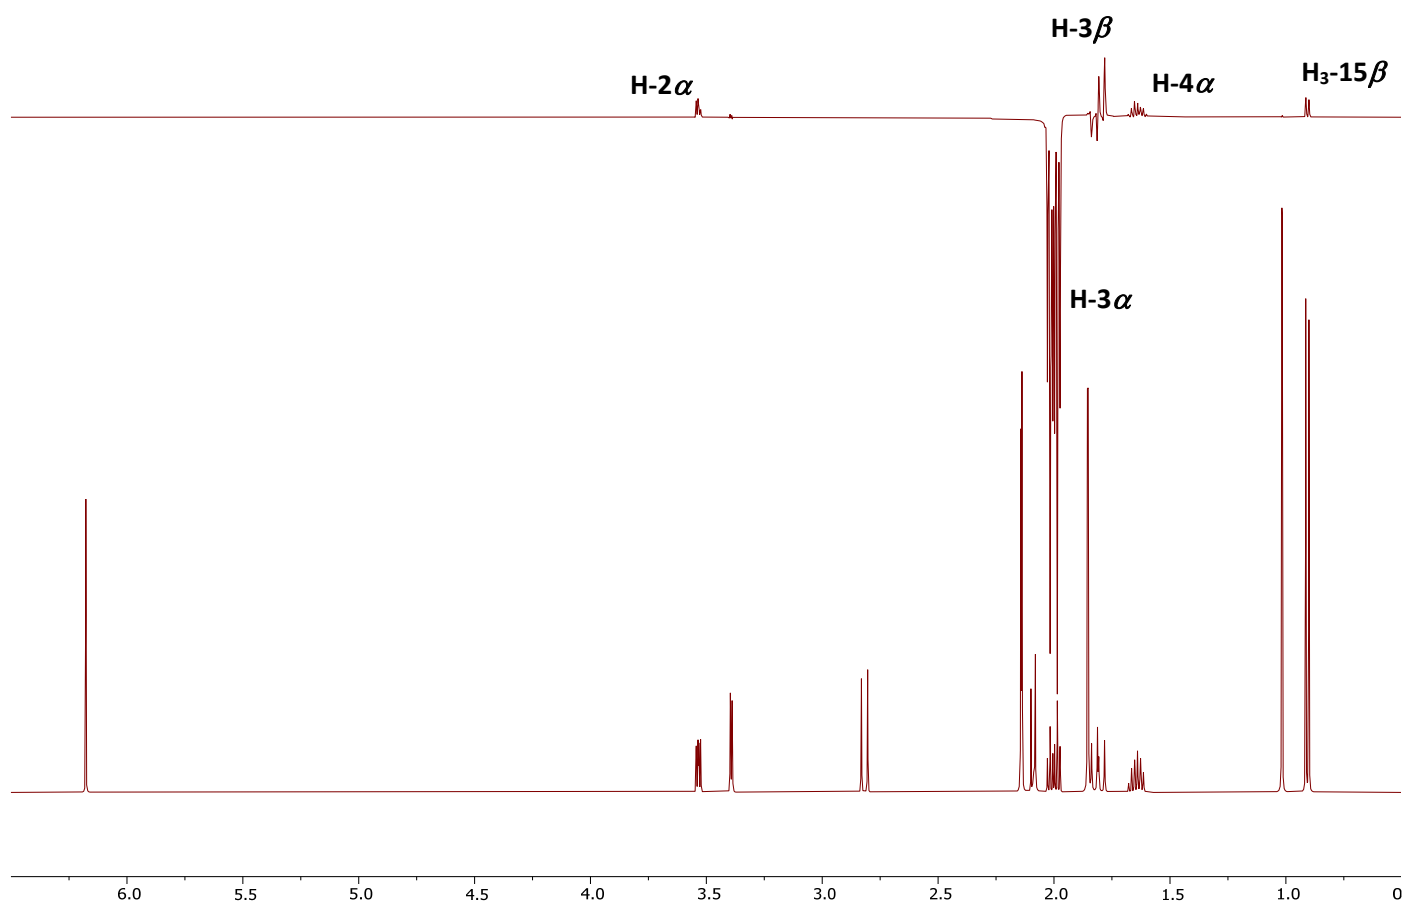

**Figure S6d.** 1D NOESY spectrum of compound **1**.

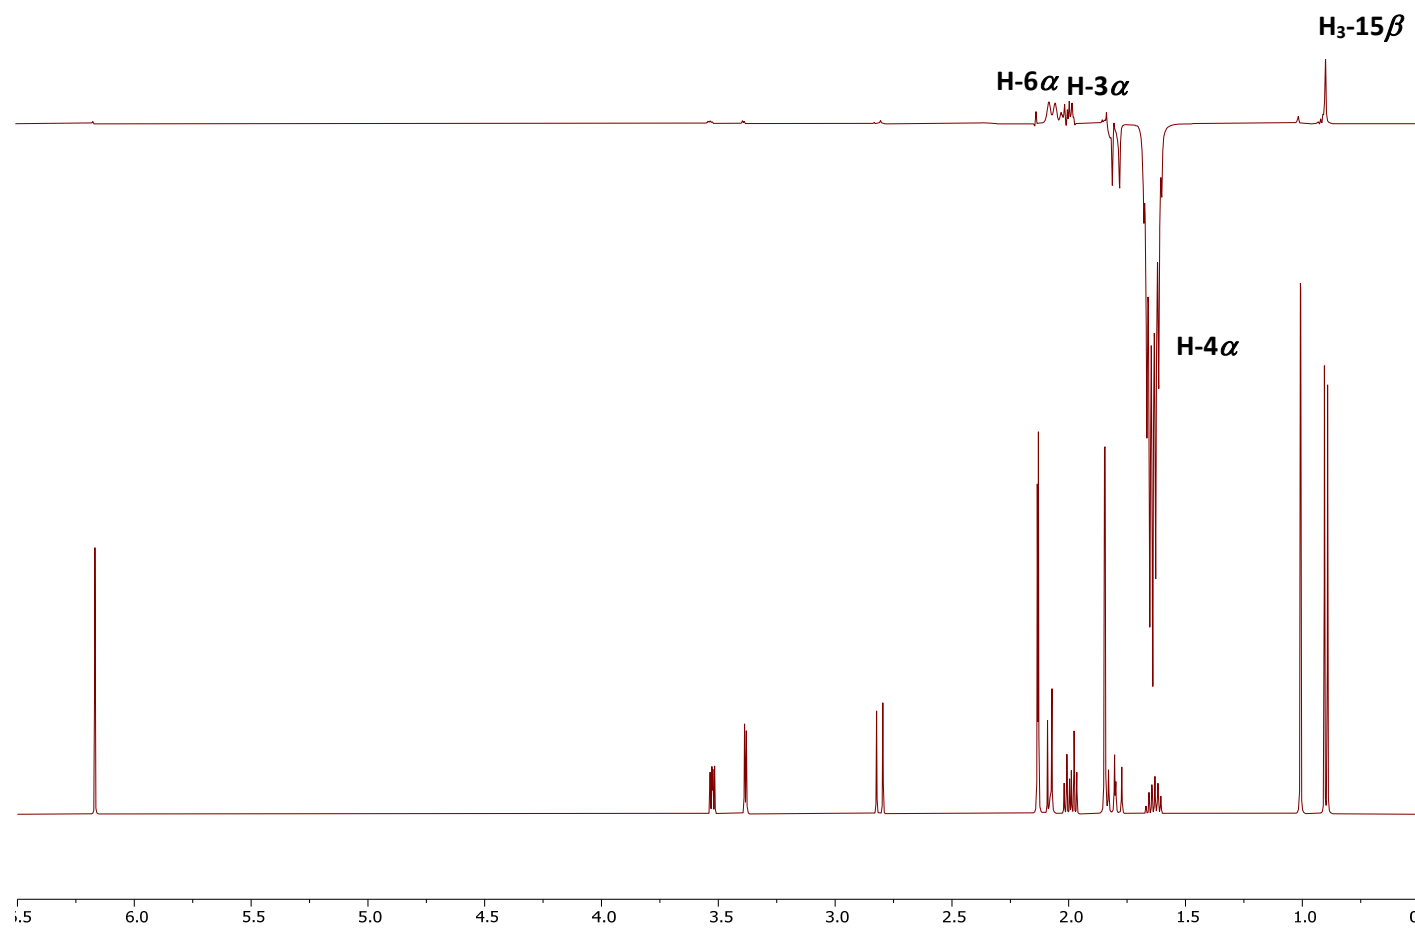

**Figure S6e.** 1D NOESY spectrum of compound **1**.

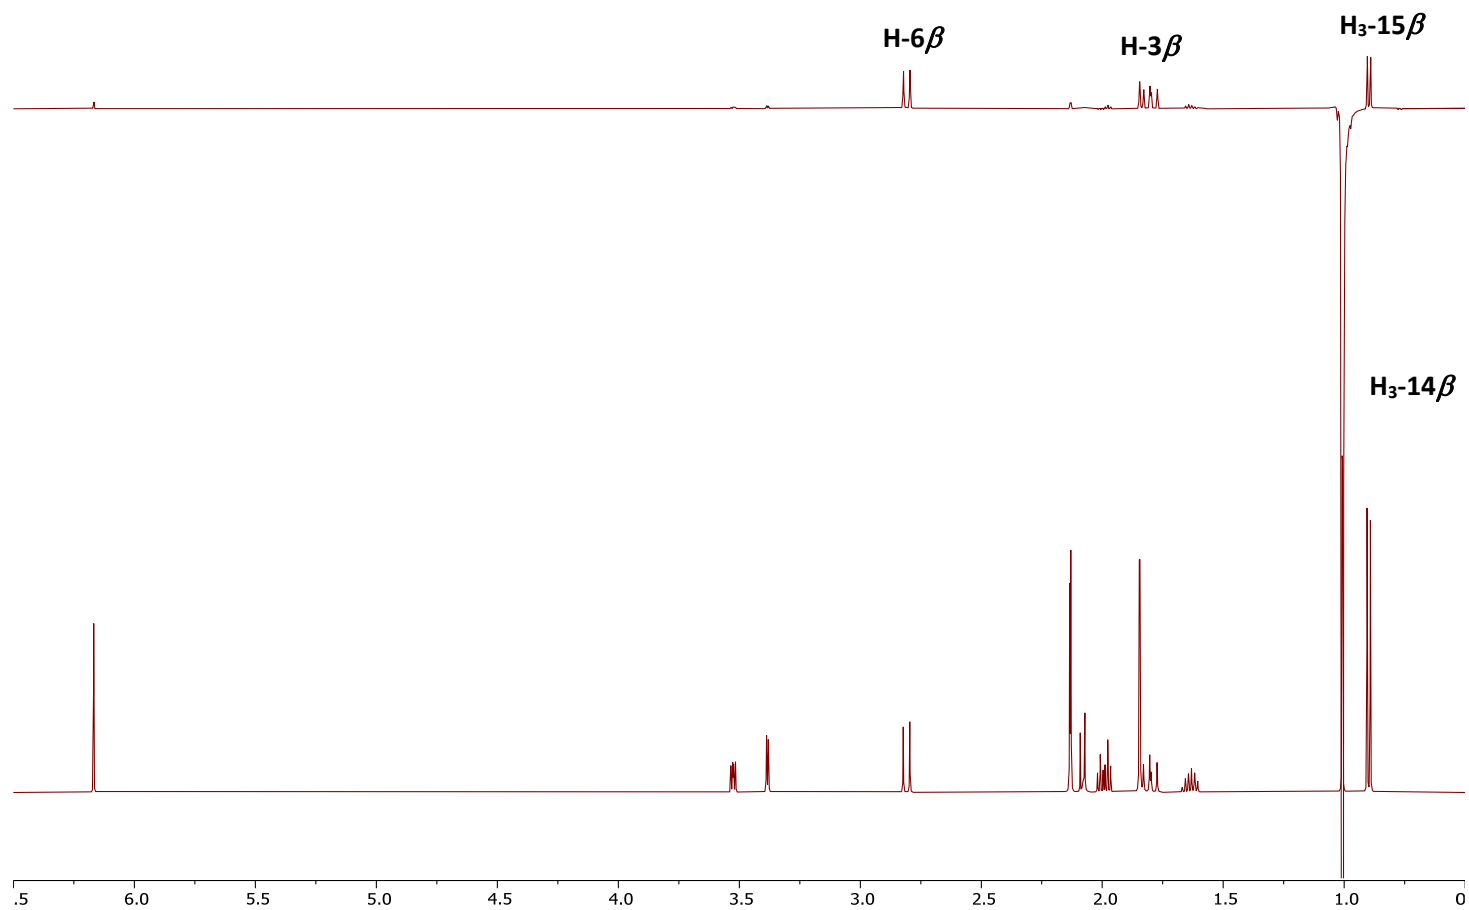

**Figure S6f.** 1D NOESY spectrum of compound **1**.

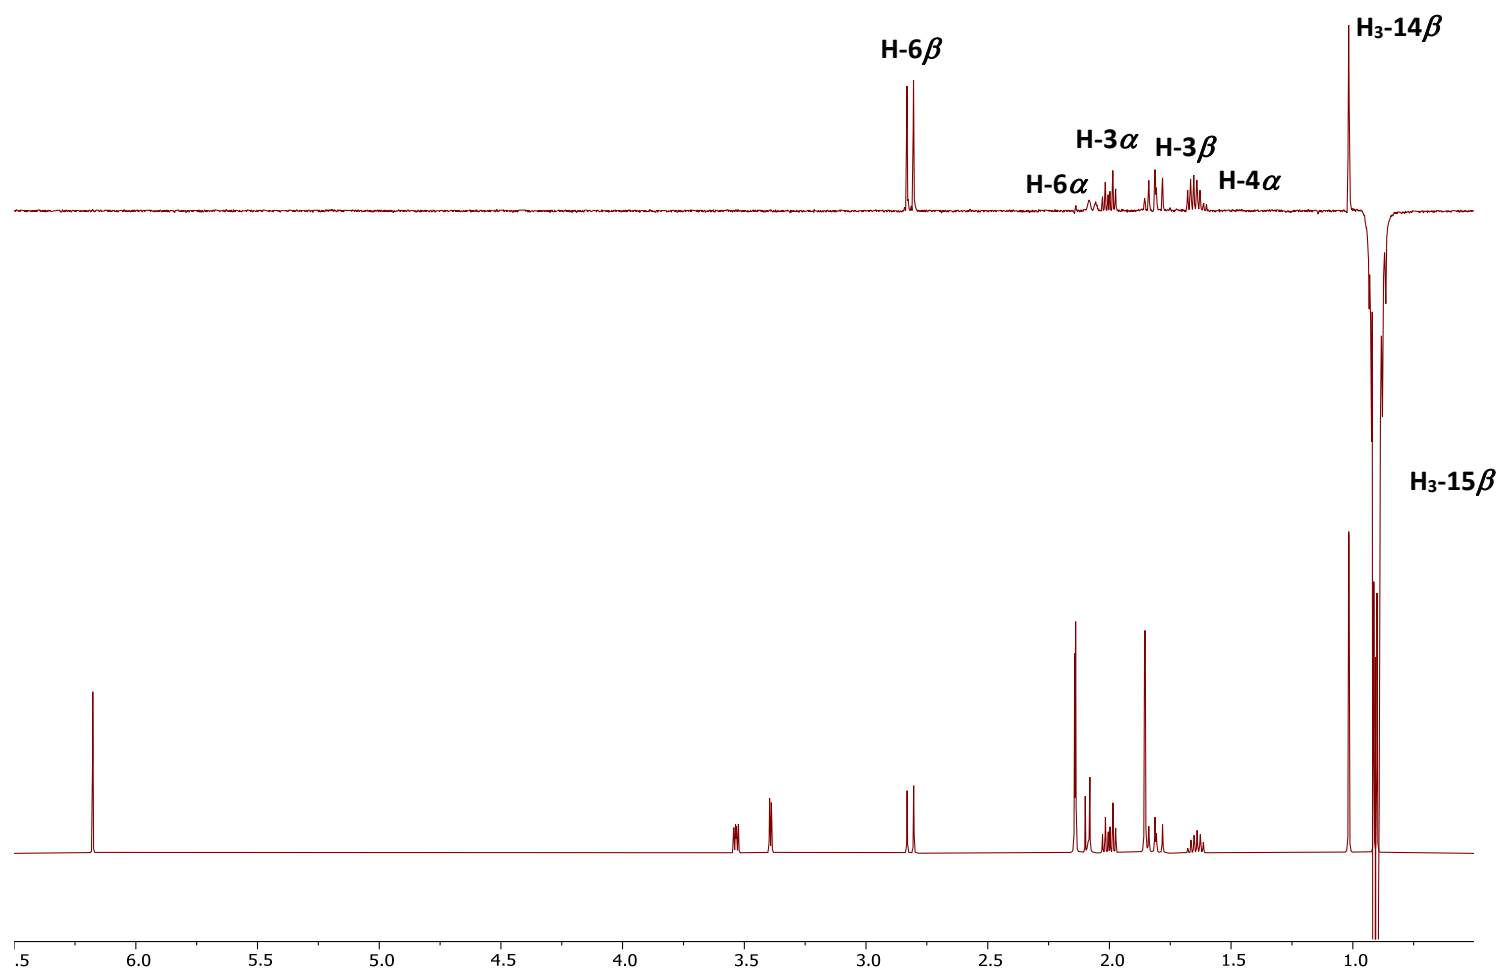

**Figure S6g.** 1D NOESY spectrum of compound **1**.

## Single Mass Analysis

Tolerance = 5.0 mDa / DBE: min = -1.5, max = 80.0

Element prediction: Off

Number of isotope peaks used for i-FIT = 3

Monoisotopic Mass, Even Electron Ions

65 formula(e) evaluated with 2 results within limits (up to 5 closest results for each mass)

Elements Used:

C: 0-100 H: 0-100 O: 0-20 Na: 0-1

ROSA DURAN

CARLOS-4-F30 371 (4.271)

1: TOF MS ES+  
1.50e+006

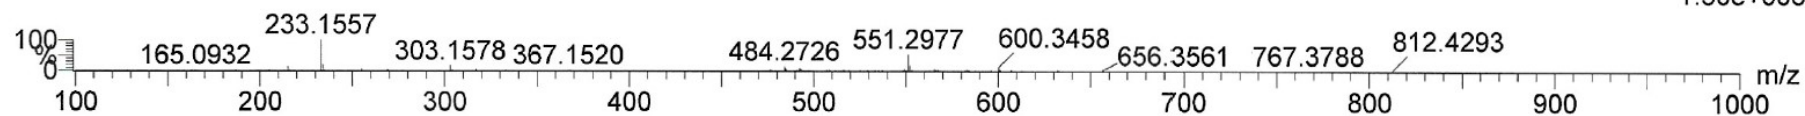

Minimum: -1.5  
Maximum: 5.0 5.0 80.0

| Mass     | Calc. Mass | mDa | PPM  | DBE | i-FIT | Norm  | Conf (%) | Formula       |
|----------|------------|-----|------|-----|-------|-------|----------|---------------|
| 233.1557 | 233.1542   | 1.5 | 6.4  | 5.5 | 802.2 | 0.032 | 96.84    | C15 H21 O2    |
|          | 233.1517   | 4.0 | 17.2 | 2.5 | 805.6 | 3.453 | 3.16     | C13 H22 O2 Na |

Figure S7. HRESIMS spectrum of compound 1.

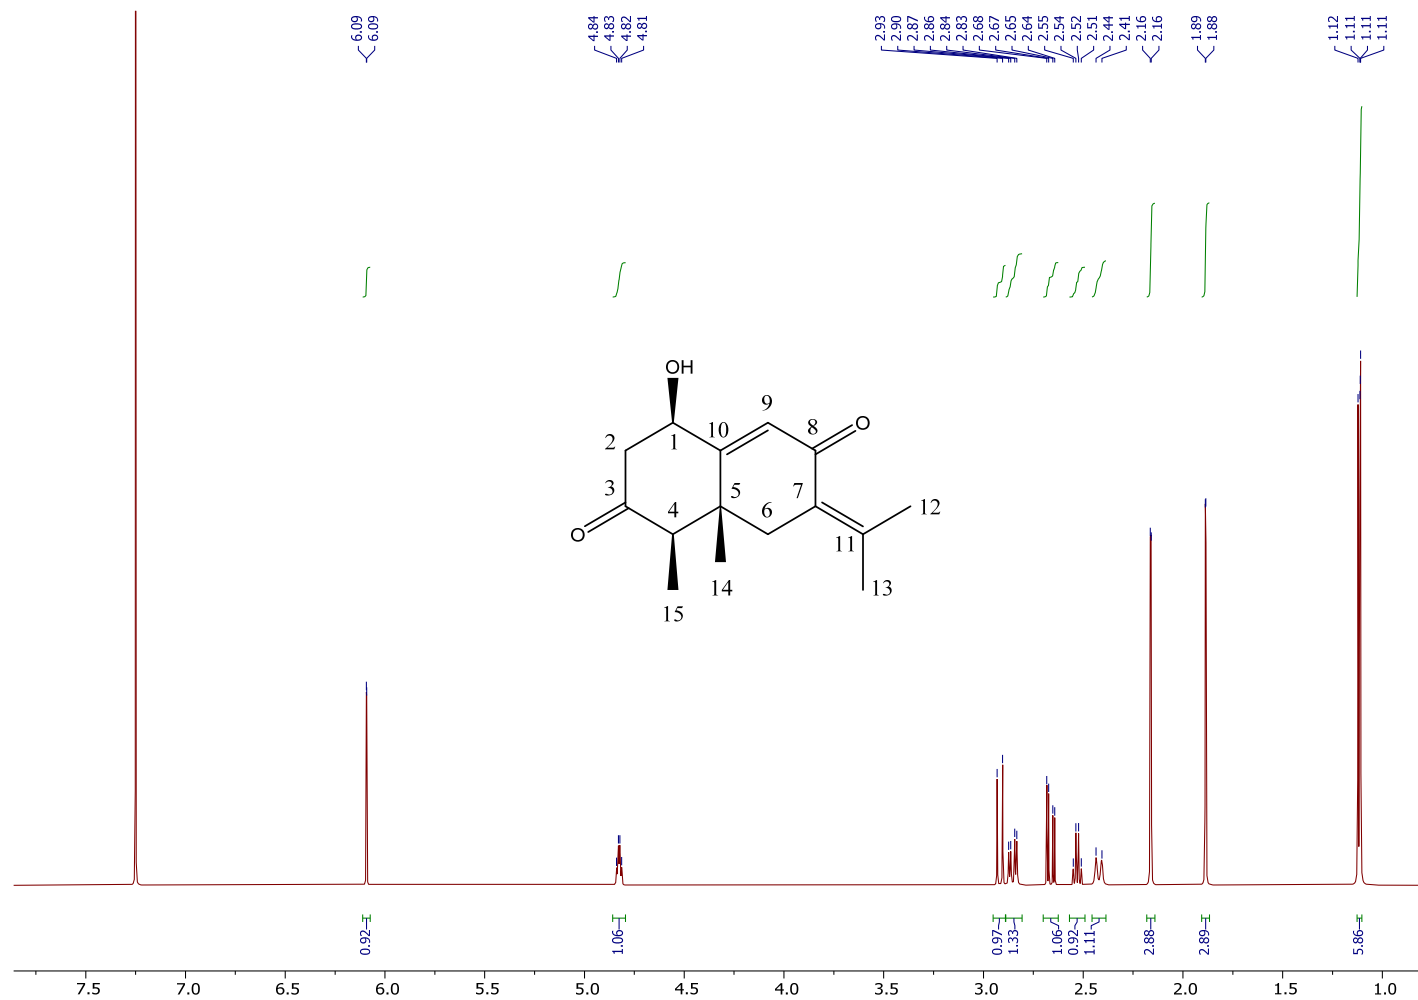

**Figure S8.**  $^1\text{H}$  NMR spectrum (500 MHz,  $\text{CDCl}_3$ ) of compound **2**.

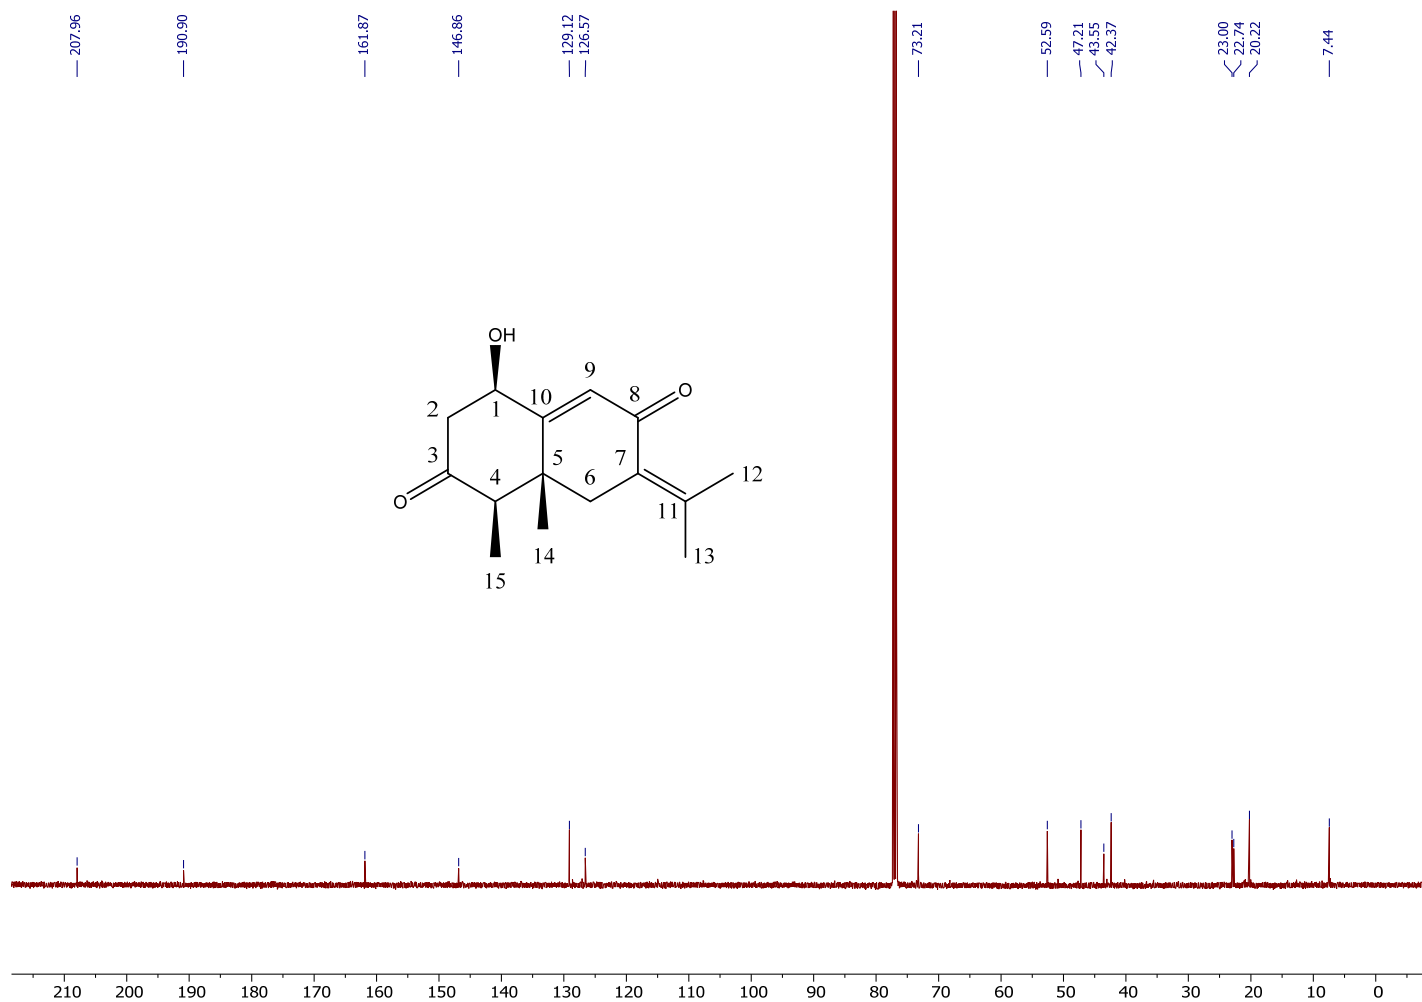

**Figure S9.** <sup>13</sup>C NMR spectrum (125 MHz, CDCl<sub>3</sub>) of compound 2.



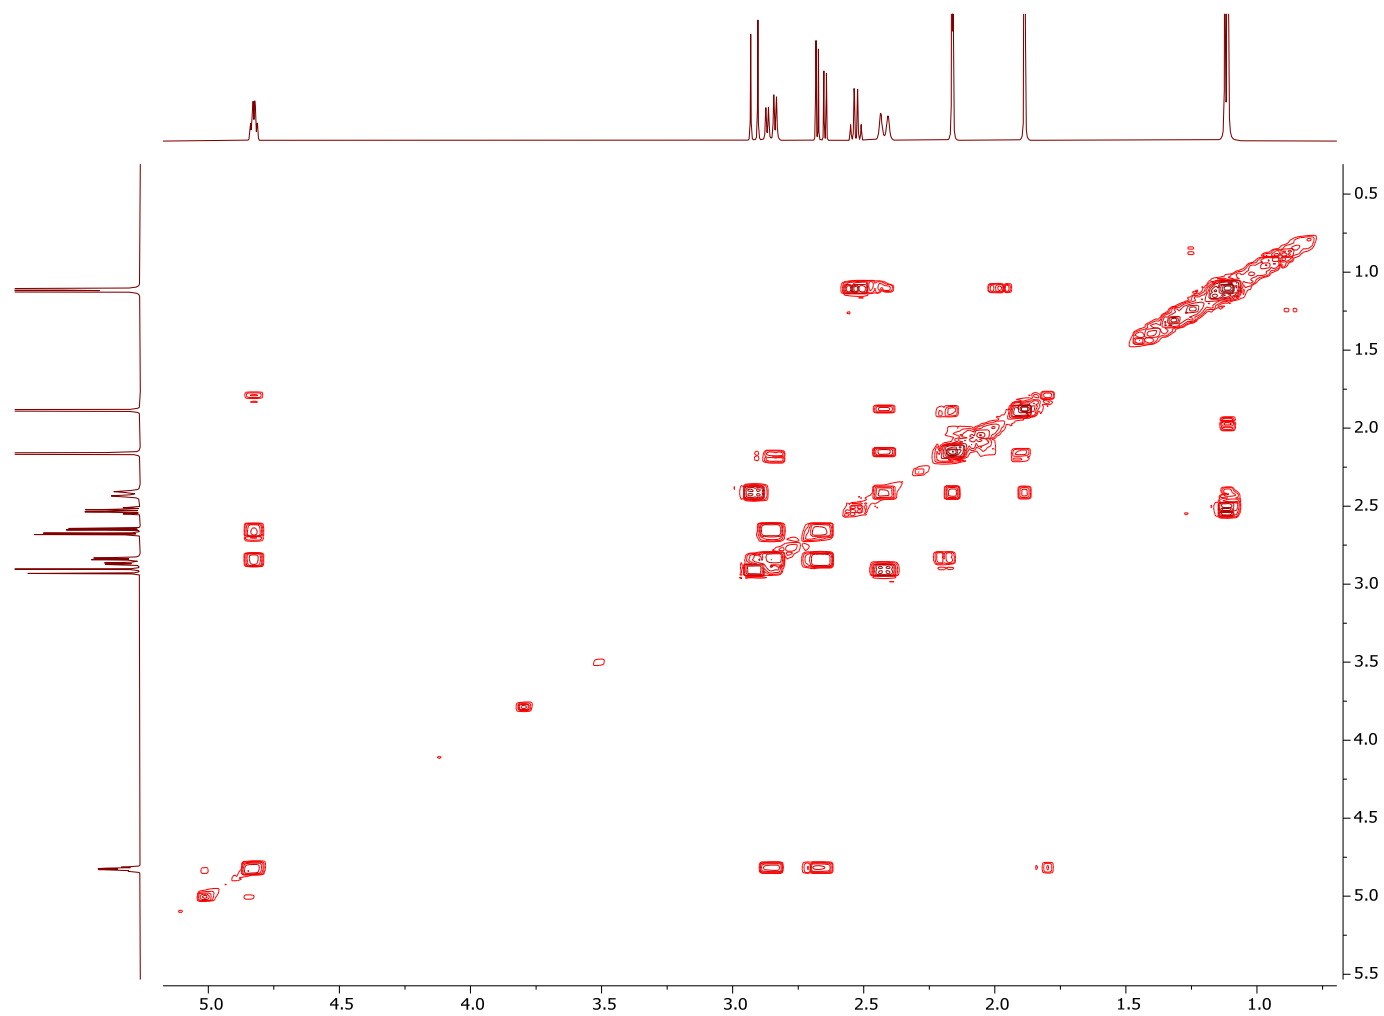

**Figure S10.** gCOSY spectrum of compound **2**.

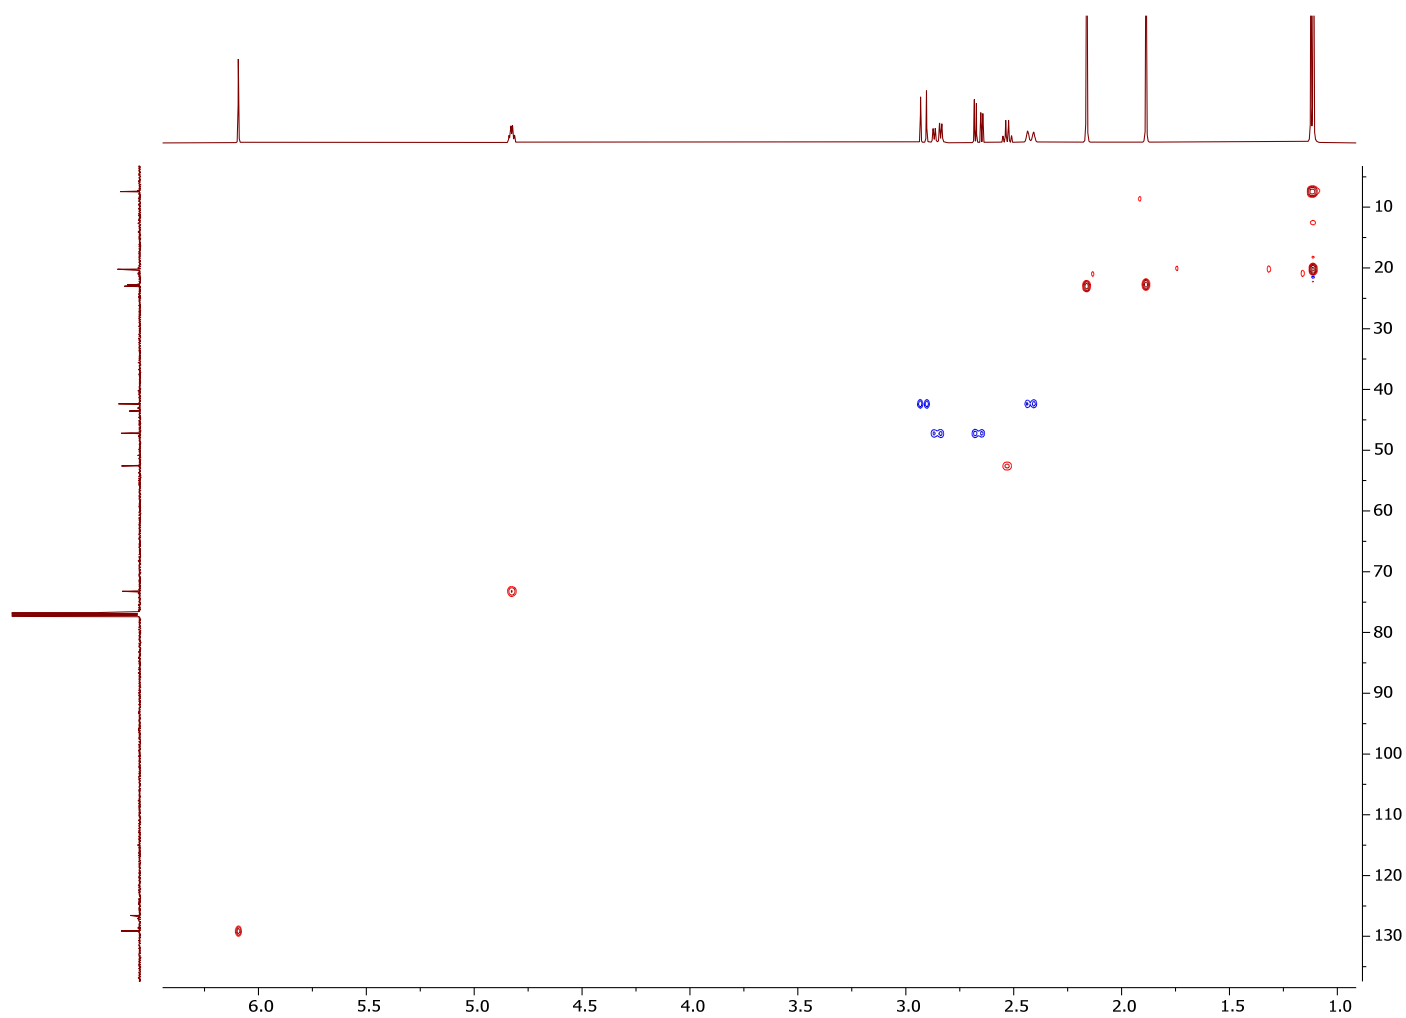

**Figure S11.** gHSQC spectrum of compound **2**.

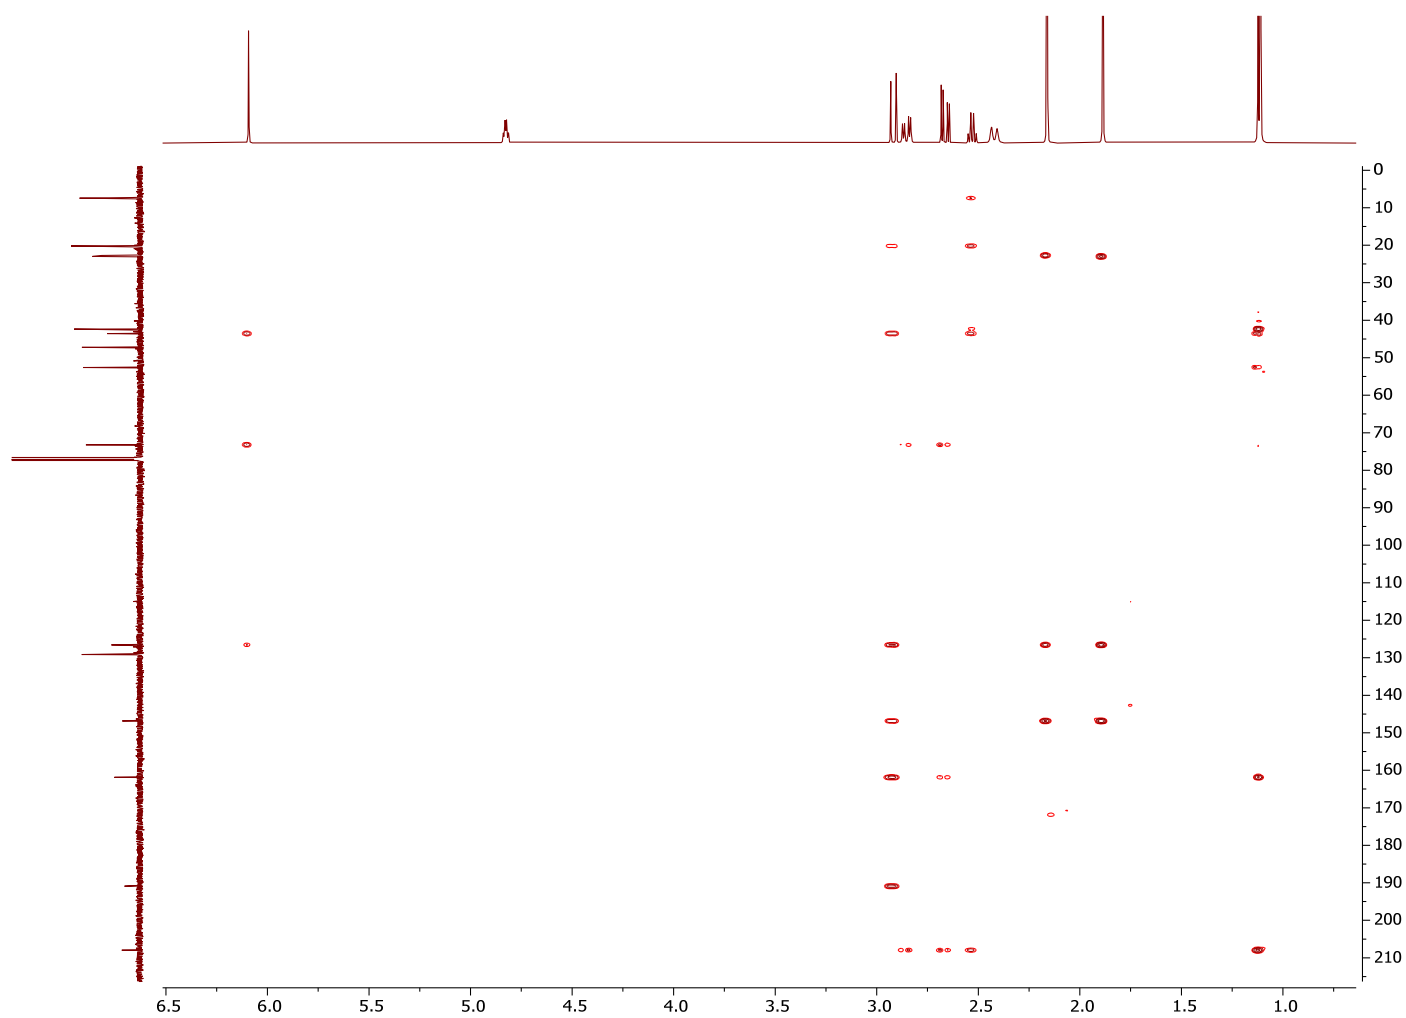

**Figure S12.** gHMBC spectrum of compound **2**.

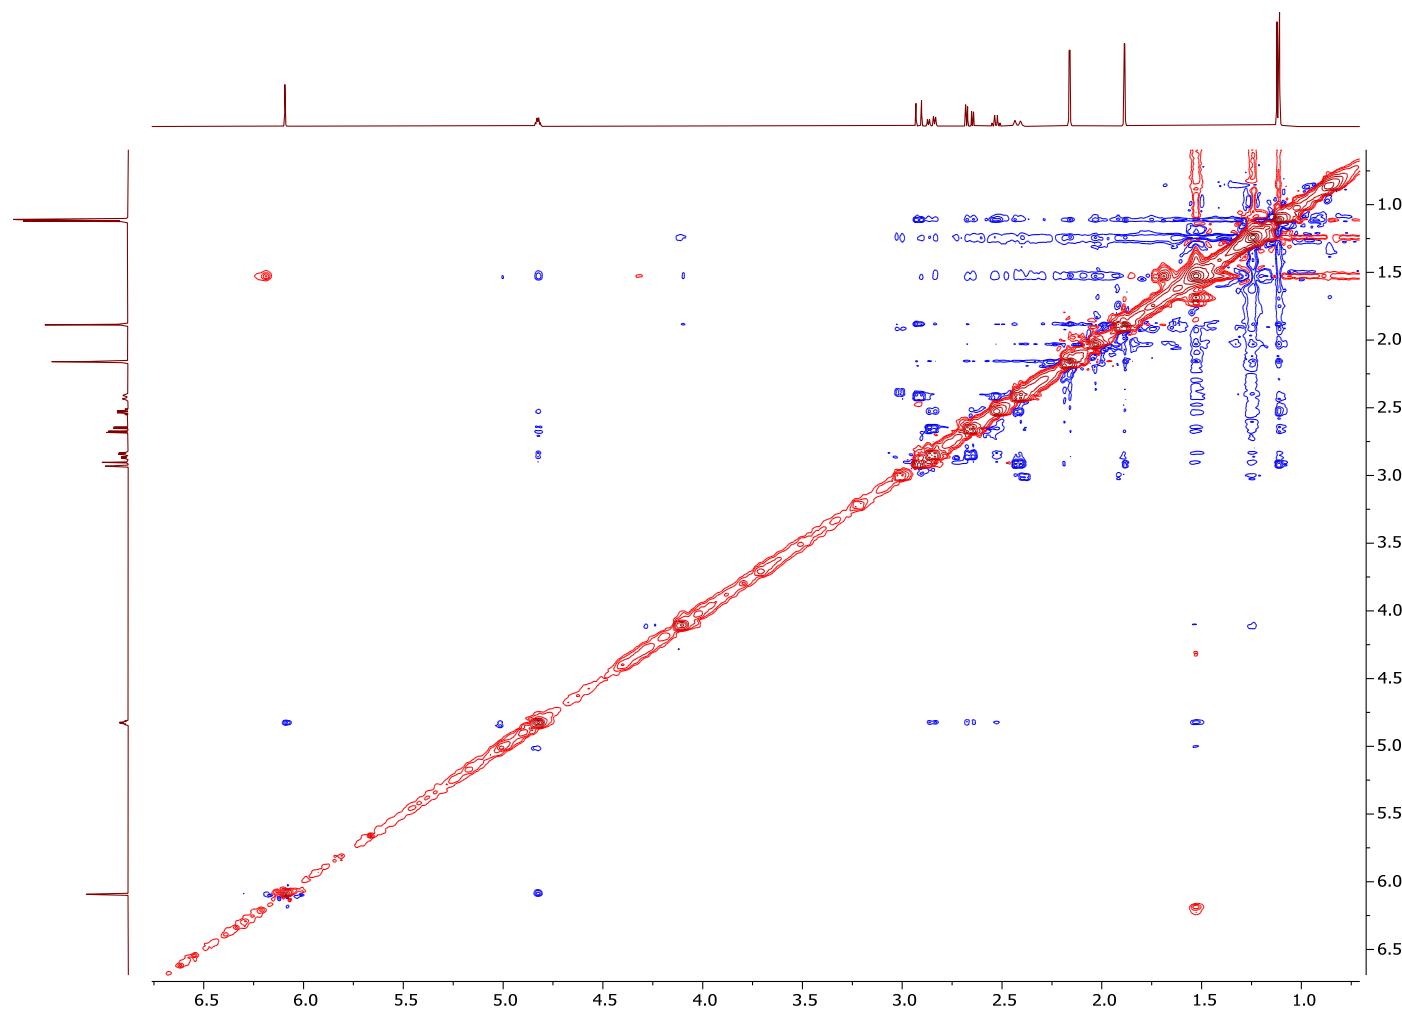

**Figure S13.** 2D NOESY spectrum of compound **2**.

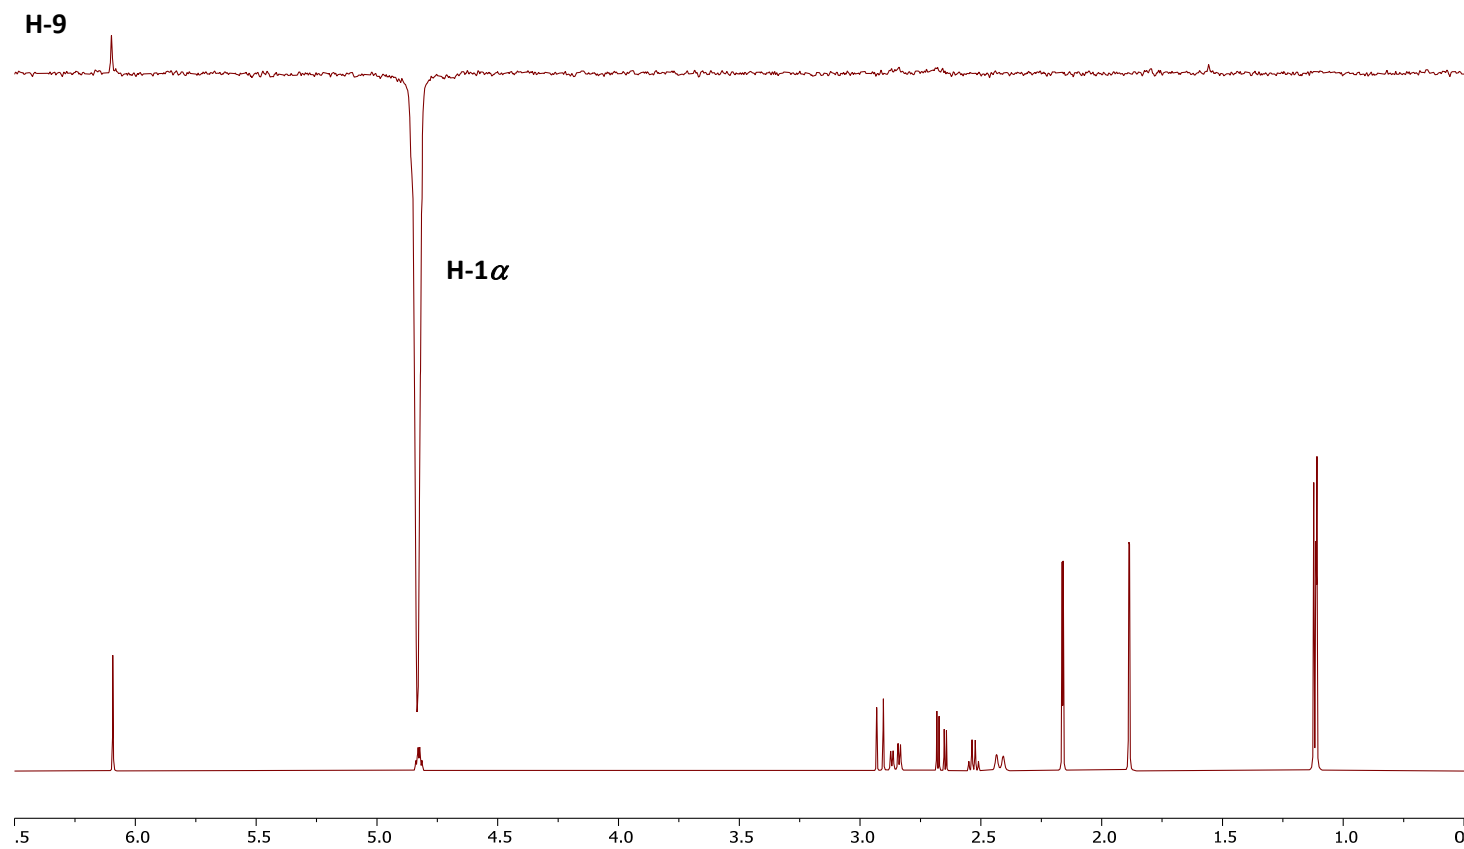

**Figure S14a.** 1D NOESY spectrum of compound **2**.

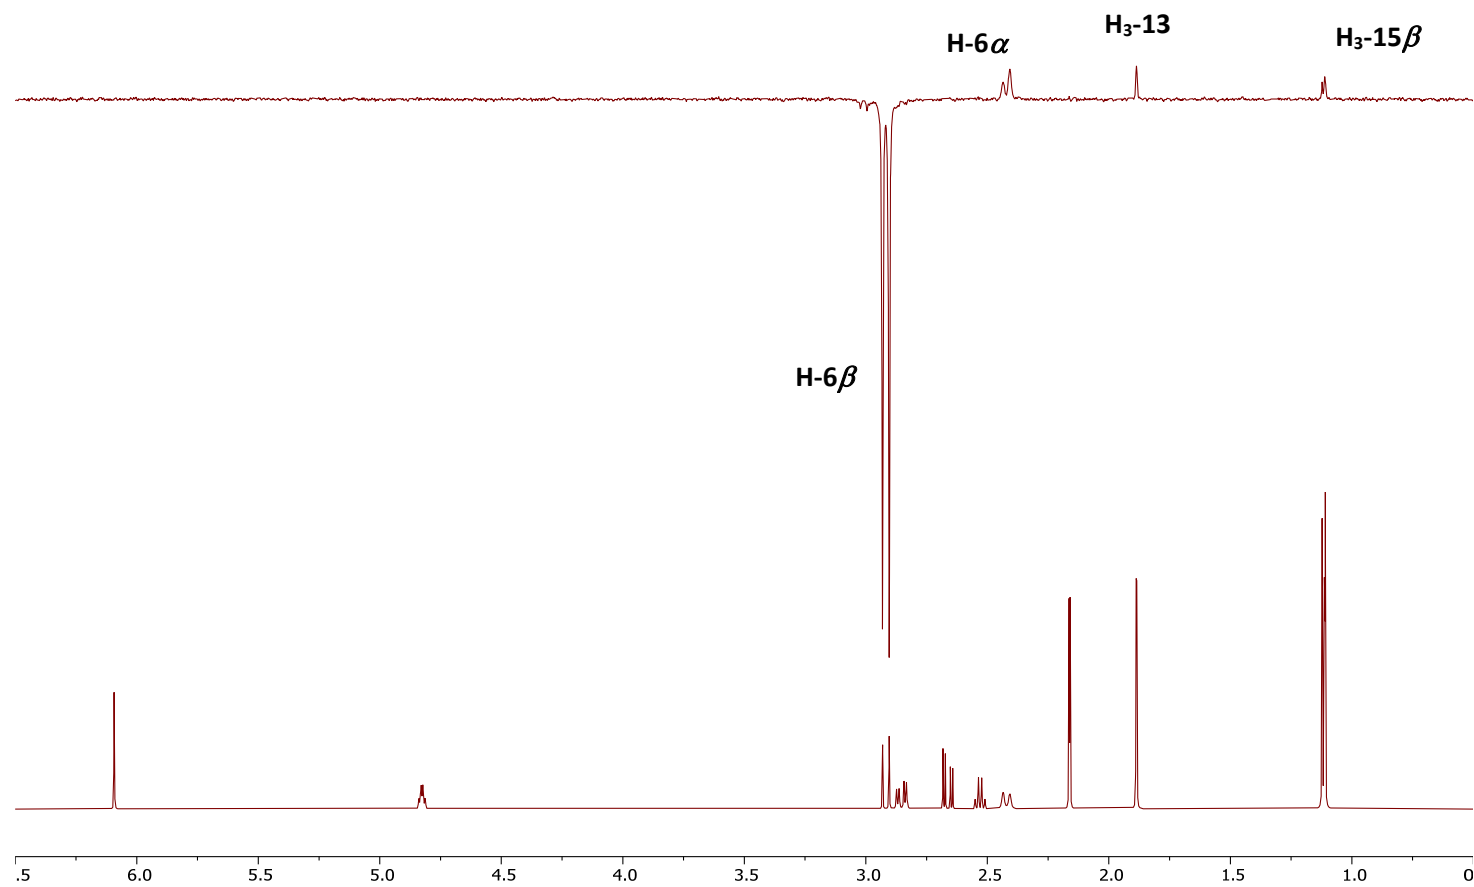

**Figure S14b.** 1D NOESY spectrum of compound **2**.

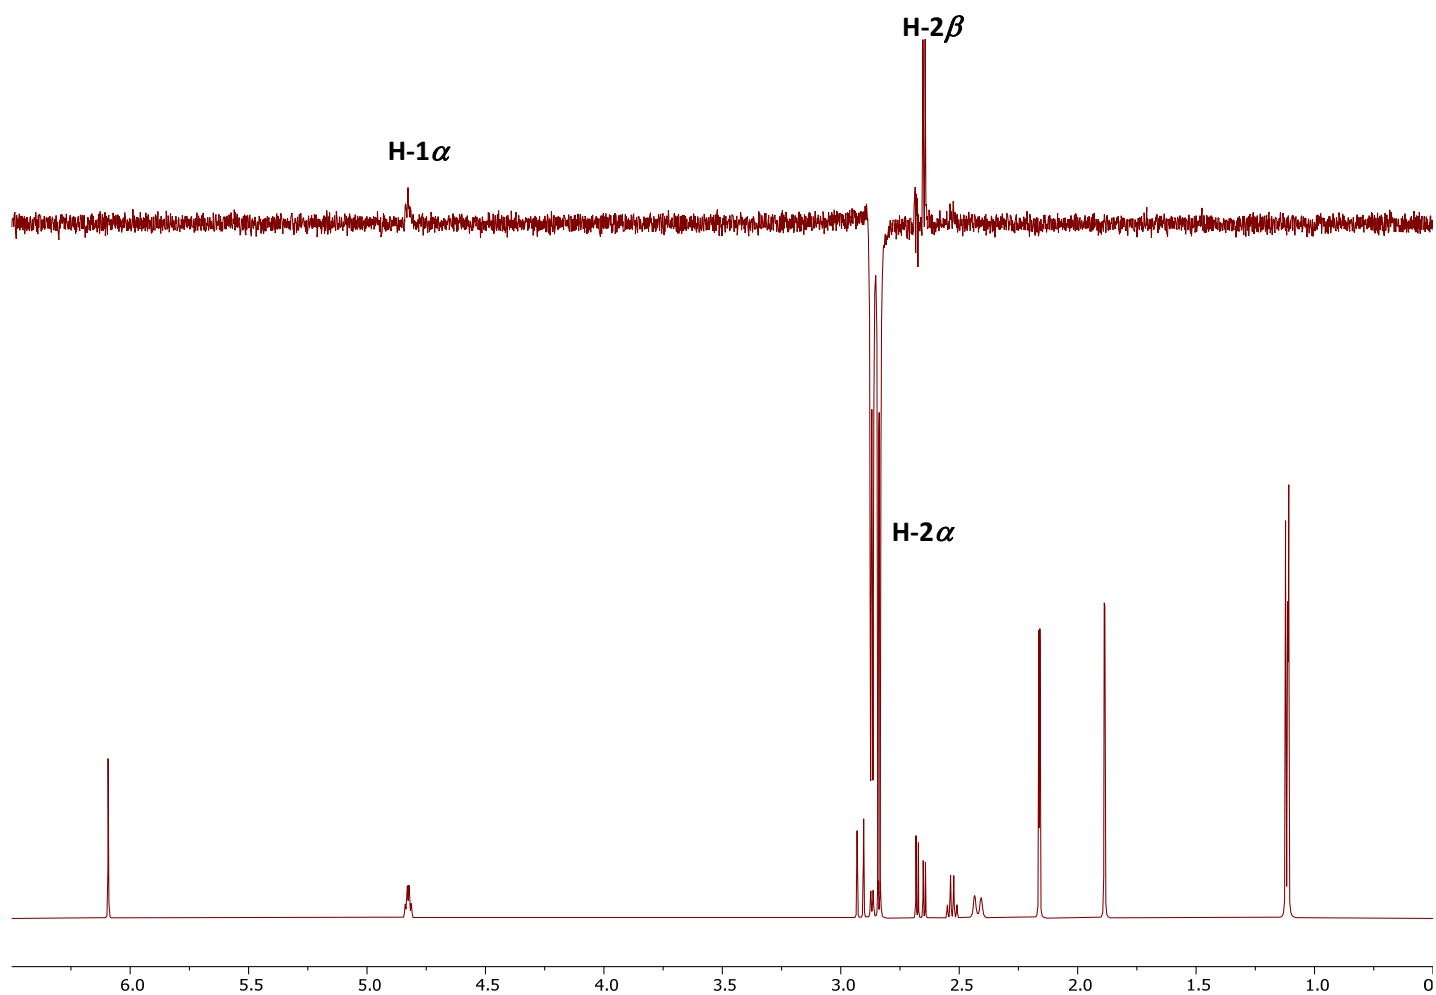

**Figure S14c.** 1D NOESY spectrum of compound **2**.

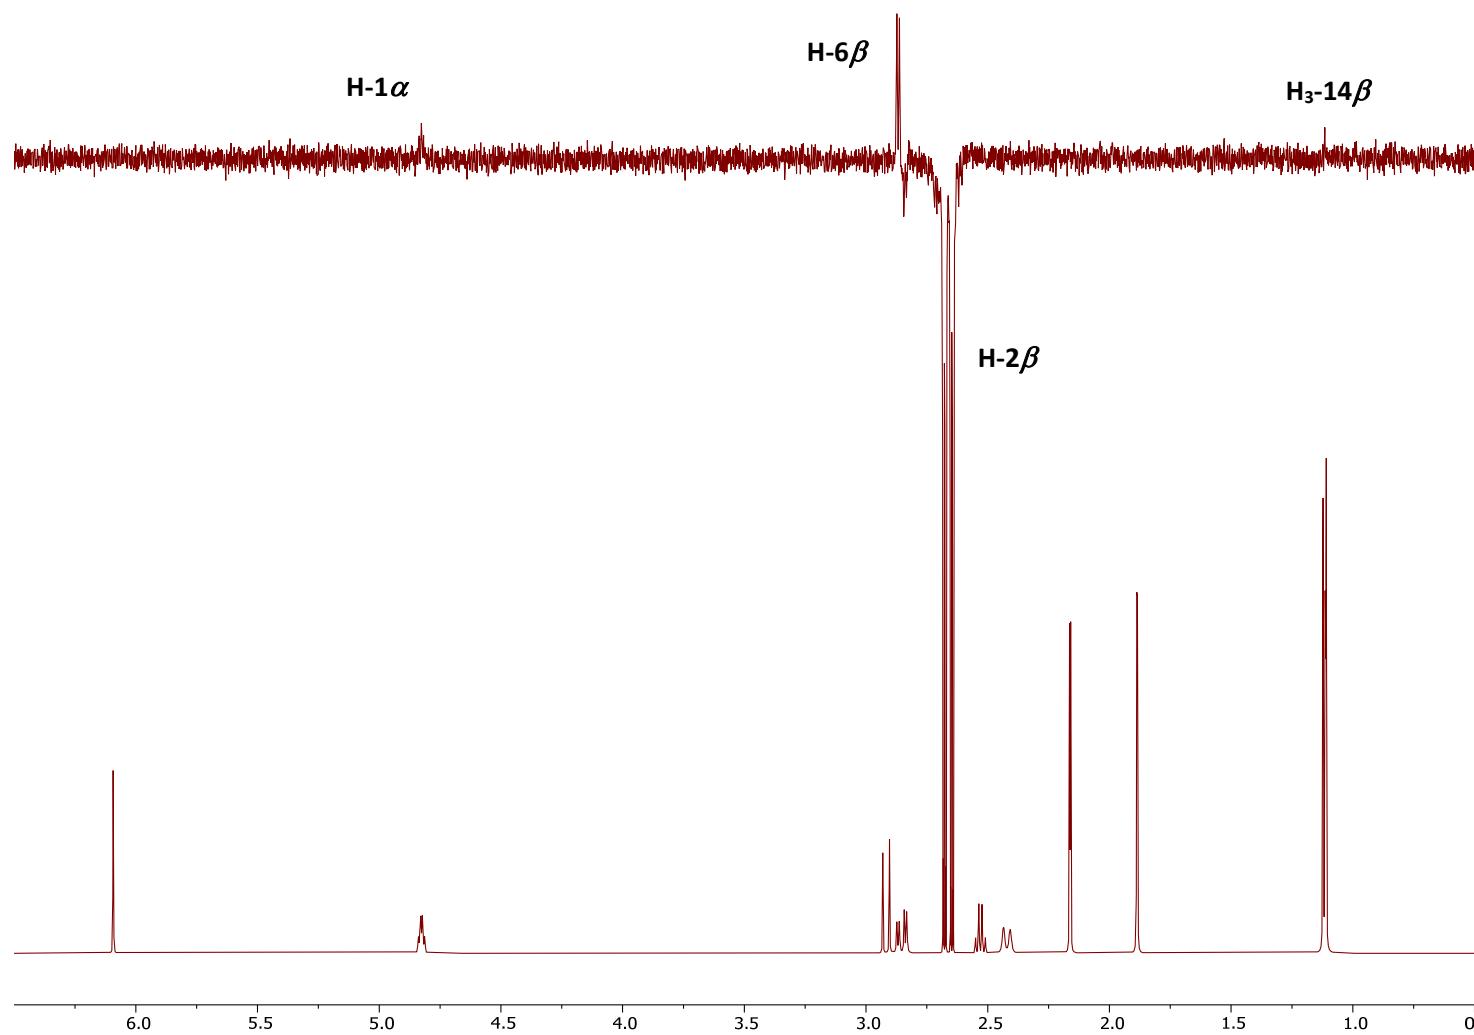

**Figure S14d.** 1D NOESY spectrum of compound **2**.



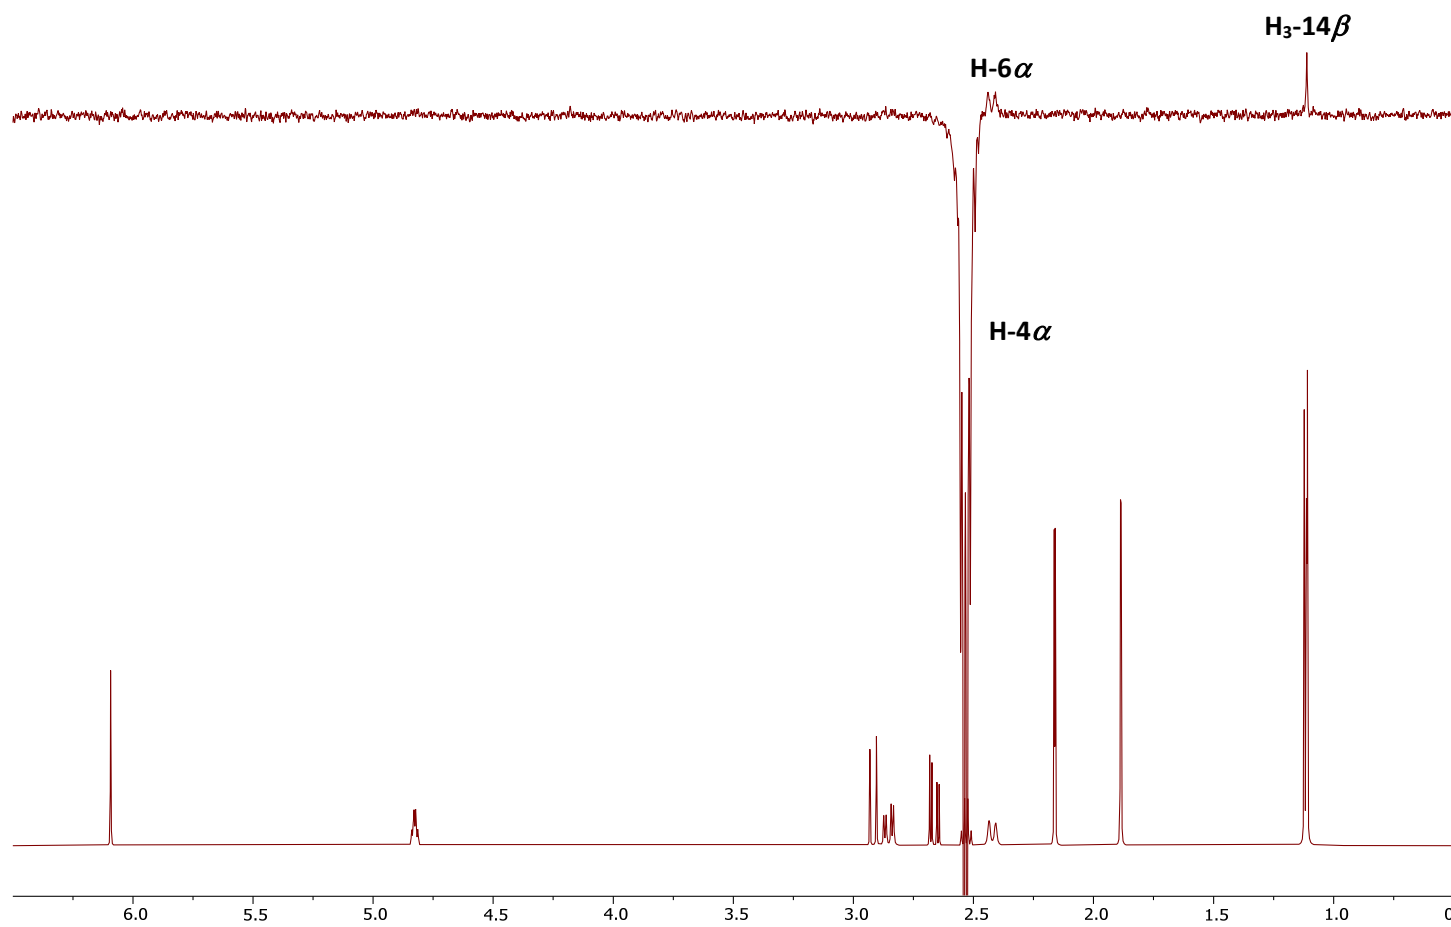

**Figure S14e.** 1D NOESY spectrum of compound **2**.

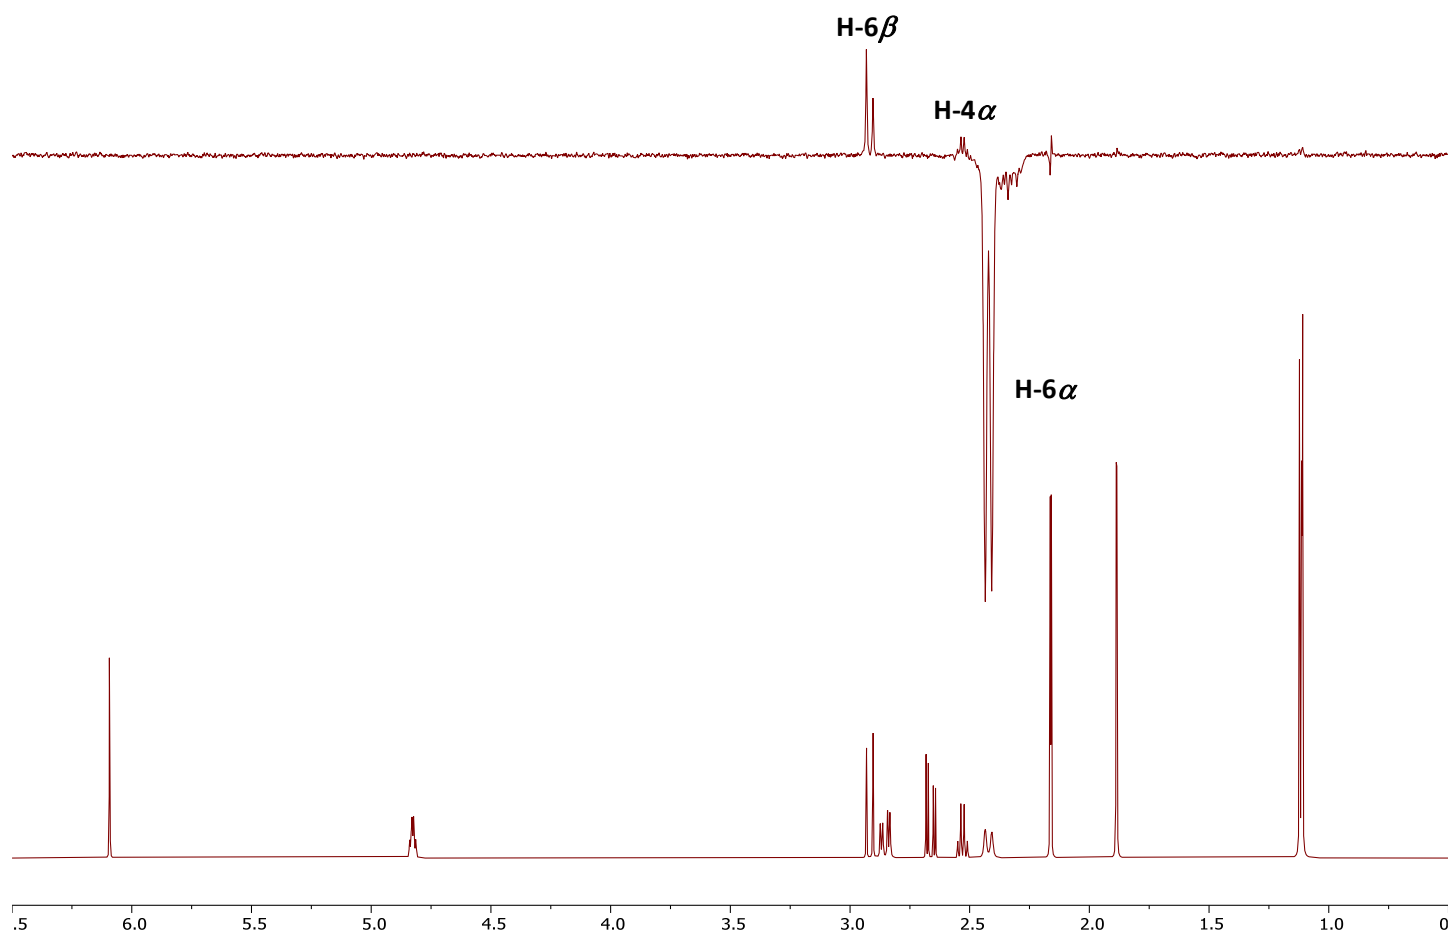

**Figure S14f.** 1D NOESY spectrum of compound **2**.

## Single Mass Analysis

Tolerance = 5.0 mDa / DBE: min = -1.5, max = 80.0

Element prediction: Off

Number of isotope peaks used for i-FIT = 3

Monoisotopic Mass, Even Electron Ions

197 formula(e) evaluated with 1 results within limits (up to 5 closest results for each mass)

Elements Used:

C: 0-100 H: 0-100 O: 0-50 Cl: 0-20 Br: 0-8

2-15-F50-NEG 72 (1.335)

1: TOF MS ES-

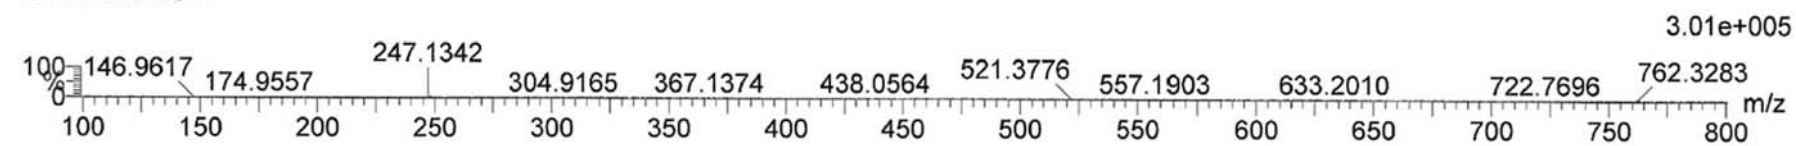

Minimum: -1.5  
Maximum: 5.0 5.0 80.0

| Mass     | Calc. Mass | mDa | PPM | DBE | i-FIT | Norm | Conf (%) | Formula    |
|----------|------------|-----|-----|-----|-------|------|----------|------------|
| 247.1342 | 247.1334   | 0.8 | 3.2 | 6.5 | 289.6 | n/a  | n/a      | C15 H19 O3 |

Figure S15. HRESIMS spectrum of compound 2.

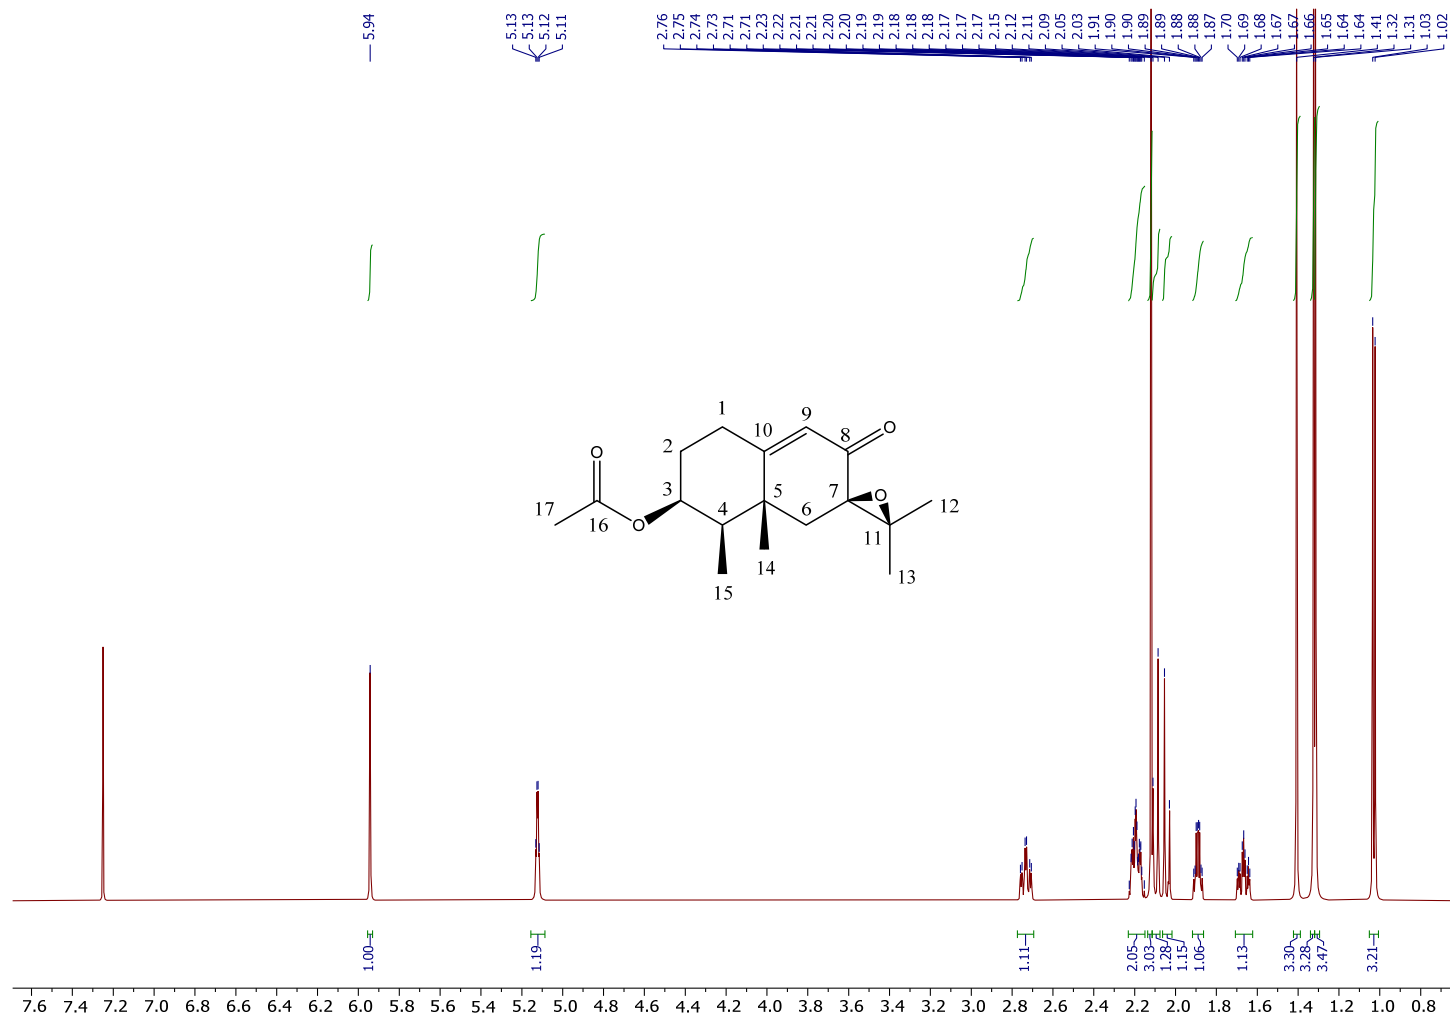

Figure S16.  $^1\text{H}$  NMR (400 MHz,  $\text{CDCl}_3$ ) spectrum of compound 3.

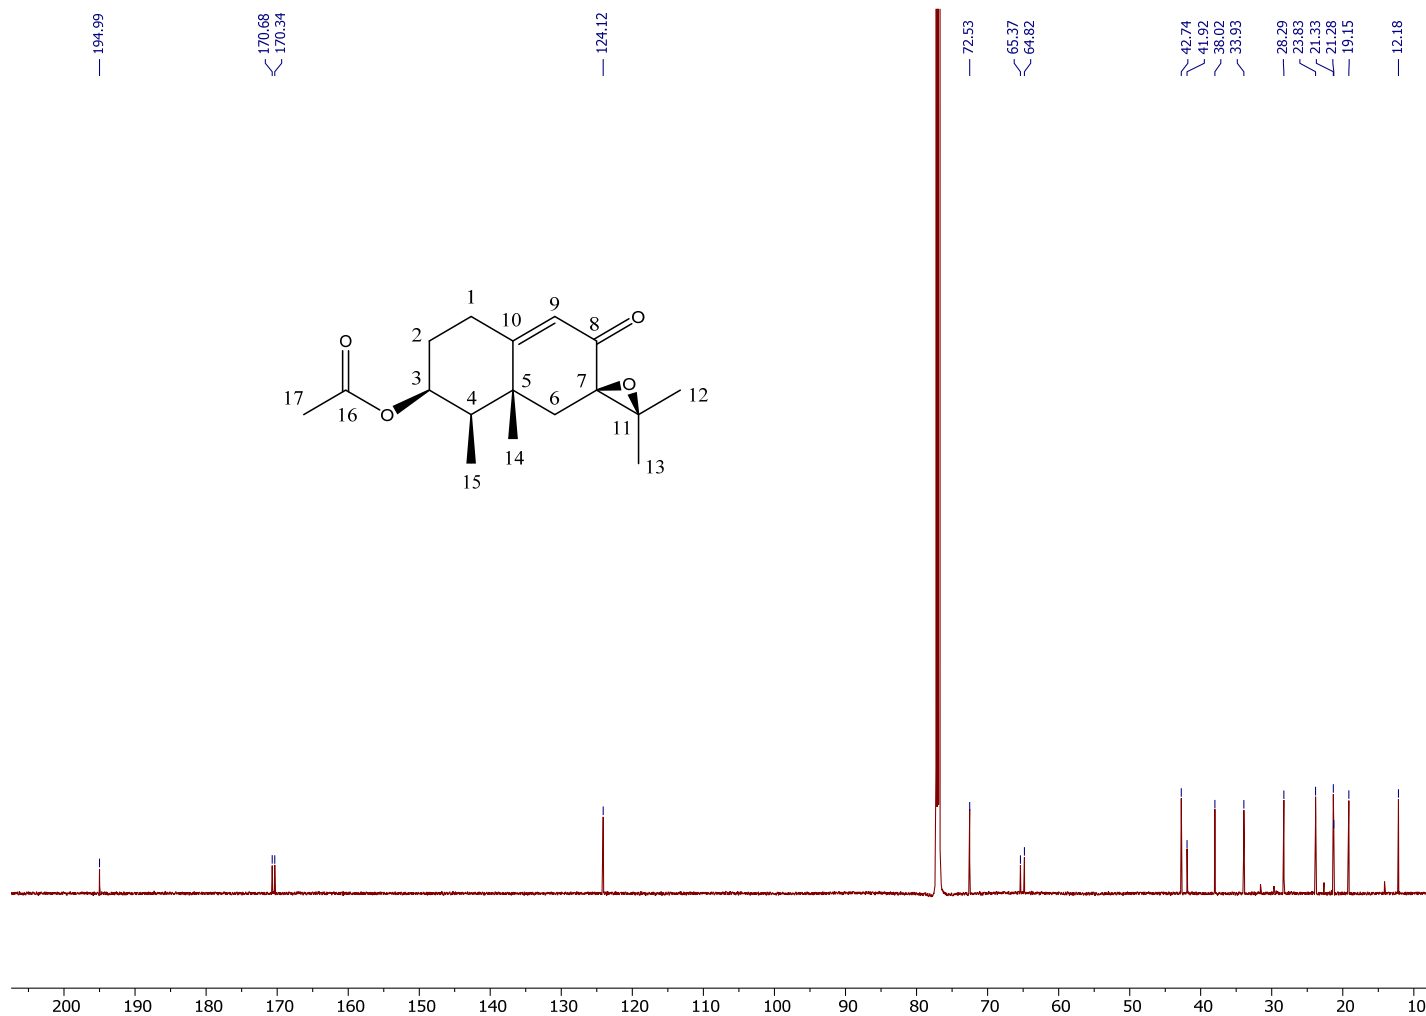

**Figure S17.**  $^{13}\text{C}$  NMR (100 MHz,  $\text{CDCl}_3$ ) spectrum of compound **3**.

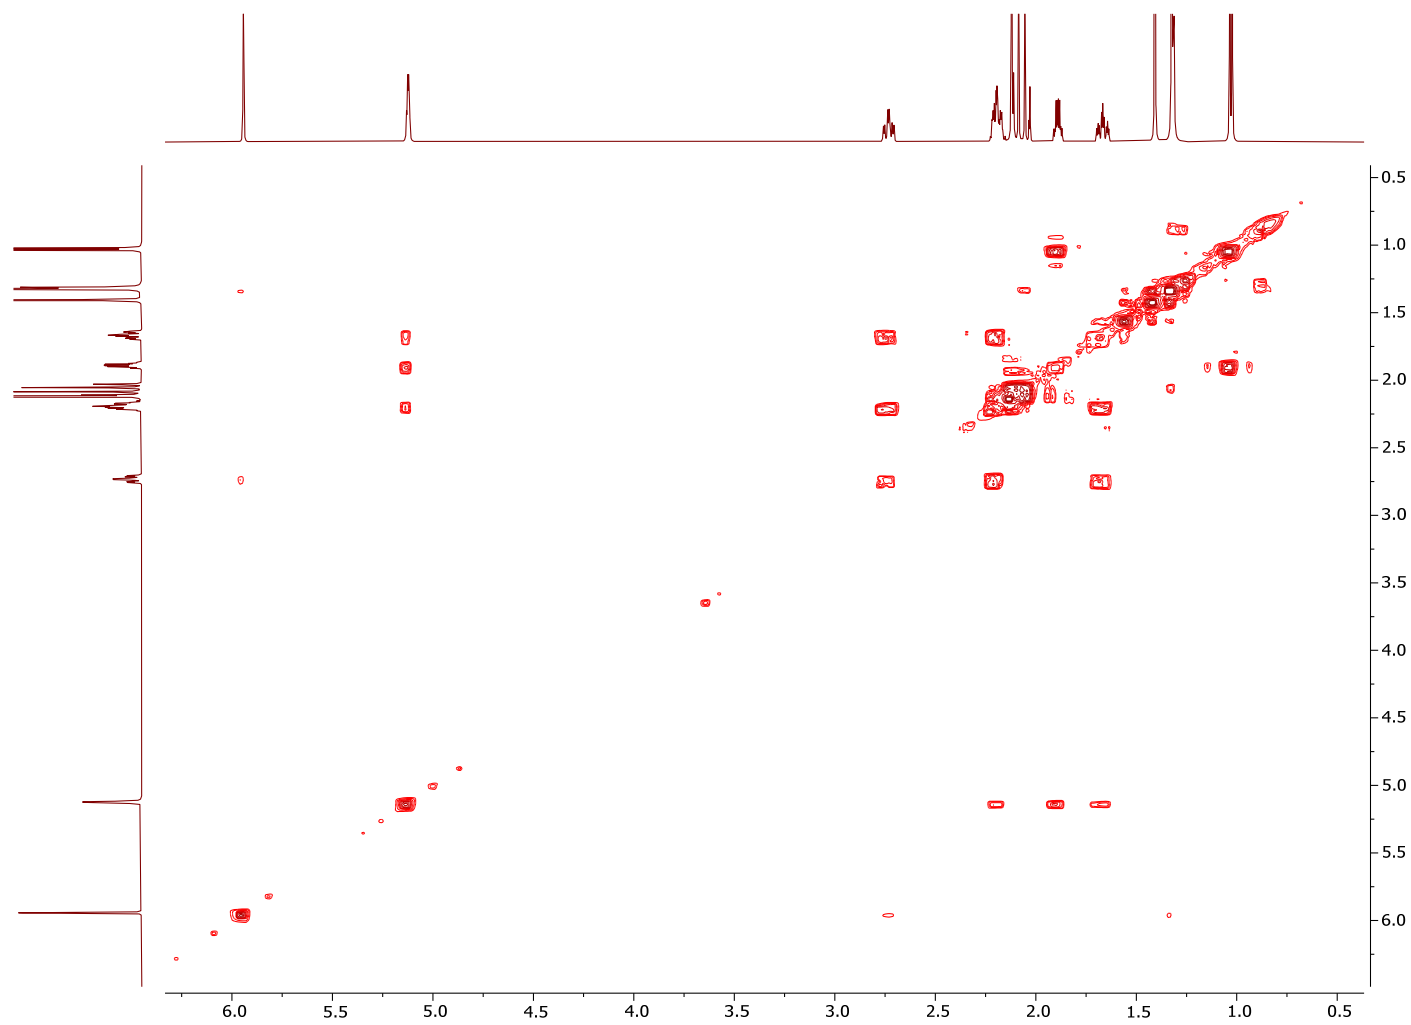

**Figure S18.** gCOSY spectrum of compound **3**.

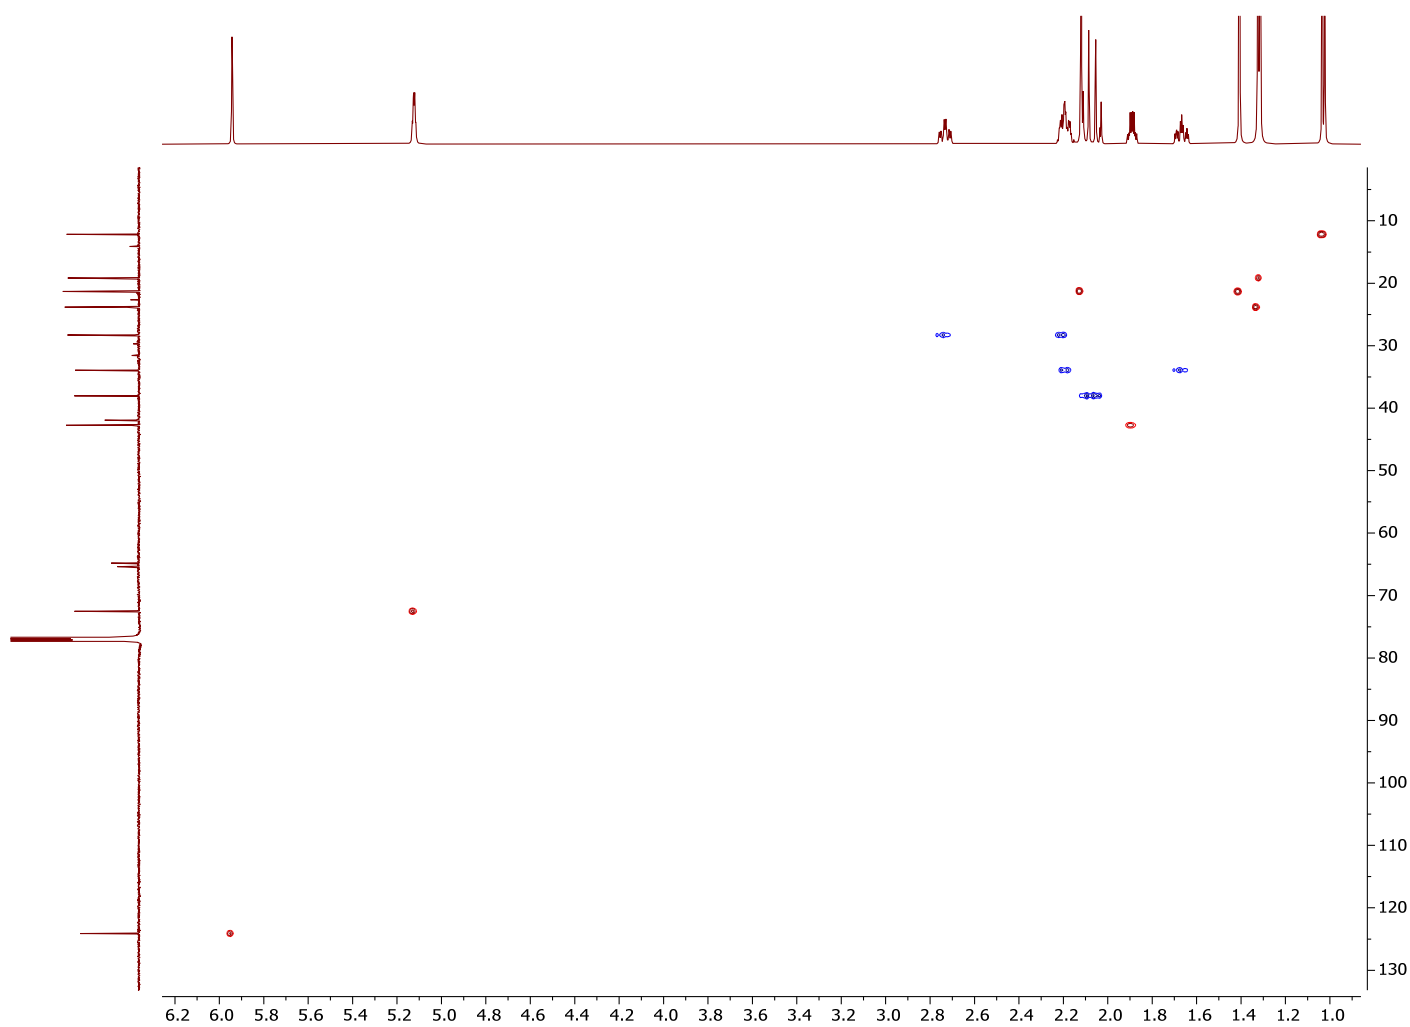

**Figure S19.** gHSQC spectrum of compound **3**.

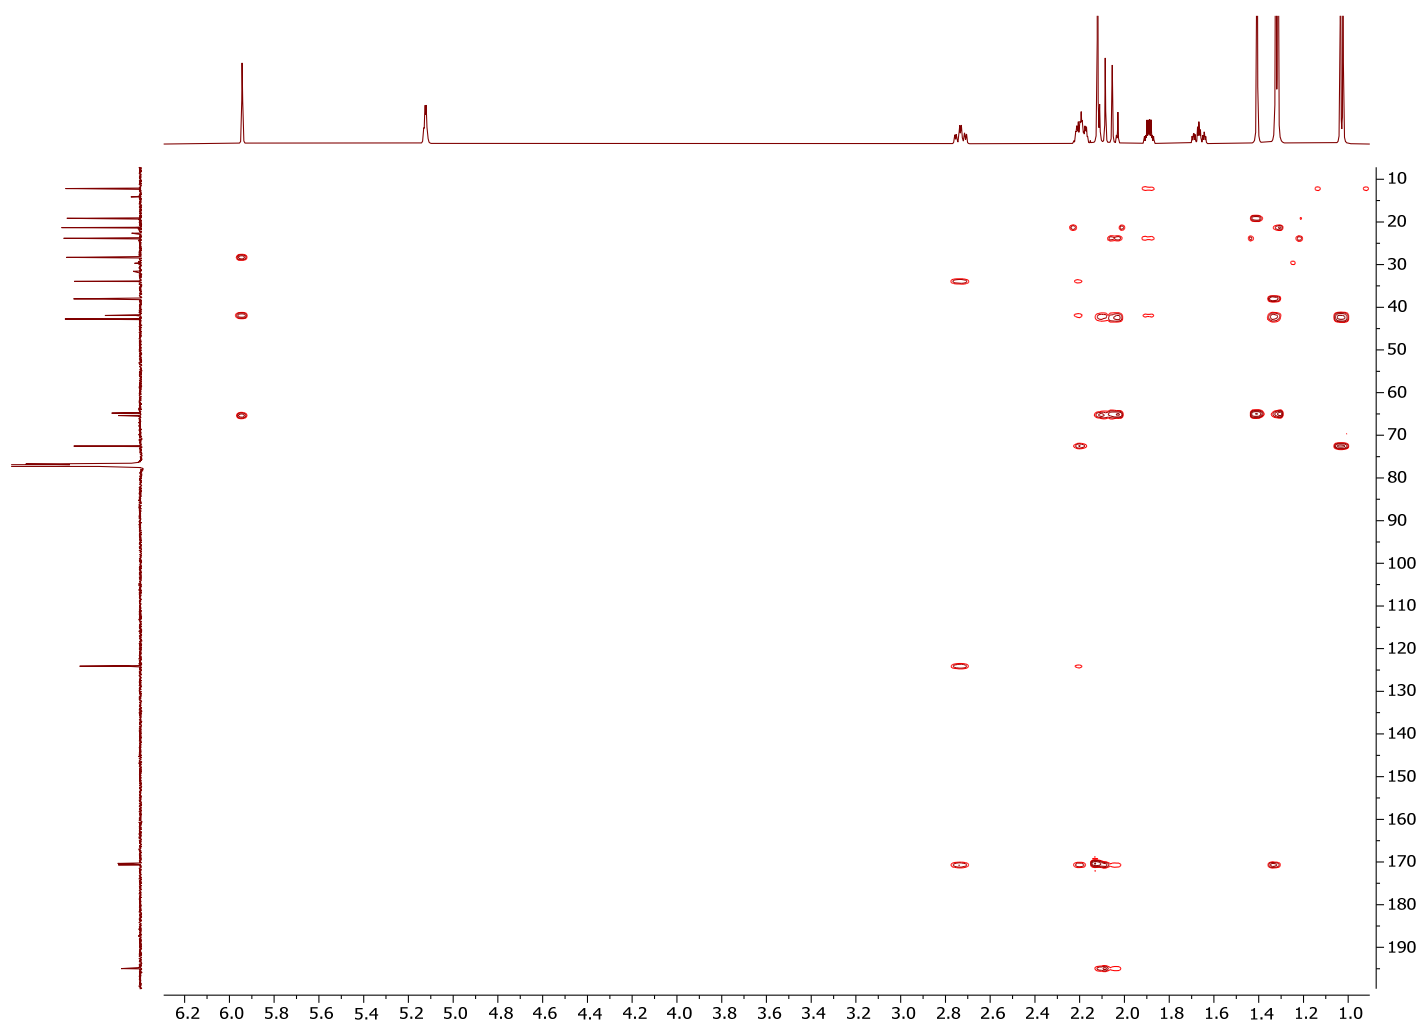

**Figure S20.** gHMBC spectrum of compound **3**.



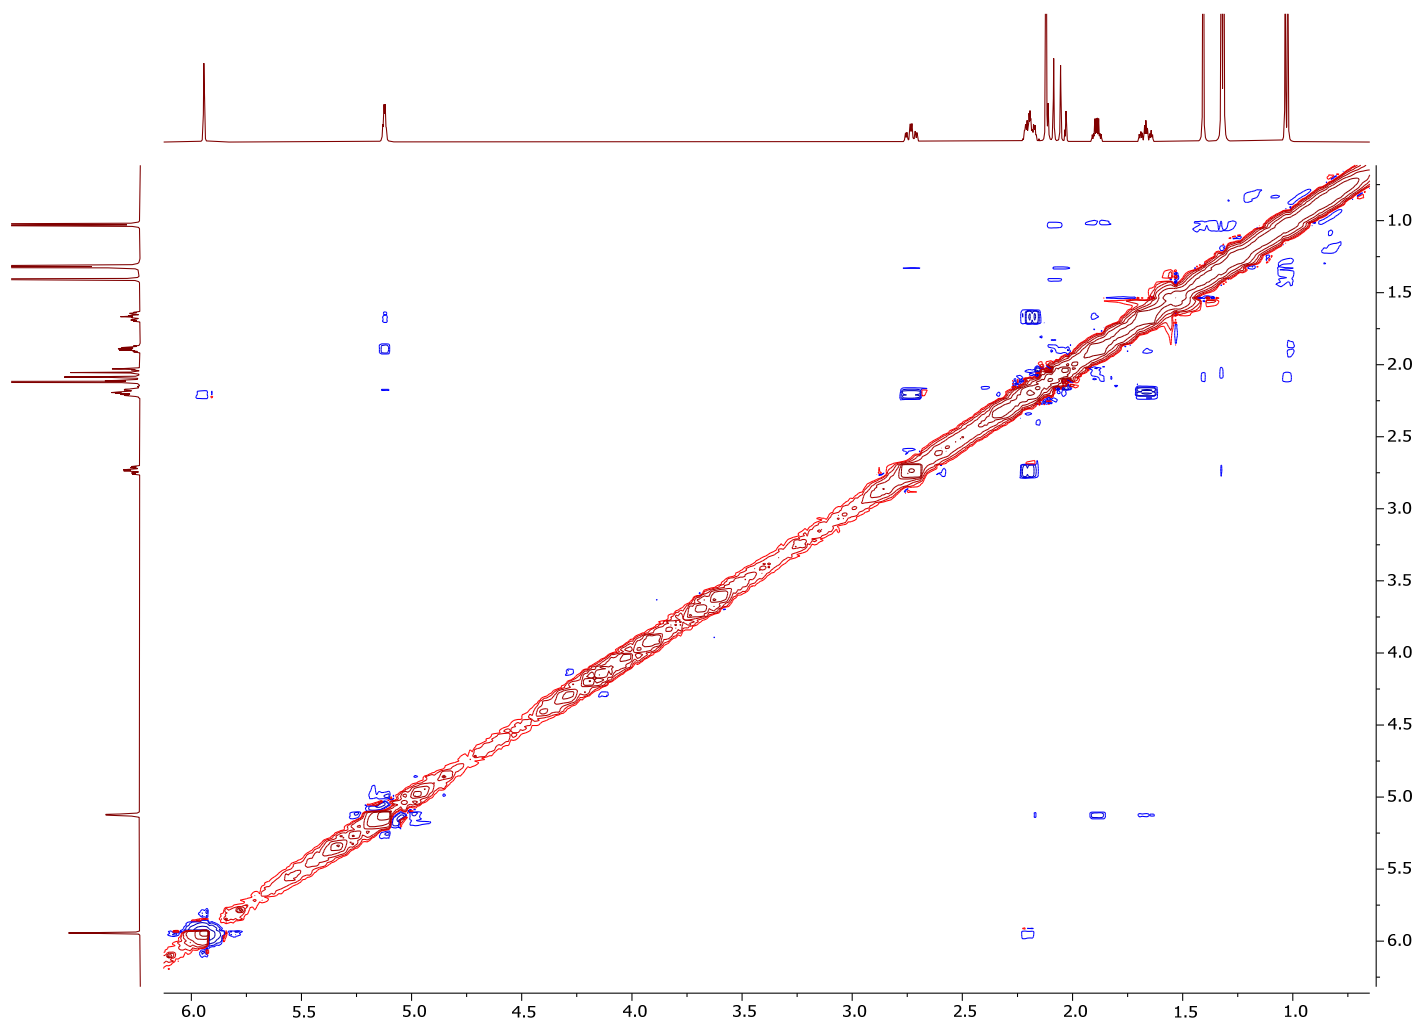

**Figure S21.** 2D NOESY spectrum of compound **3**.

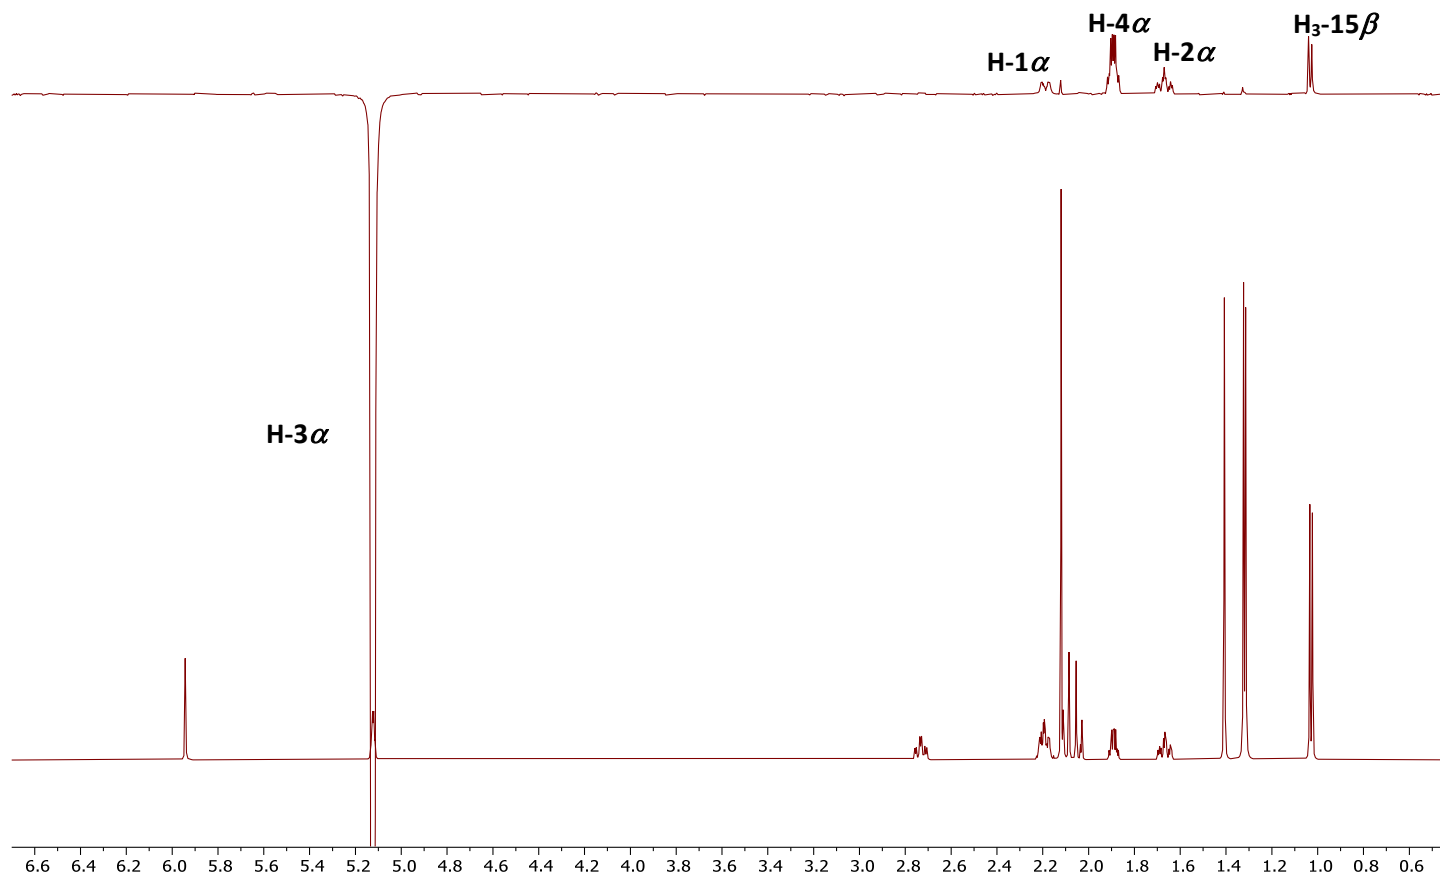

**Figure S22a.** 1D NOESY spectrum of compound **3**.

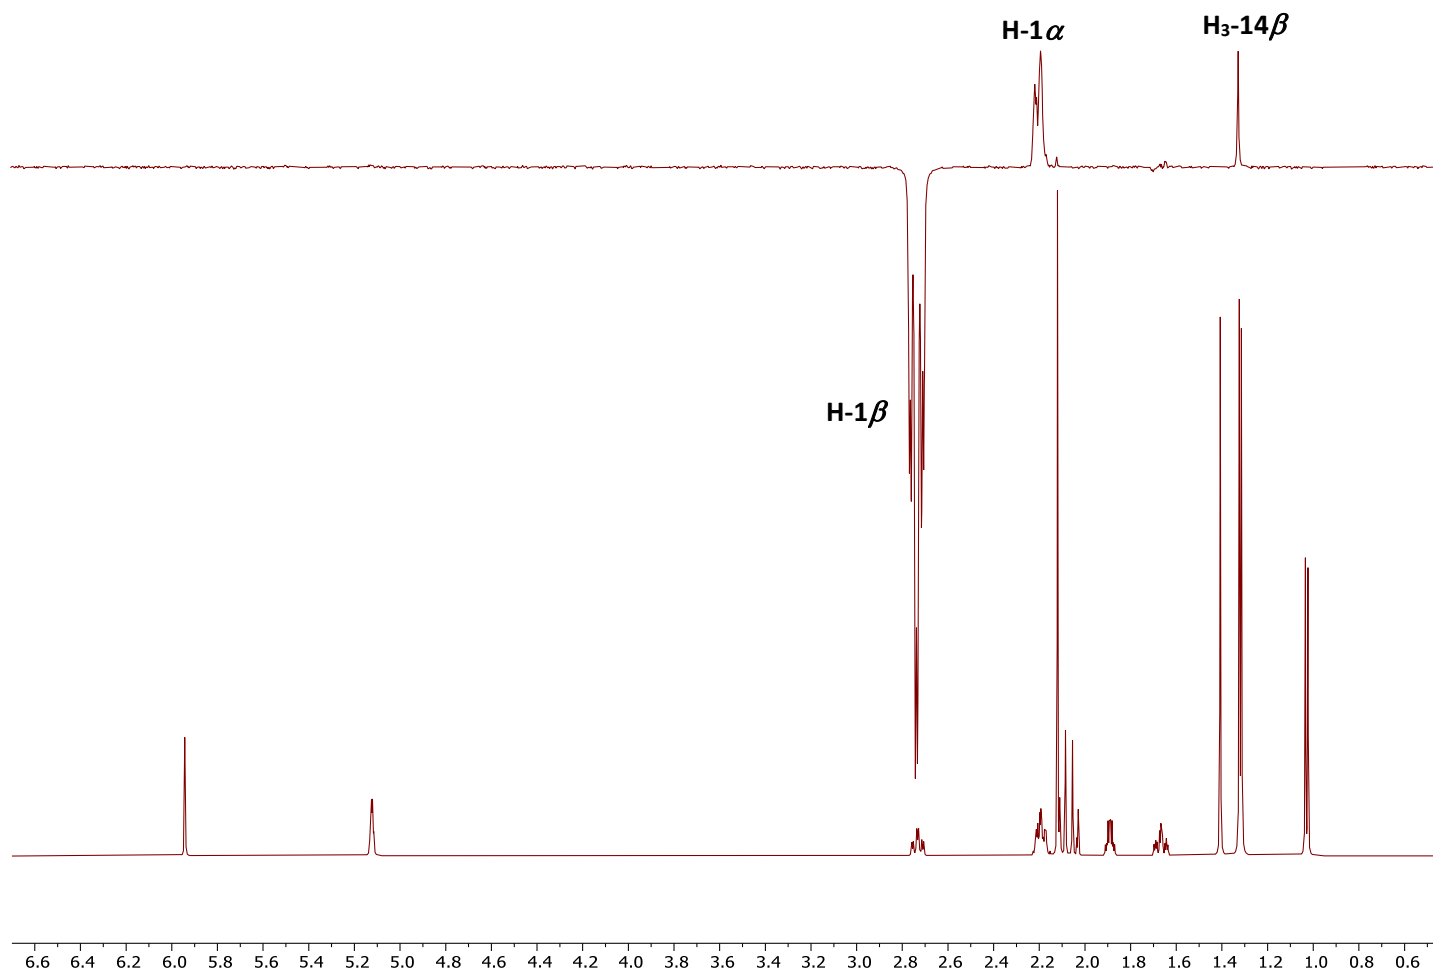

**Figure S22b.** 1D NOESY spectrum of compound **3**.

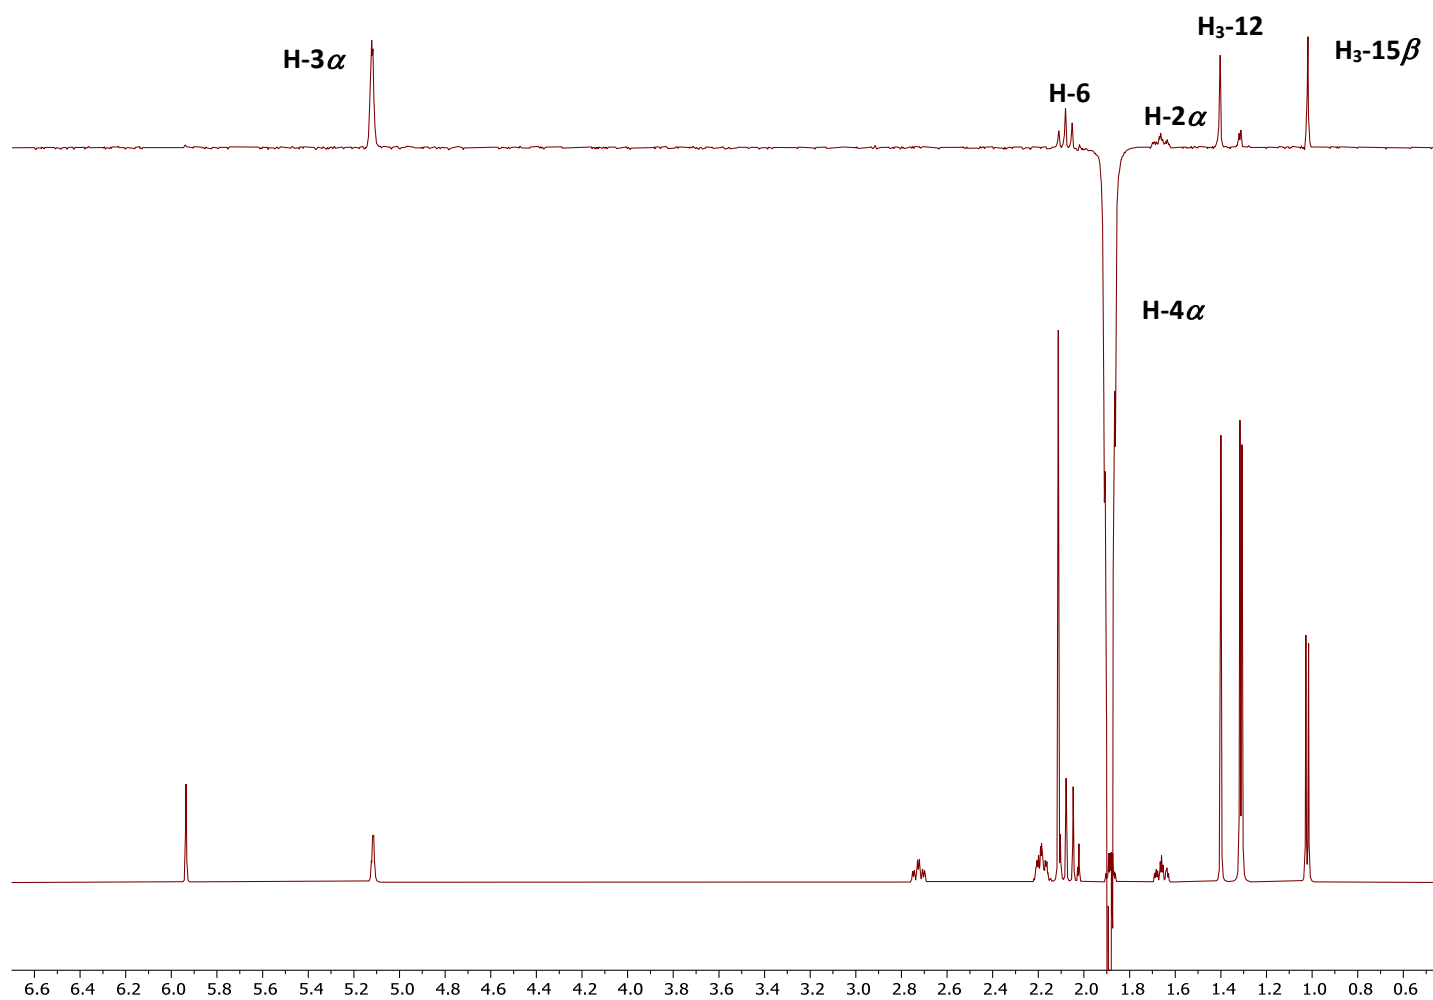

**Figure S22c.** 1D NOESY spectrum of compound **3**.

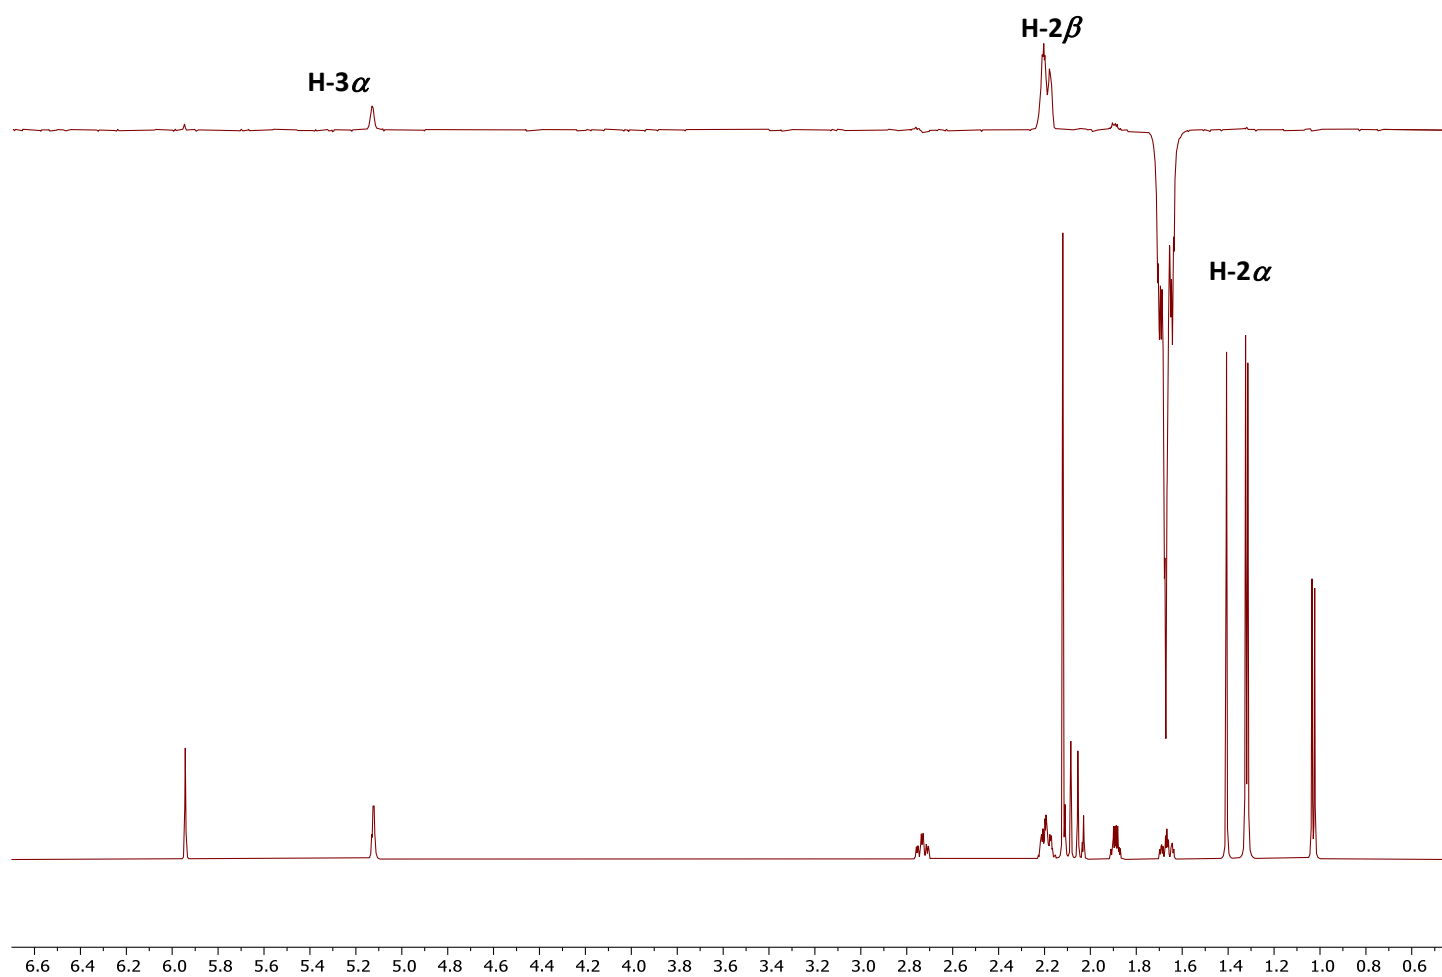

**Figure S22d.** 1D NOESY spectrum of compound **3**.

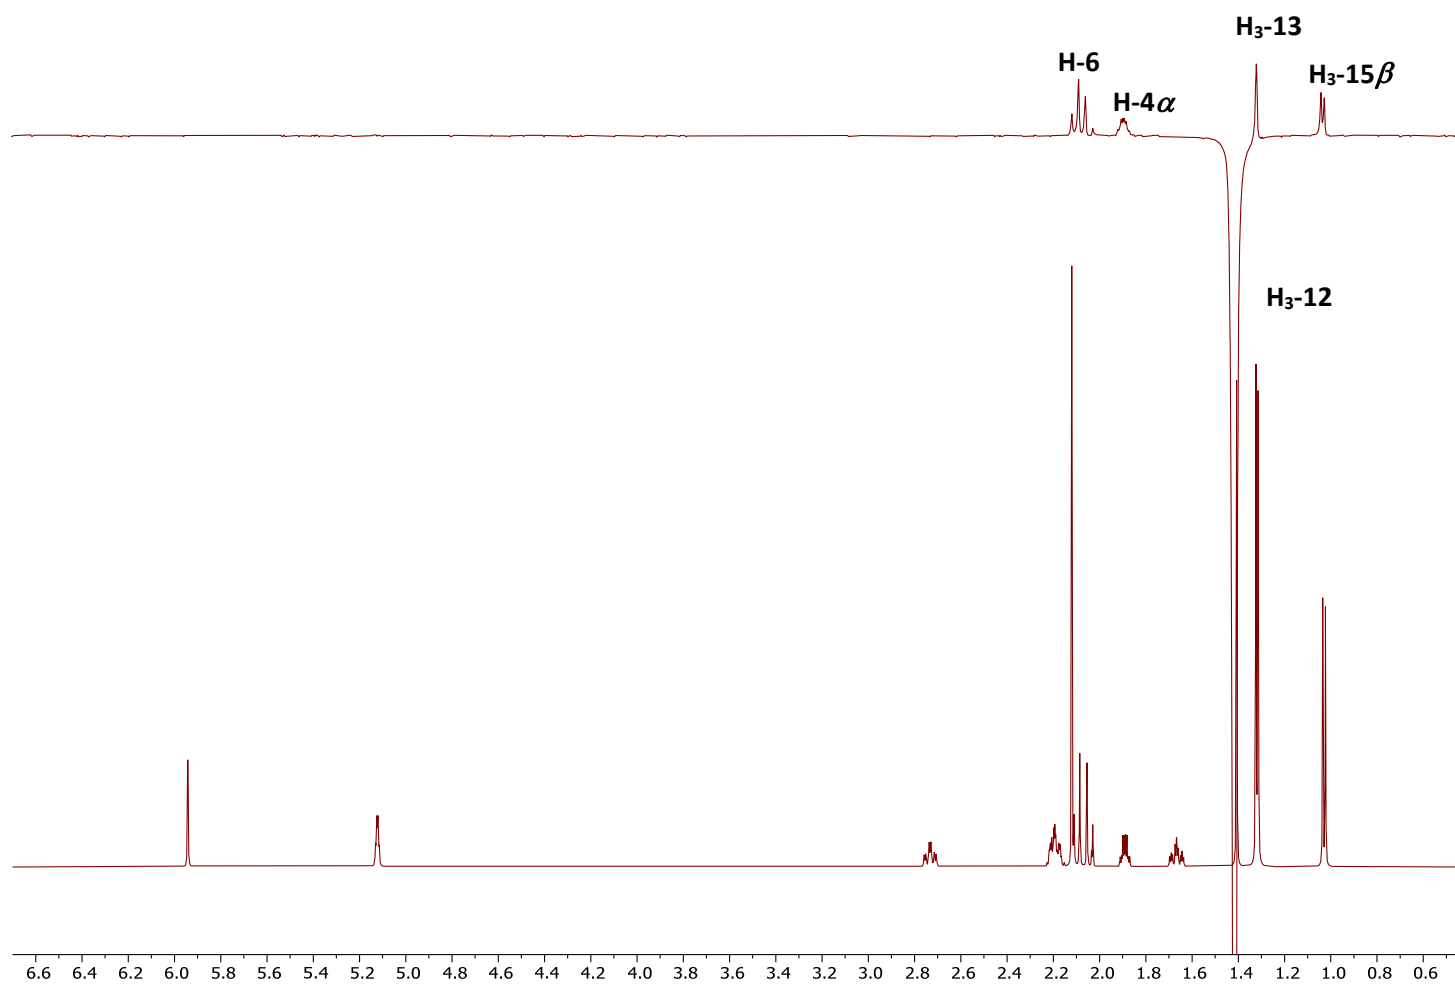

**Figure S22e.** 1D NOESY spectrum of compound **3**.

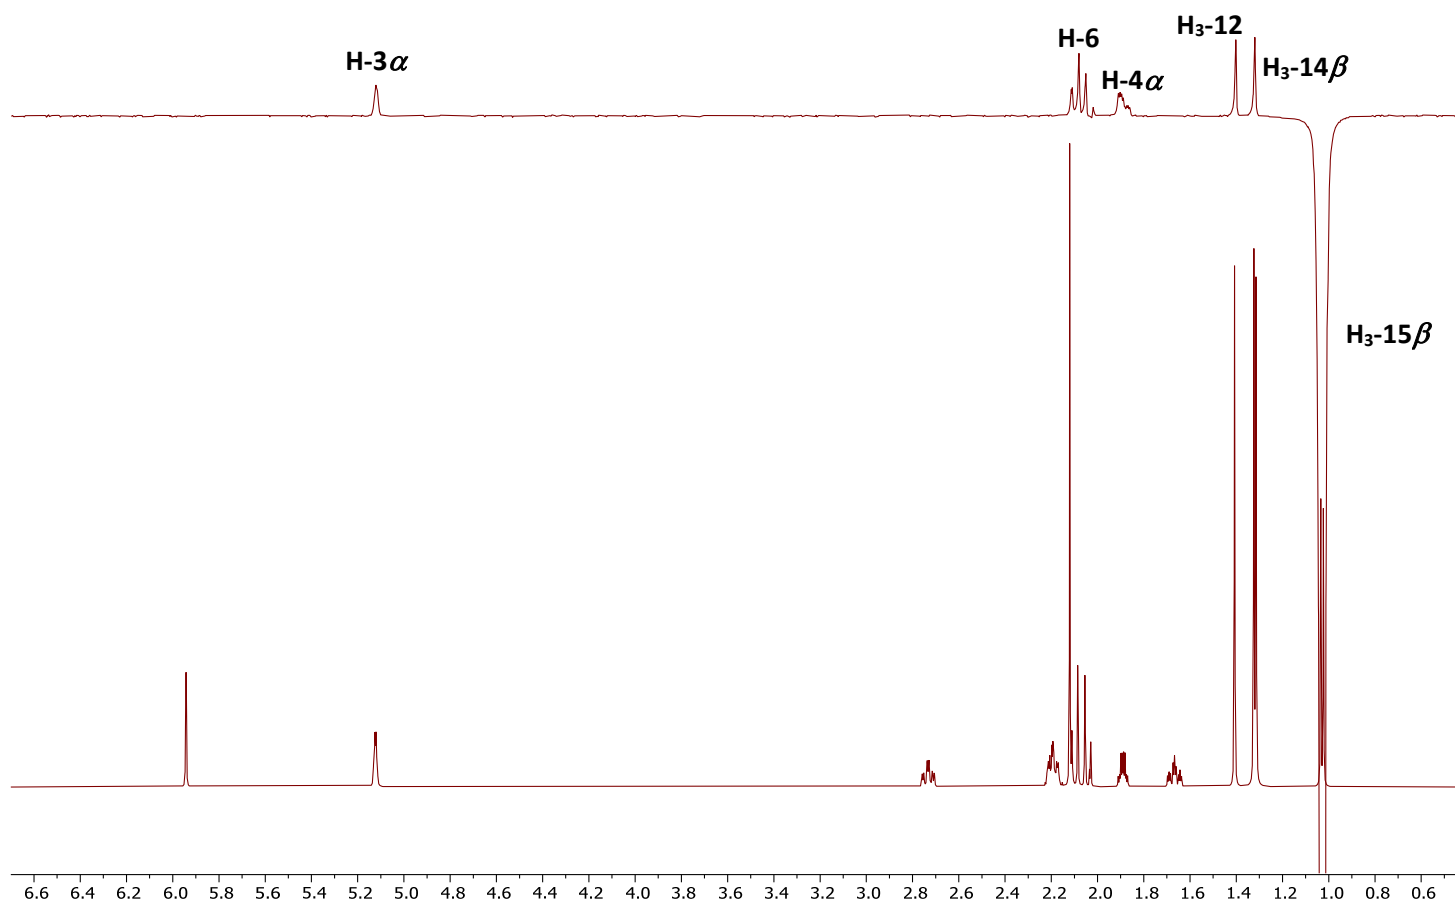

**Figure S22f.** 1D NOESY spectrum of compound **3**.

## Single Mass Analysis

Tolerance = 5.0 mDa / DBE: min = -1.5, max = 80.0

Element prediction: Off

Number of isotope peaks used for i-FIT = 5

Monoisotopic Mass, Even Electron Ions

221 formula(e) evaluated with 1 results within limits (up to 5 closest results for each mass)

Elements Used:

C: 0-100 H: 0-100 O: 0-50 Na: 0-1 Br: 0-8

EMIF40BC30P2 103 (1.912)

1: TOF MS ES+

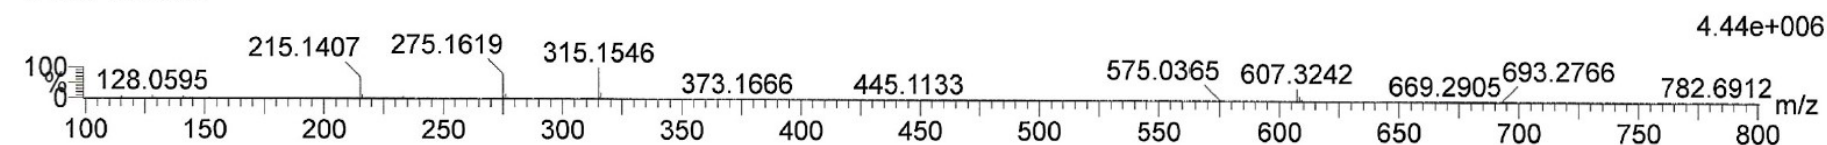

Minimum: -1.5

Maximum: 5.0 5.0 80.0

| Mass     | Calc. Mass | mDa  | PPM  | DBE | i-FIT  | Norm | Conf (%) | Formula       |
|----------|------------|------|------|-----|--------|------|----------|---------------|
| 315.1546 | 315.1572   | -2.6 | -8.2 | 5.5 | 1290.1 | n/a  | n/a      | C17 H24 O4 Na |

**Figure S23.** HRESIMS spectrum of compound **3**.



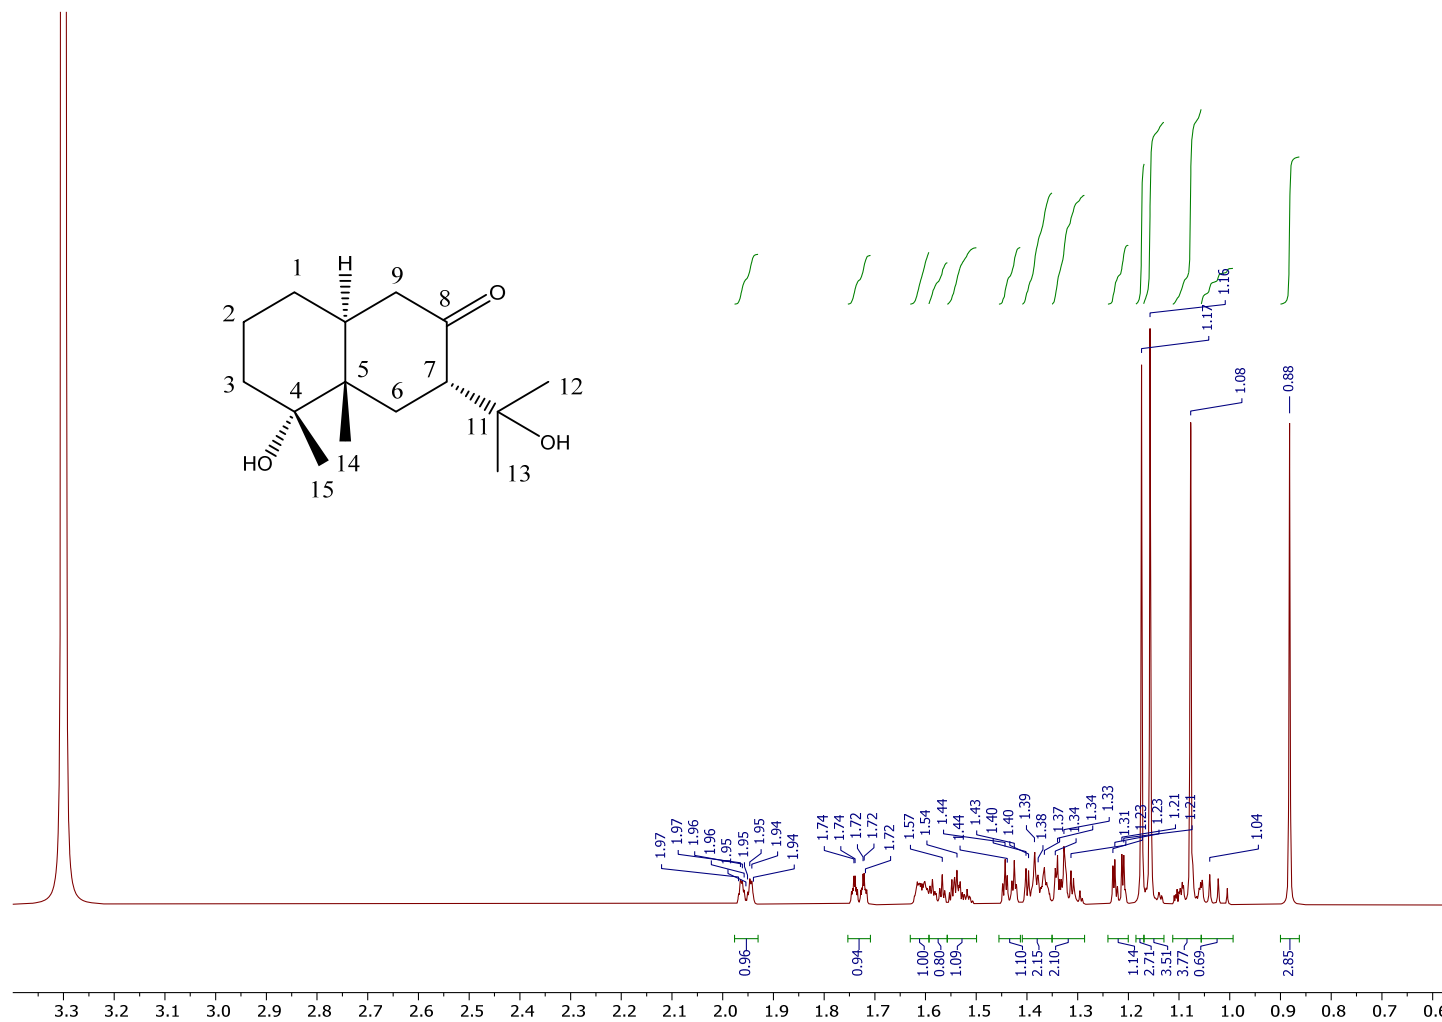

Figure S24a. <sup>1</sup>H NMR spectrum (700 MHz, CD<sub>3</sub>OD) of compound 4.

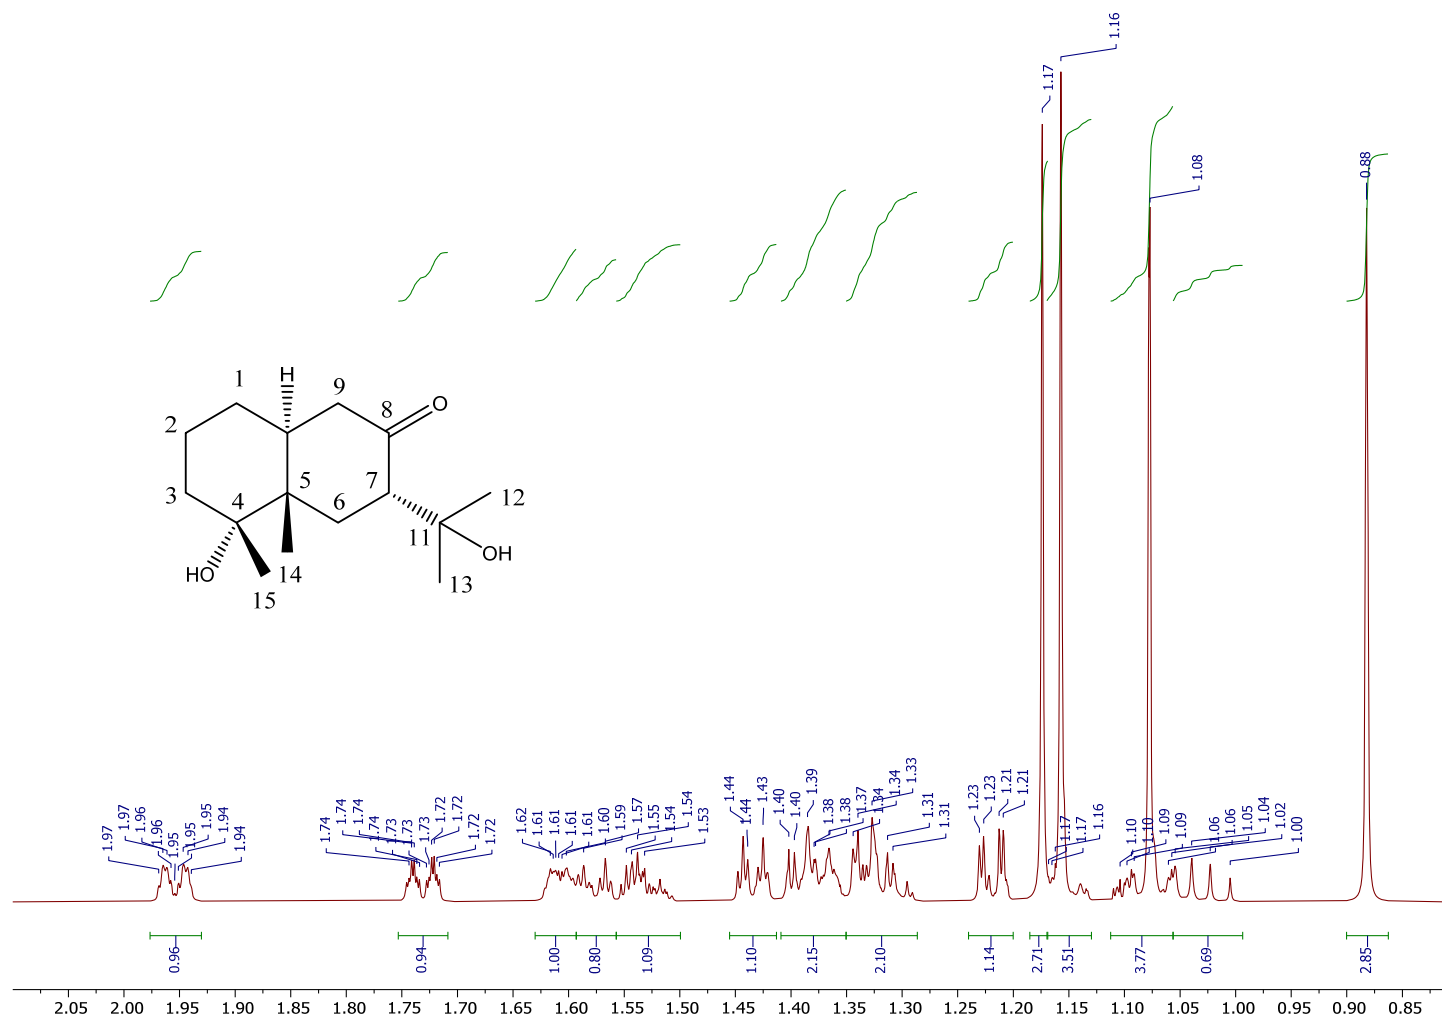

**Figure S24b.** Expansion of  $^1\text{H}$  NMR spectrum (700 MHz,  $\text{CD}_3\text{OD}$ ) of compound **4**.

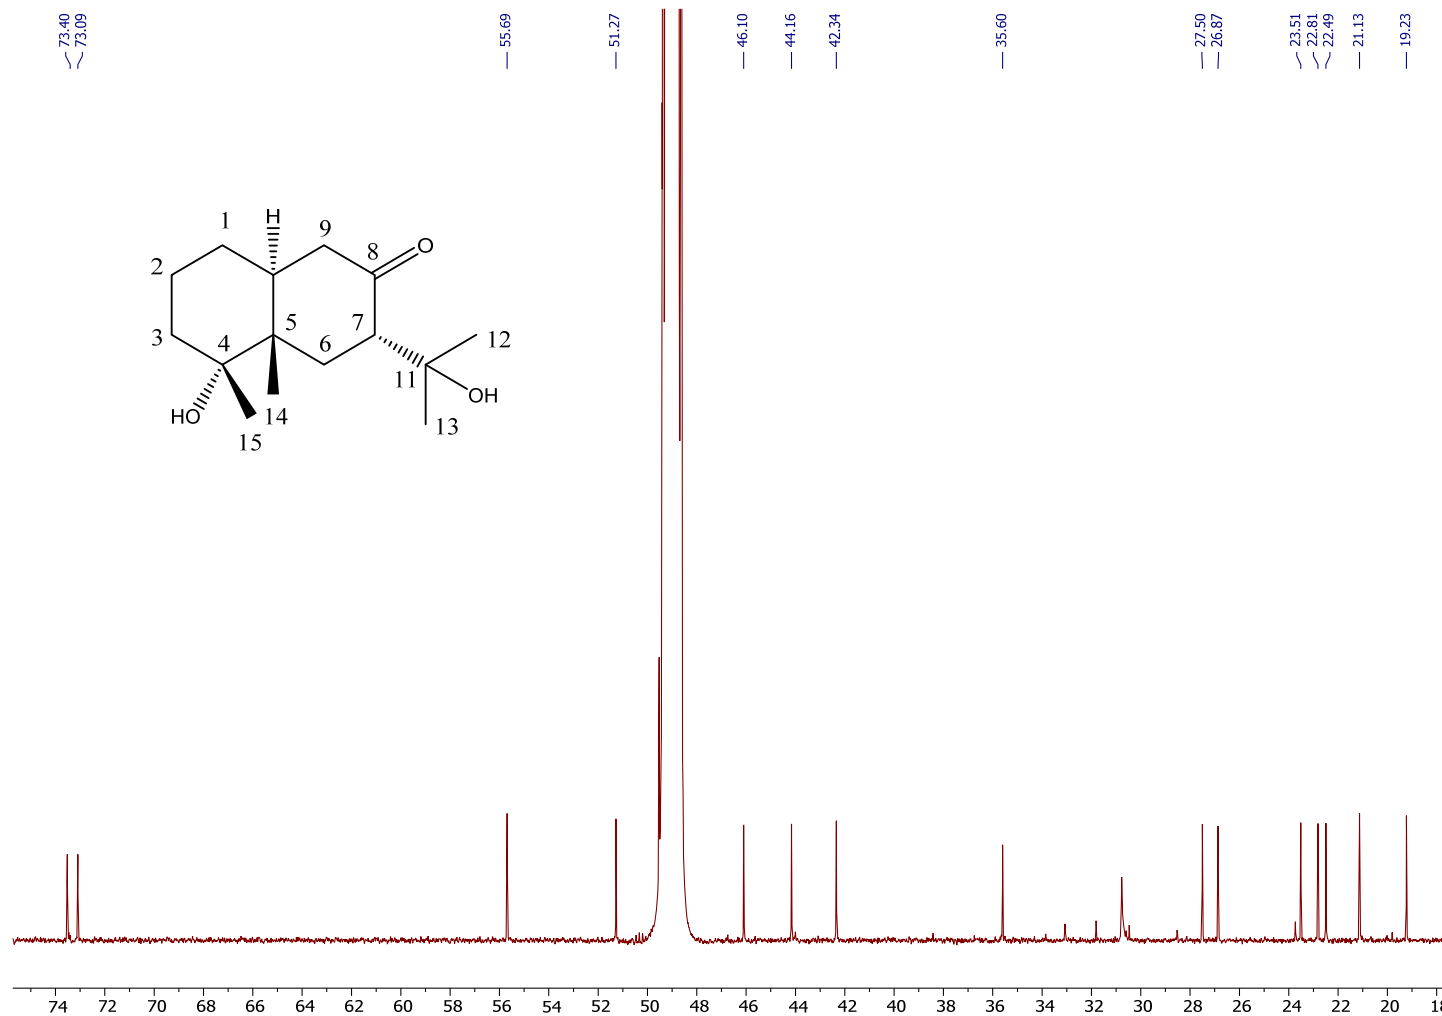

Figure S25. <sup>13</sup>C NMR spectrum (175 MHz, CD<sub>3</sub>OD) of compound 4.

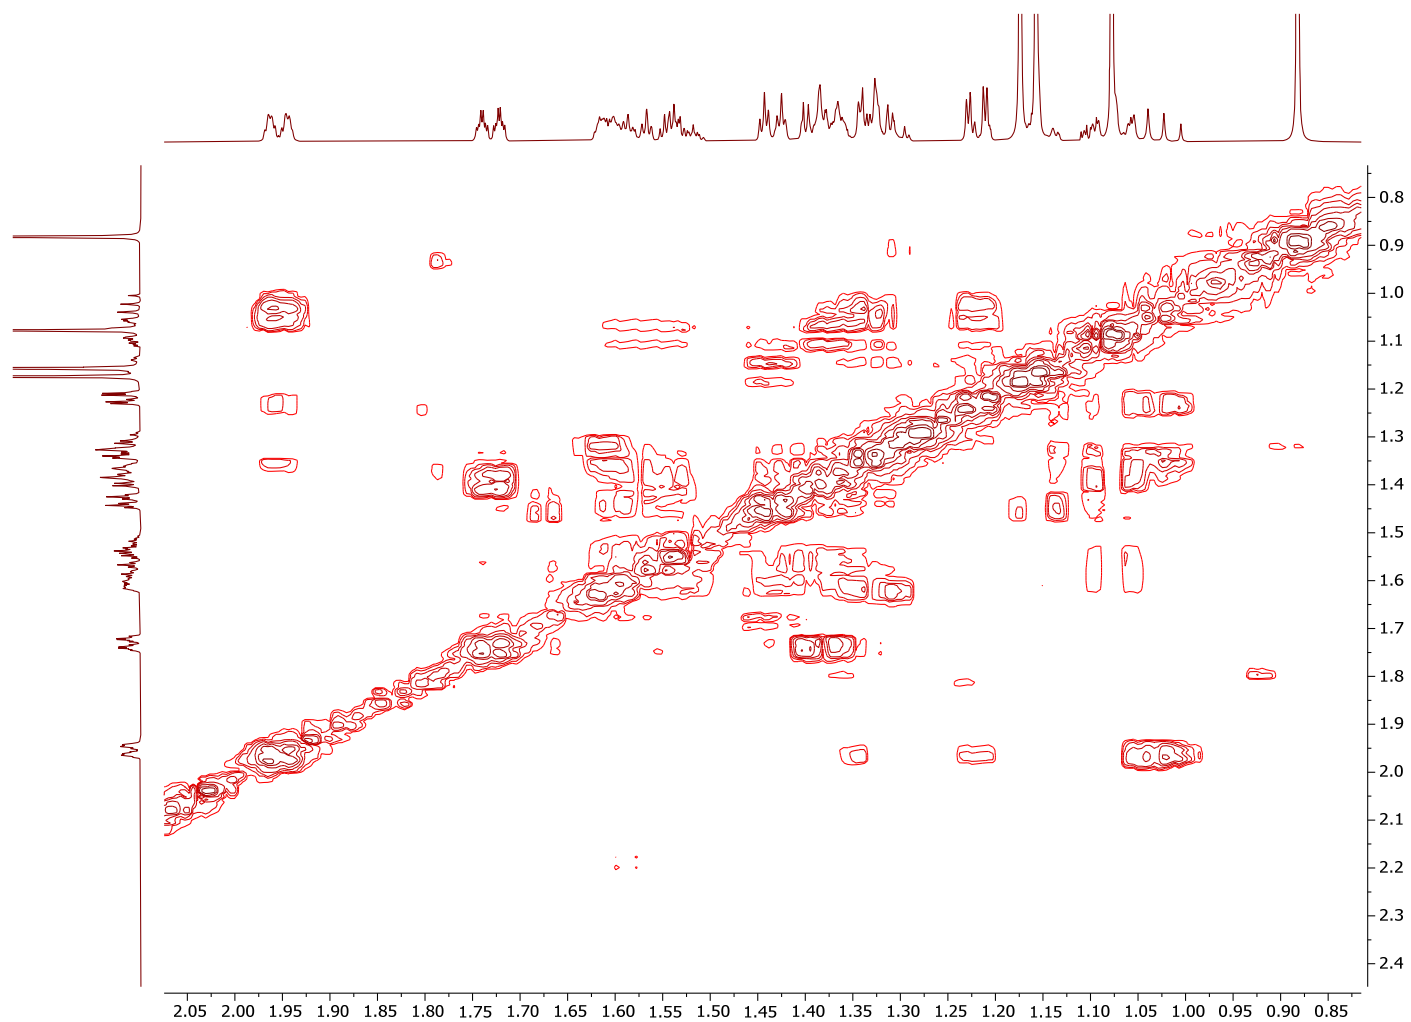

**Figure S26.** gCOSY spectrum of compound **4**.

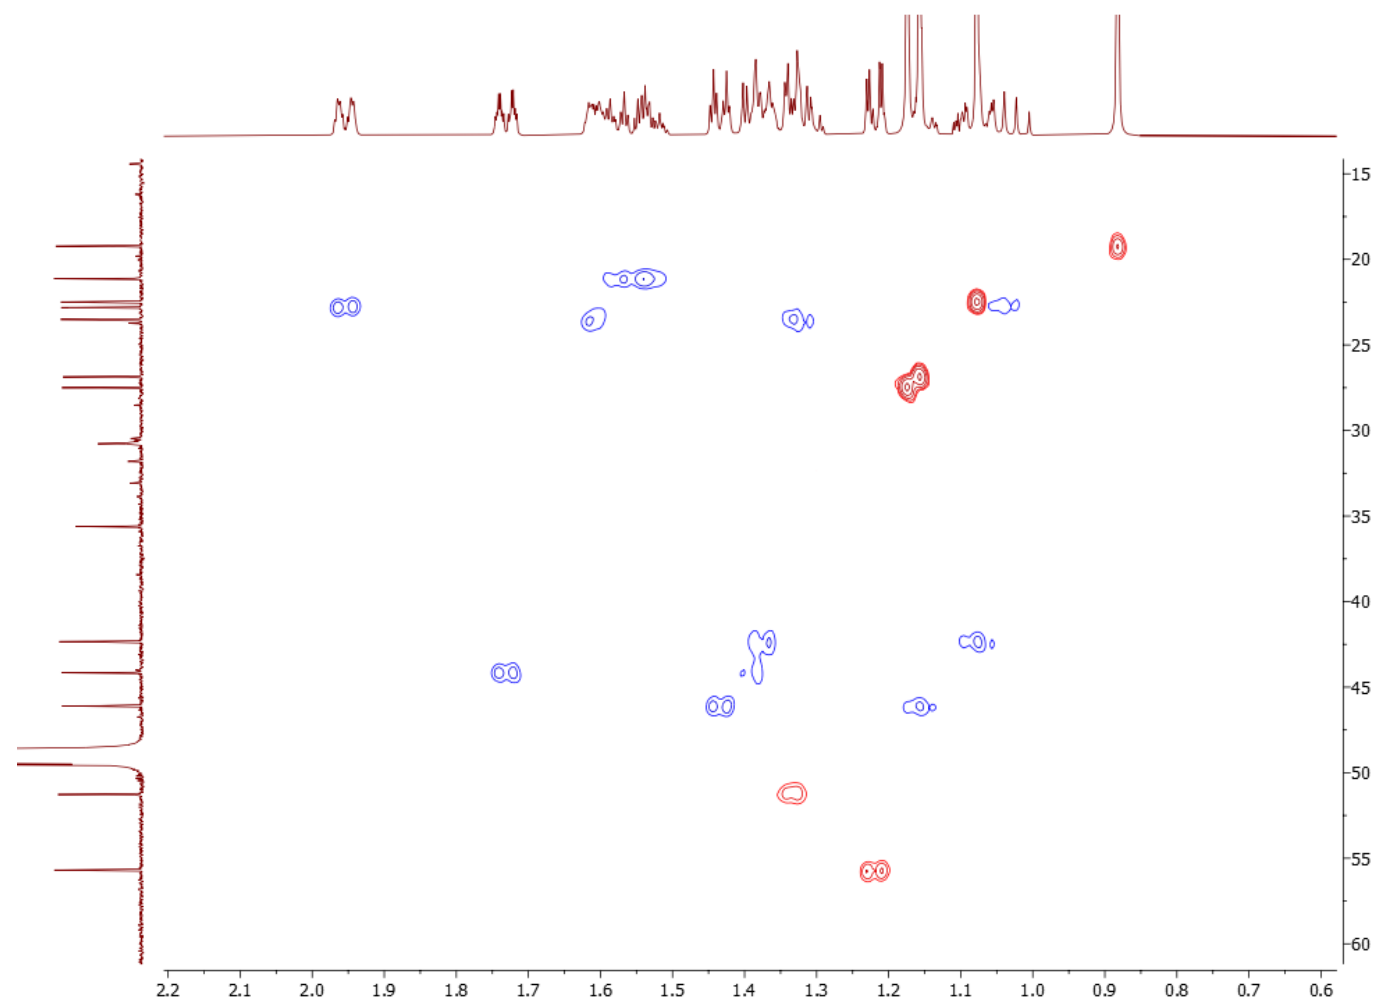

**Figure S27.** gHSQC spectrum of compound 4.

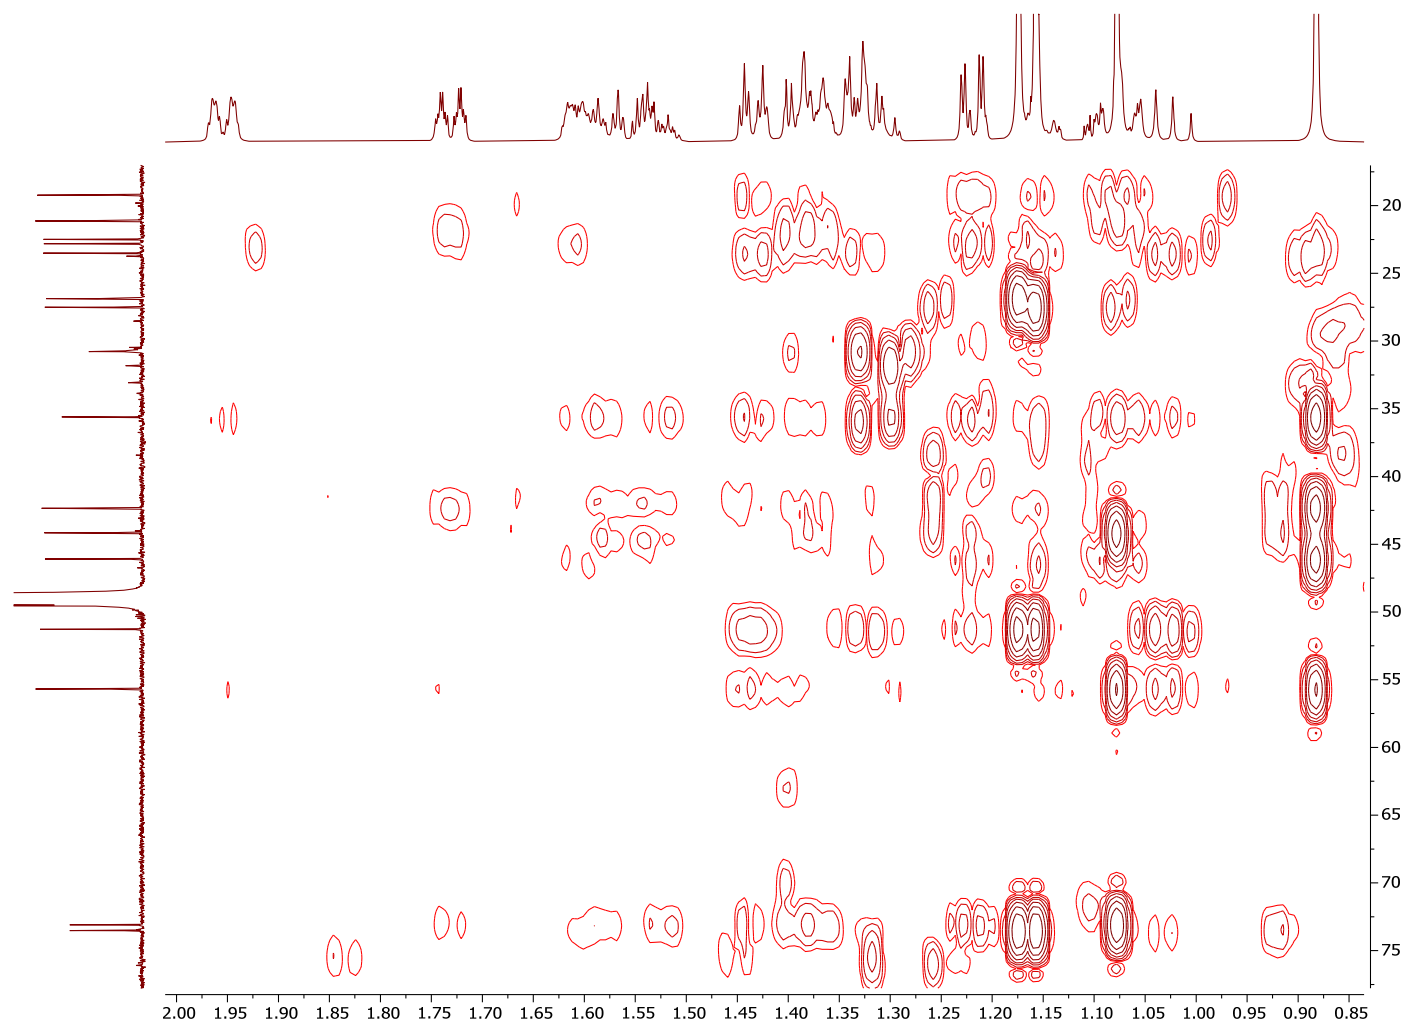

**Figure S28.** gHMBC spectrum of compound **4**.

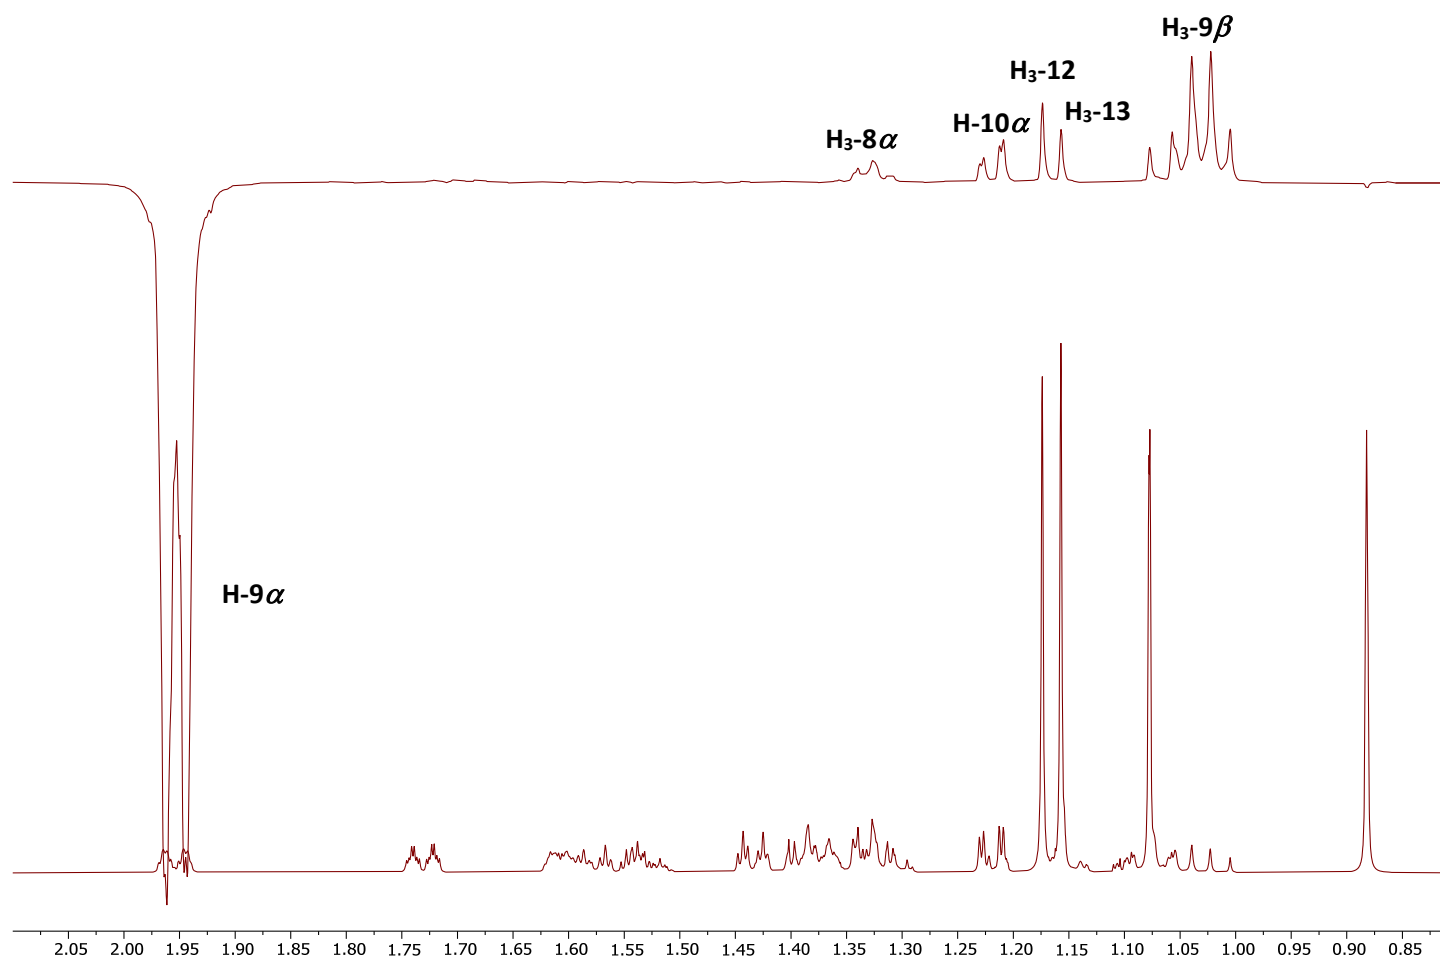

**Figure S29a.** 1D NOESY spectrum of compound 4.

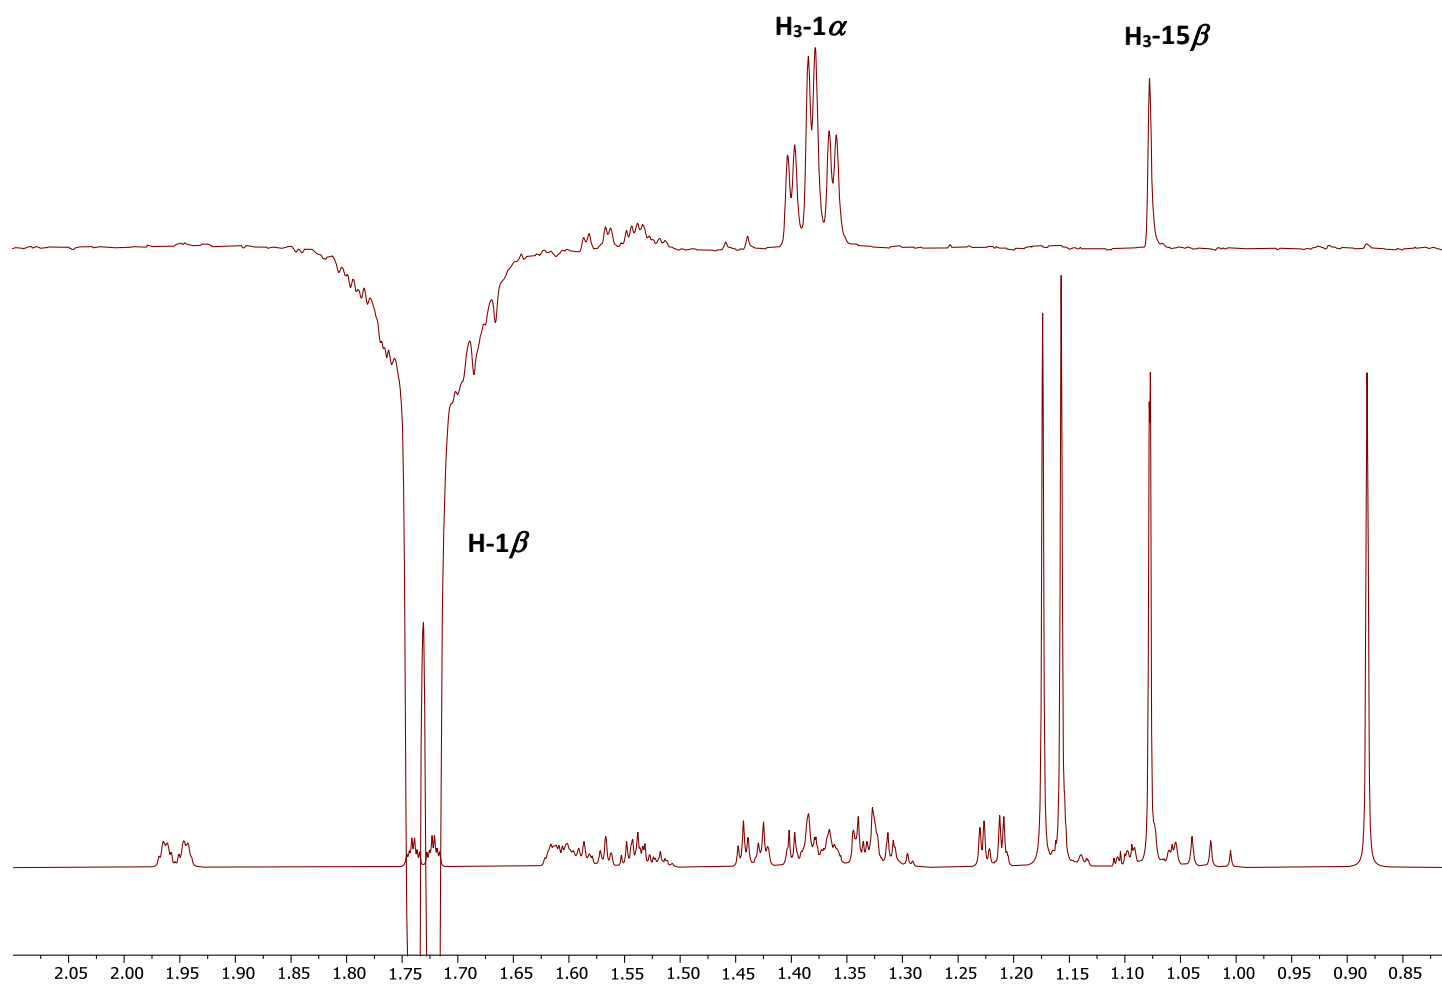

**Figure S29b.** 1D NOESY spectrum of compound 4.



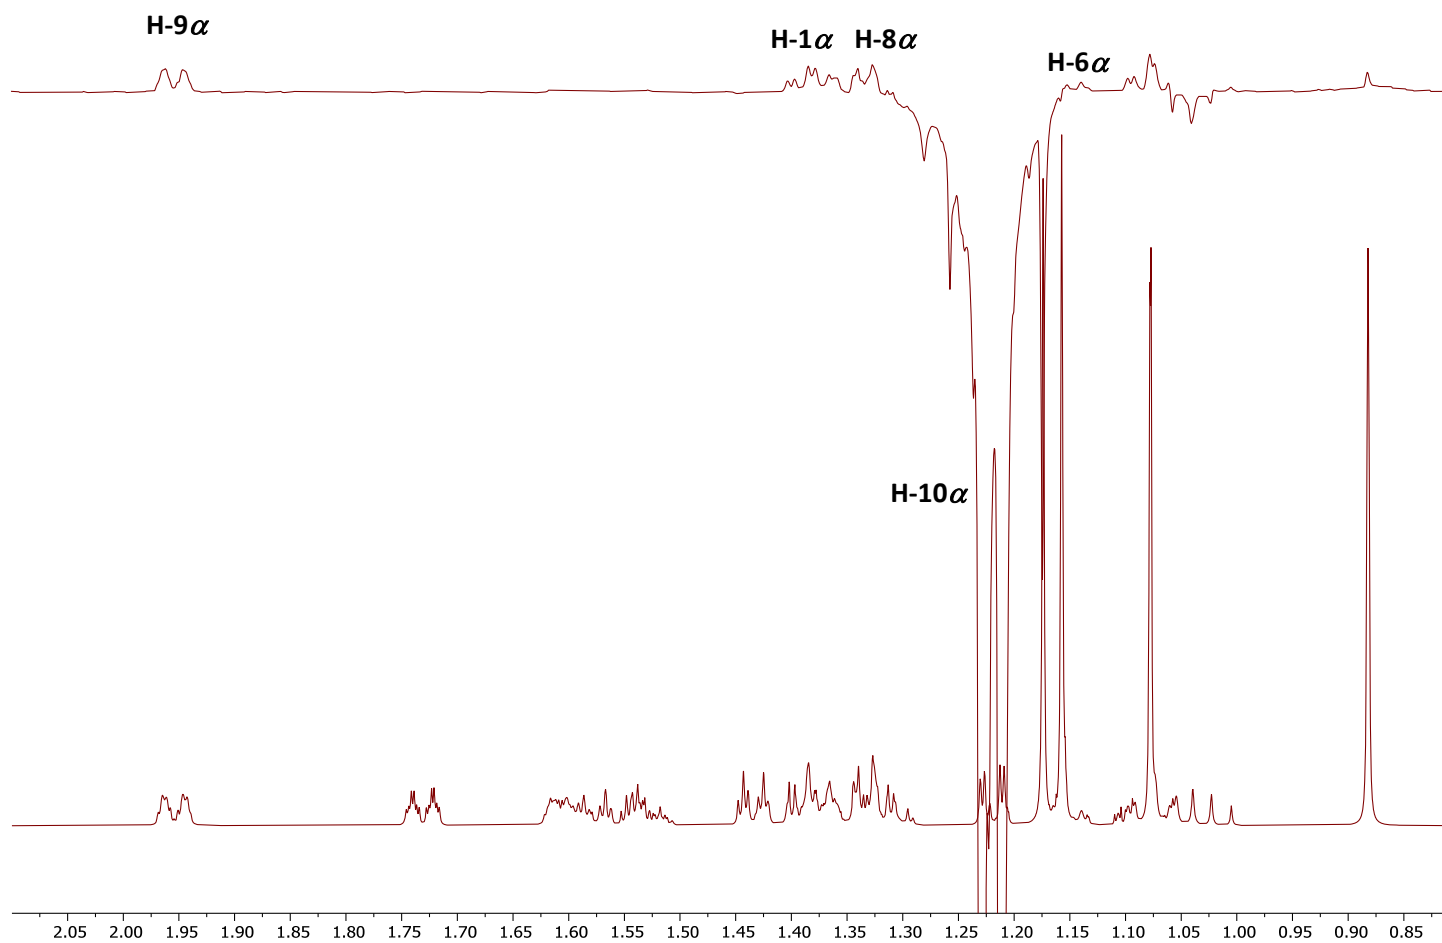

**Figure S29c.** 1D NOESY spectrum of compound **4**.

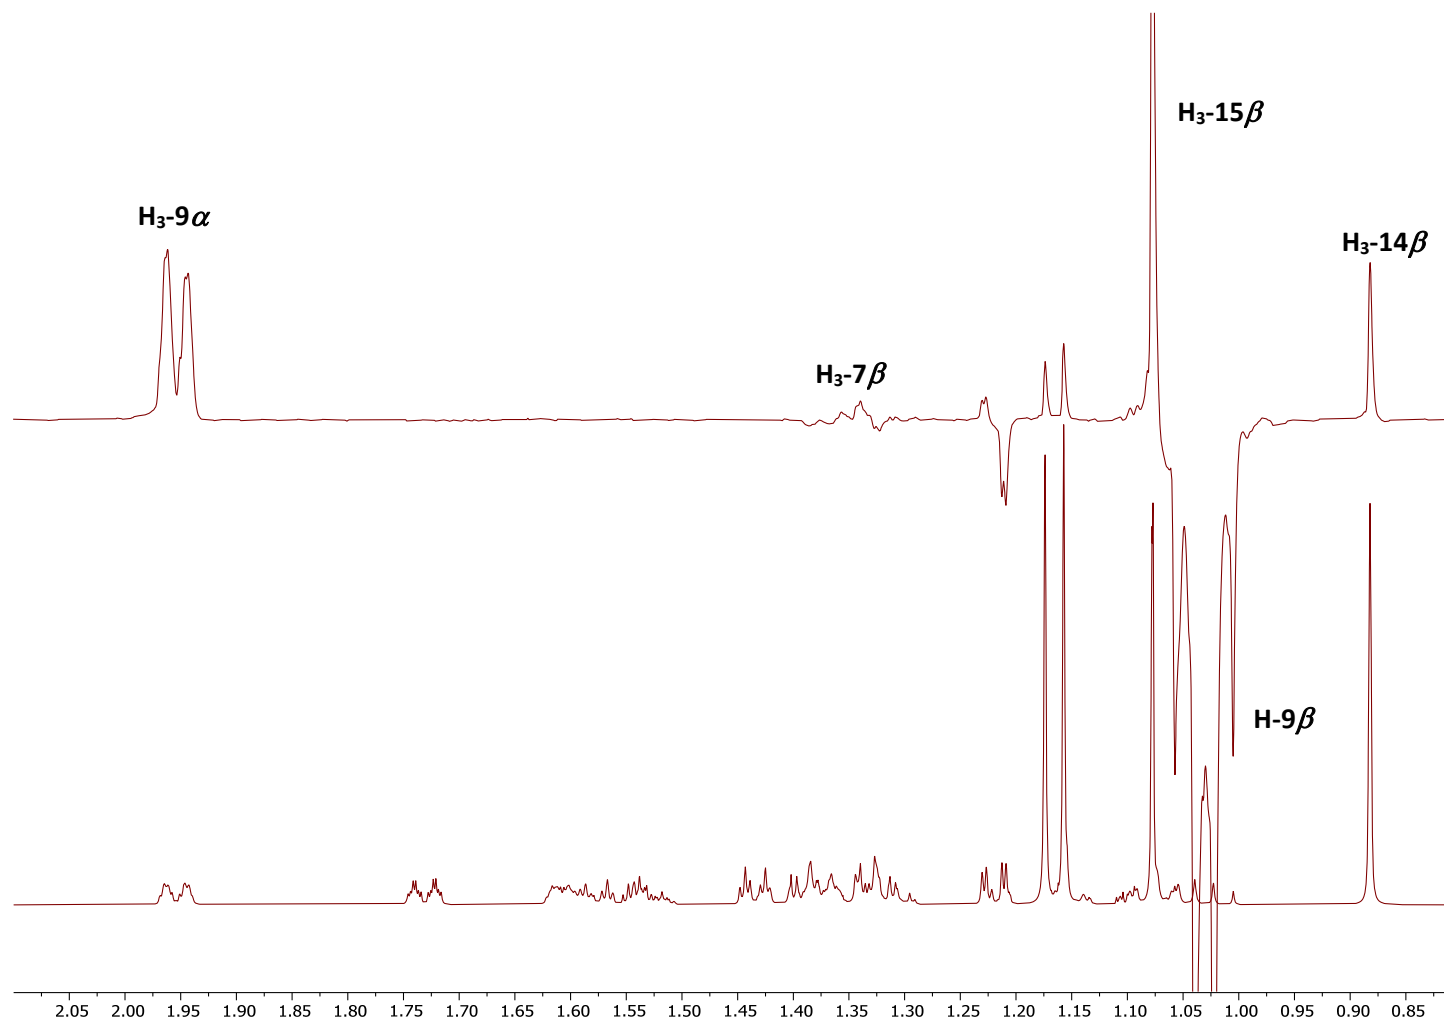

**Figure S29d.** 1D NOESY spectrum of compound 4.

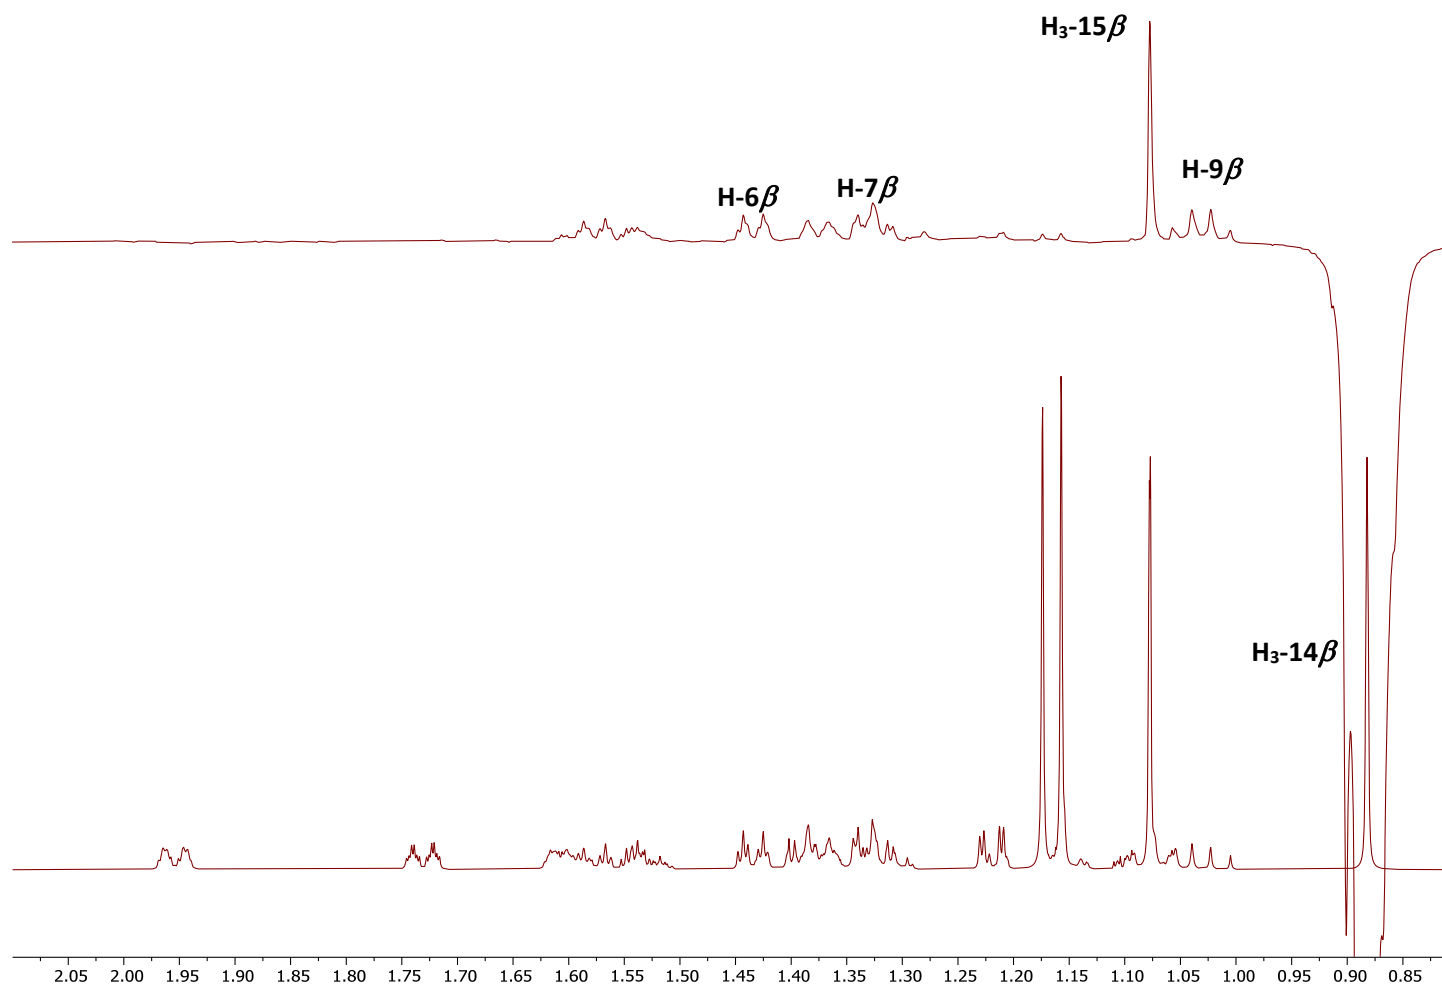

**Figure S29e.** 1D NOESY spectrum of compound **4**.

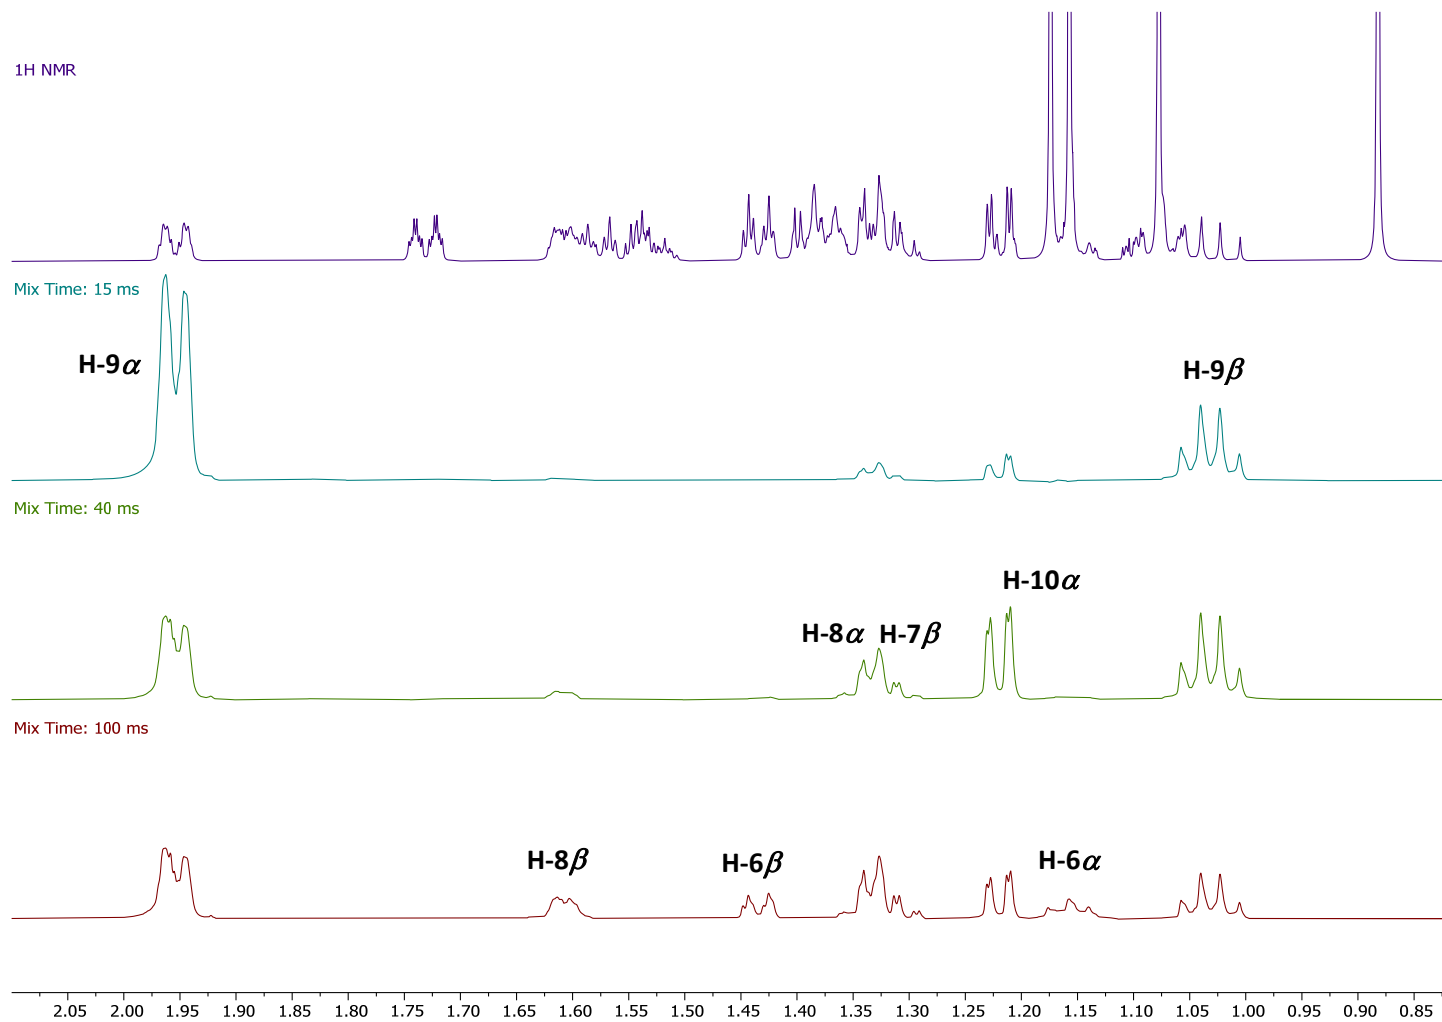

Figure S30a. 1D TOCSY spectra of compound 4.

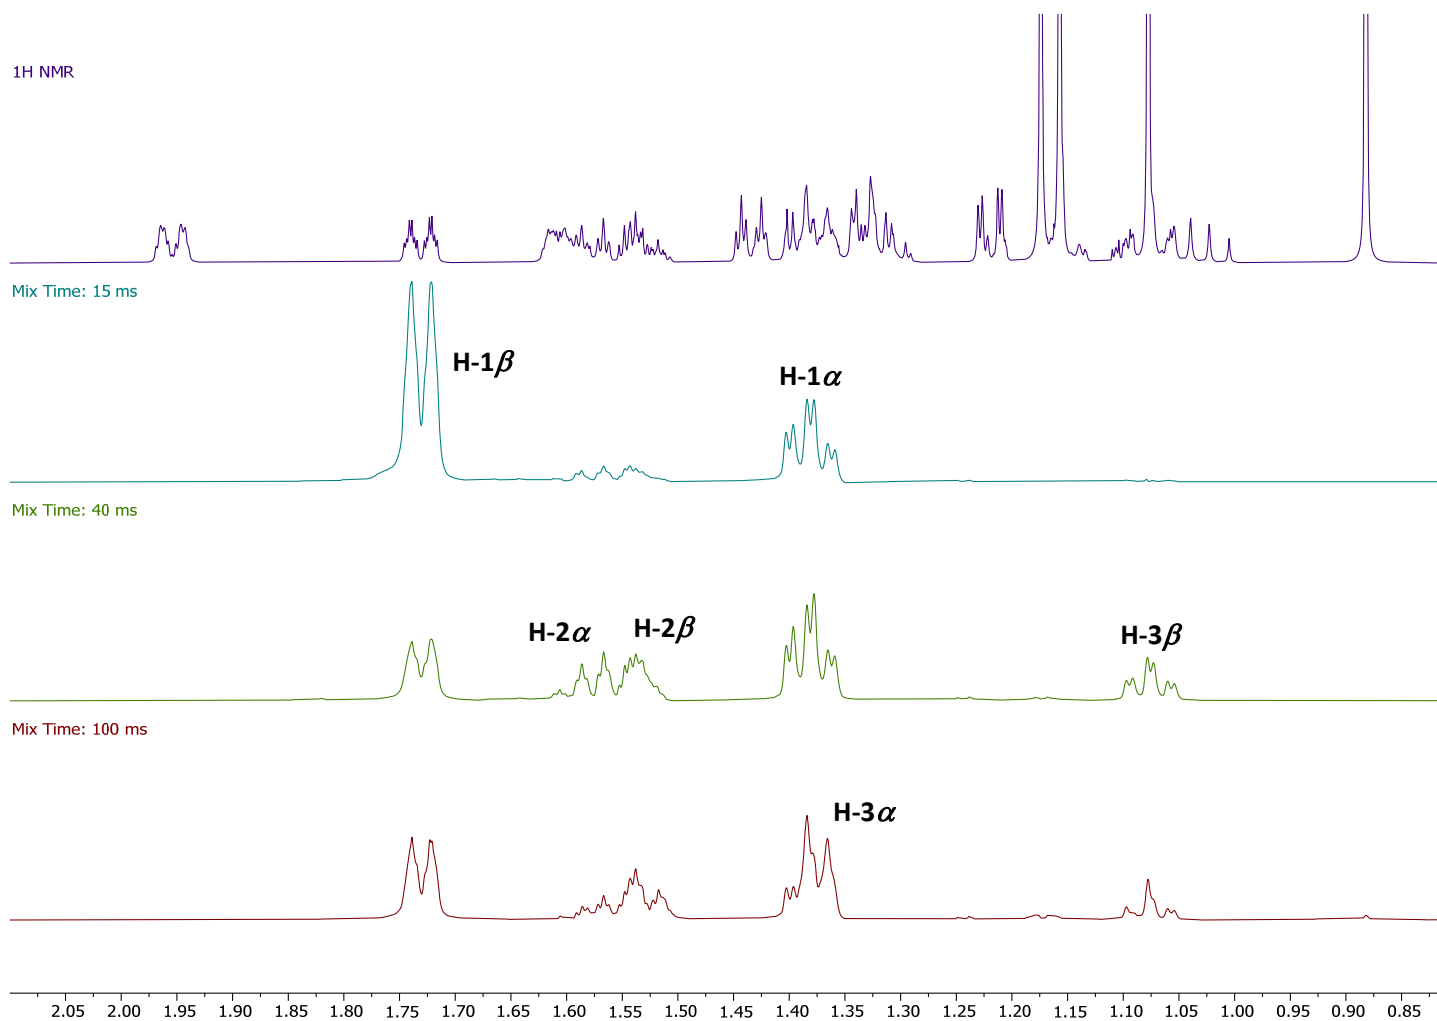

Figure S30b. 1D TOCSY spectra of compound 4.

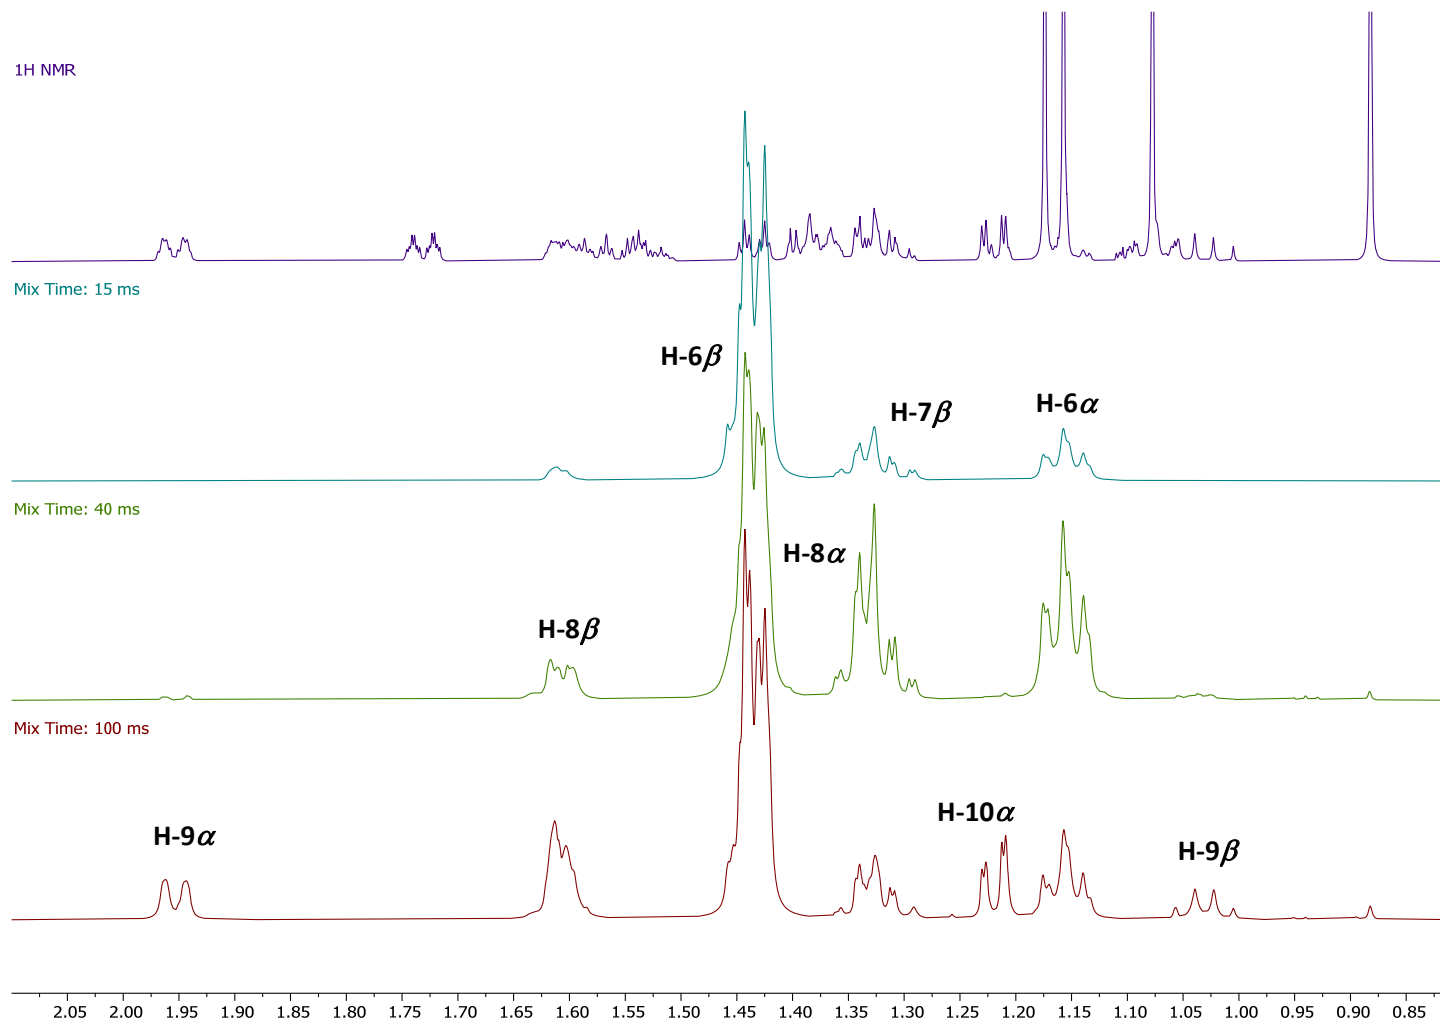

Figure S30c. 1D TOCSY spectra of compound 4.

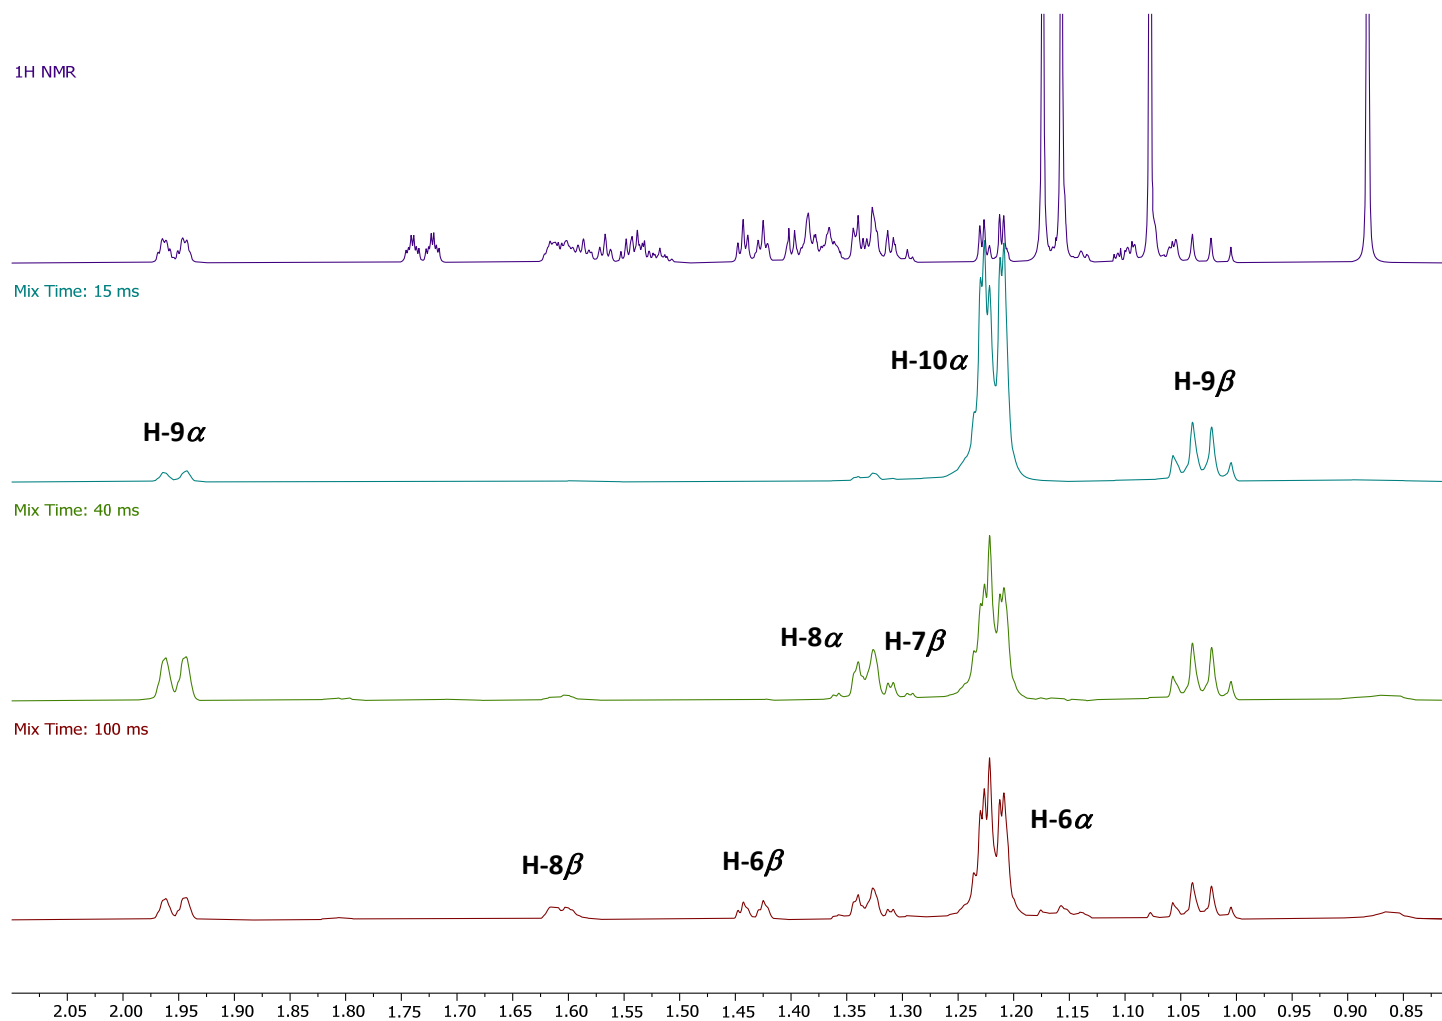

Figure S30d. 1D TOCSY spectra of compound 4.

## Single Mass Analysis

Tolerance = 3.0 mDa / DBE: min = -1.5, max = 80.0

Element prediction: Off

Number of isotope peaks used for i-FIT = 3

Monoisotopic Mass, Even Electron Ions

85 formula(e) evaluated with 2 results within limits (up to 5 closest results for each mass)

Elements Used:

C: 0-100 H: 0-100 O: 0-20 Na: 0-1

ROSA DURAN

CARLOS-16-F60 405 (4.658)

1: TOF MS ES+  
2.75e+006

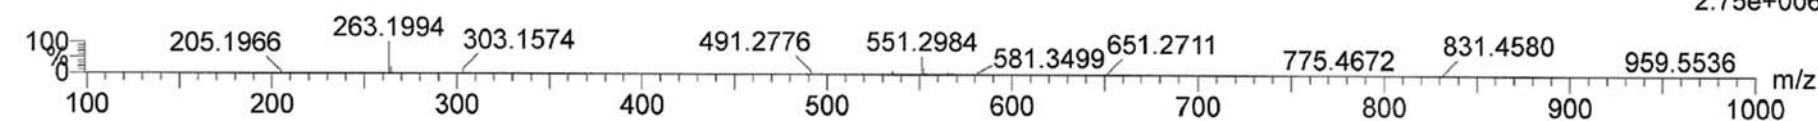

Minimum:

Maximum: 3.0 5.0 80.0

| Mass     | Calc. Mass | mDa  | PPM  | DBE | i-FIT | Norm  | Conf (%) | Formula       |
|----------|------------|------|------|-----|-------|-------|----------|---------------|
| 263.1994 | 263.1987   | 0.7  | 2.7  | 1.5 | 898.4 | 0.000 | 99.97    | C15 H28 O2 Na |
|          | 263.2011   | -1.7 | -6.5 | 4.5 | 906.7 | 8.281 | 0.03     | C17 H27 O2    |

Figure S31. HRESIMS spectrum of compound 4.
